# Supplementary material
Source: publisher figshare collection journal article supplement (https://acs.figshare.com/ndownloader/files/9717373)
Supplement: Supplementary file 1 [file 9717373]

55
Ru-1_M06-2X
Ru +6.51773466E-01 -1.15306210E+00 +3.40899205E-01 
Cl -7.88937882E-01 -1.31602523E+00 +2.17966607E+00 
N  +2.73956213E-01 +1.71470063E+00 -4.30594628E-01 
N  +1.58551407E+00 +1.40237888E+00 +1.28269225E+00 
C  -4.18195517E-01 -1.49916711E+00 -1.01912201E+00 
C  +8.21633476E-01 +7.71995428E-01 +3.62988972E-01 
C  -5.91716532E-01 +1.50796686E+00 -1.54426779E+00 
C  -1.97551730E+00 +1.47597799E+00 -1.32609967E+00 
C  -2.52881525E+00 +1.57858132E+00 +6.95459371E-02 
C  -2.80331430E+00 +1.26550834E+00 -2.42988790E+00 
C  -2.28136292E+00 +1.08999374E+00 -3.71614250E+00 
C  -3.20126012E+00 +8.91432122E-01 -4.89223426E+00 
C  -8.94465484E-01 +1.11685004E+00 -3.88750845E+00 
C  -2.70225269E-02 +1.32371559E+00 -2.81195231E+00 
C  +1.46720510E+00 +1.26341804E+00 -2.98009991E+00 
C  +6.67562599E-01 +3.08089313E+00 -6.62185631E-02 
C  +1.58322249E+00 +2.85949888E+00 +1.14454916E+00 
C  +2.34603695E+00 +7.74183973E-01 +2.32157689E+00 
C  +3.68980944E+00 +4.42000992E-01 +2.07812352E+00 
C  +4.39875376E+00 +8.37135750E-01 +8.09213974E-01 
C  +4.39694620E+00 -2.02984344E-01 +3.09367403E+00 
C  +3.81570818E+00 -4.86339577E-01 +4.33121718E+00 
C  +2.50690284E+00 -6.07750313E-02 +4.56535081E+00 
C  +1.75625950E+00 +5.87781675E-01 +3.58349235E+00 
C  +3.97465297E-01 +1.13998212E+00 +3.92631393E+00 
C  +4.58113811E+00 -1.23999902E+00 +5.38636024E+00 
H  -9.22212526E-01 -8.58342969E-01 -1.74593749E+00 
H  +5.07256865E+00 +3.64835534E-02 +4.79526757E-01 
H  +3.70196056E+00 +1.03357487E+00 -1.38884368E-02 
H  +5.00396778E+00 +1.74046902E+00 +9.92318831E-01 
H  +5.43549273E+00 -4.88383605E-01 +2.90932714E+00 
H  +4.42344517E+00 -2.32356445E+00 +5.27092697E+00 
H  +5.66022694E+00 -1.05133805E+00 +5.30798245E+00 
H  +4.24972706E+00 -9.61506006E-01 +6.39564561E+00 
H  +2.05215946E+00 -2.33420505E-01 +5.54384382E+00 
H  +5.14919295E-01 +2.07776200E+00 +4.49429805E+00 
H  -2.10927365E-01 +1.33430691E+00 +3.03551817E+00 
H  -1.59934647E-01 +4.30875896E-01 +4.55107669E+00 
H  +2.60826258E+00 +3.22197263E+00 +9.77513287E-01 
H  +1.19514744E+00 +3.32247722E+00 +2.06394186E+00 
H  +1.18309035E+00 +3.56114150E+00 -9.10731046E-01 
H  -2.24195970E-01 +3.67757130E+00 +1.74542454E-01 
H  -2.17913990E+00 +2.48893845E+00 +5.79356033E-01 
H  -2.20054457E+00 +7.19639868E-01 +6.77983416E-01 
H  -3.62541826E+00 +1.59570945E+00 +5.36186396E-02 
H  -3.88474290E+00 +1.22457689E+00 -2.27939064E+00 
H  -2.67843224E+00 +4.13639104E-01 -5.73092778E+00 
H  -3.59041368E+00 +1.85853268E+00 -5.24613367E+00 
H  -4.06372196E+00 +2.68129915E-01 -4.61956796E+00 
H  -4.73473554E-01 +9.59328029E-01 -4.88317683E+00 
H  +1.73712185E+00 +1.18358795E+00 -4.04022295E+00 
H  +1.95947183E+00 +2.15680919E+00 -2.56738829E+00 
H  +1.87955371E+00 +3.90555070E-01 -2.44713852E+00 
Cl +2.77036957E+00 -1.60966504E+00 -5.46434324E-01 
H  -5.87807254E-01 -2.58960396E+00 -1.12481878E+00 
61
Ru-2_M06-2X
Ru +1.87150740E-03 +1.10922589E+00 +7.03780740E-03 
Cl -7.83495885E-01 +1.18146228E+00 +2.30369398E+00 
Cl +7.87321666E-01 +1.19899899E+00 -2.28896408E+00 
C  -1.27577600E+00 +2.49513323E+00 -3.99537806E-01 
H  -2.09989413E+00 +2.59907325E+00 +3.07438378E-01 
C  -9.76101500E-04 -9.26609131E-01 -3.66718580E-03 
H  -1.52378009E+00 +2.60805150E+00 -1.45633786E+00 
N  -1.09384140E+00 -1.69583341E+00 -2.03858600E-04 
C  -7.64390486E-01 -3.12371256E+00 -1.26370146E-01 
C  +7.56538036E-01 -3.12714859E+00 +9.06283397E-02 
N  +1.08979540E+00 -1.69866678E+00 -1.68249412E-02 
H  +1.04005531E+00 -3.49944191E+00 +1.08745706E+00 
H  -1.30649446E+00 -3.71081250E+00 +6.25414121E-01 
C  +2.43392594E+00 -1.20078167E+00 -2.18267502E-02 
C  +2.99697739E+00 -7.36720960E-01 +1.17420201E+00 
C  +3.14296285E+00 -1.19572255E+00 -1.23473084E+00 
C  +4.29193708E+00 -2.09193230E-01 +1.12240011E+00 
C  +4.42912881E+00 -6.60811581E-01 -1.23287138E+00 
C  +5.01473163E+00 -1.51860036E-01 -6.87675129E-02 
H  +4.74581611E+00 +1.60161345E-01 +2.04503181E+00 
H  +4.98705685E+00 -6.30473482E-01 -2.17181437E+00 
C  -2.43660941E+00 -1.19429589E+00 +1.23832333E-02 
C  -3.00051277E+00 -7.15838225E-01 -1.17750568E+00 
C  -3.14338734E+00 -1.20038157E+00 +1.22660601E+00 
C  -4.29396765E+00 -1.85455173E-01 -1.11763547E+00 
C  -4.42811905E+00 -6.62108565E-01 +1.23290395E+00 
C  -5.01445271E+00 -1.39077990E-01 +7.53914324E-02 
H  -4.74851644E+00 +1.95089951E-01 -2.03537495E+00 
H  -4.98430562E+00 -6.40486894E-01 +2.17310859E+00 
C  +2.53983982E+00 -1.75954462E+00 -2.49245356E+00 
H  +3.08292192E+00 -1.39506498E+00 -3.37323790E+00 
H  +2.59642364E+00 -2.86070824E+00 -2.49574633E+00 
H  +1.49009006E+00 -1.45402215E+00 -2.59525837E+00 
C  +2.24539955E+00 -7.99552609E-01 +2.47742800E+00 
H  +1.68978958E+00 -1.74333153E+00 +2.57741985E+00 
H  +2.94092340E+00 -7.19411273E-01 +3.32232851E+00 
H  +1.50412200E+00 +1.00673188E-02 +2.56277965E+00 
C  -2.53882365E+00 -1.77869936E+00 +2.47702480E+00 
H  -3.08506606E+00 -1.42987355E+00 +3.36217155E+00 
H  -2.58893953E+00 -2.88008186E+00 +2.46479013E+00 
H  -1.49089913E+00 -1.46868982E+00 +2.58531588E+00 
C  -2.25140992E+00 -7.66716523E-01 -2.48266723E+00 
H  -1.50560667E+00 +3.95953513E-02 -2.55921857E+00 
H  -1.70146866E+00 -1.71239739E+00 -2.59530800E+00 
H  -2.94779838E+00 -6.72146415E-01 -3.32535481E+00 
H  +1.29704960E+00 -3.70568230E+00 -6.68920145E-01 
H  -1.04873162E+00 -3.48211748E+00 -1.12802626E+00 
C  -6.39433726E+00 +4.62277686E-01 +1.29907099E-01 
H  -6.38465770E+00 +1.39826775E+00 +7.08627806E-01 
H  -6.77221223E+00 +6.88480353E-01 -8.75456521E-01 
H  -7.10303396E+00 -2.19740485E-01 +6.21013847E-01 
C  +6.39633317E+00 +4.46302878E-01 -1.14298970E-01 
H  +7.10437431E+00 -2.32879026E-01 -6.10263467E-01 
H  +6.39052373E+00 +1.38781766E+00 -6.84034114E-01 
H  +6.77244334E+00 +6.61831114E-01 +8.94068490E-01 
C  +5.36472780E-03 +3.32837466E+00 +1.71949817E-02 
C  +1.28401543E+00 +2.48728887E+00 +4.25808315E-01 
H  -2.77831270E-01 +3.90783880E+00 +8.96933862E-01 
H  +2.90369423E-01 +3.91526081E+00 -8.57020418E-01 
H  +1.53268711E+00 +2.58970962E+00 +1.48352561E+00 
H  +2.10824619E+00 +2.59518299E+00 -2.80437706E-01 
61
Ru-2_isom-1_M06-2X
Ru -1.73443919E-02 +1.21106182E+00 +8.87187765E-01 
Cl -4.90200206E-01 +3.26702812E+00 +2.16543150E+00 
Cl -1.39587367E+00 +1.93668562E+00 -8.09955011E-01 
C  +7.37233175E-02 +3.15057762E-01 +2.61445580E+00 
C  +1.52399829E+00 +9.08066223E-01 +2.42303296E+00 
H  +2.22026650E+00 +7.00430037E-02 +2.44738863E+00 
C  +1.83891819E+00 +1.70406450E+00 +1.08926551E+00 
H  +1.64093239E+00 +1.64212300E+00 +3.22211537E+00 
H  +1.95885662E+00 +2.76986327E+00 +1.28704259E+00 
H  +2.62905709E+00 +1.25014695E+00 +4.97238420E-01 
H  -4.60325667E-01 +8.15788153E-01 +3.42353651E+00 
H  +7.51979570E-02 -7.75088191E-01 +2.67463114E+00 
C  +8.99902442E-01 -2.79791110E+00 -6.12345302E-01 
C  -5.99353230E-01 -2.86643228E+00 -3.63545774E-01 
N  +1.22913942E+00 -1.46200755E+00 -9.23586611E-02 
C  +1.34434253E-01 -6.64815661E-01 +5.51465600E-02 
N  -9.43368825E-01 -1.45070399E+00 -1.71132766E-01 
H  -1.16801614E+00 -3.29272729E+00 -1.19939259E+00 
H  +1.15516420E+00 -2.84550083E+00 -1.68455678E+00 
H  -8.49704776E-01 -3.43015870E+00 +5.50350587E-01 
H  +1.46799098E+00 -3.57306058E+00 -8.21856370E-02 
C  +2.57144610E+00 -1.01070741E+00 -2.84870776E-01 
C  +3.55576791E+00 -1.38649043E+00 +6.36203188E-01 
C  +2.88281481E+00 -2.48613922E-01 -1.42732626E+00 
C  +4.86354262E+00 -9.31348737E-01 +4.30489940E-01 
C  +4.20004440E+00 +1.72329050E-01 -1.59469275E+00 
C  +5.20297821E+00 -1.48182625E-01 -6.71136300E-01 
H  +5.63560474E+00 -1.20025319E+00 +1.15540629E+00 
H  +4.45222857E+00 +7.75483679E-01 -2.47040866E+00 
C  -2.33182257E+00 -1.08941817E+00 -2.58674564E-01 
C  -3.14961897E+00 -1.07081549E+00 +8.72993009E-01 
C  -2.85205402E+00 -8.54961032E-01 -1.54608332E+00 
C  -4.50113332E+00 -7.41597352E-01 +7.02587468E-01 
C  -4.20059783E+00 -5.44061099E-01 -1.66625596E+00 
C  -5.04071864E+00 -4.64512831E-01 -5.48467712E-01 
H  -5.14618685E+00 -7.09376612E-01 +1.58394378E+00 
H  -4.60866222E+00 -3.40665119E-01 -2.65922437E+00 
C  -1.95684739E+00 -8.77979628E-01 -2.75433730E+00 
H  -1.24033229E+00 -4.51796893E-02 -2.69350106E+00 
H  -1.38347382E+00 -1.81505191E+00 -2.83171548E+00 
H  -2.54517705E+00 -7.64611017E-01 -3.67312832E+00 
C  -2.64367399E+00 -1.38617513E+00 +2.25533194E+00 
H  -1.73395169E+00 -1.99878085E+00 +2.23189154E+00 
H  -2.41273893E+00 -4.61443070E-01 +2.80463464E+00 
H  -3.41149162E+00 -1.92721263E+00 +2.82382062E+00 
C  -6.48689360E+00 -7.91105020E-02 -7.10249002E-01 
H  -6.57111529E+00 +9.85499049E-01 -9.75616529E-01 
H  -6.96384100E+00 -6.58515409E-01 -1.51356622E+00 
H  -7.05062657E+00 -2.41921287E-01 +2.17289295E-01 
C  +1.81670271E+00 +1.45474343E-01 -2.41362104E+00 
H  +2.26876071E+00 +5.33967052E-01 -3.33411411E+00 
H  +1.17558372E+00 -7.08584888E-01 -2.67676617E+00 
H  +1.15519350E+00 +9.21912820E-01 -1.99666694E+00 
C  +3.24140990E+00 -2.26441040E+00 +1.82095711E+00 
H  +3.48268235E+00 -3.31627280E+00 +1.60153125E+00 
H  +3.84085561E+00 -1.96872608E+00 +2.69276712E+00 
H  +2.17884685E+00 -2.21374010E+00 +2.09425170E+00 
C  +6.61016076E+00 +3.46472906E-01 -8.77463831E-01 
H  +7.28266687E+00 -2.09990675E-02 -9.20523299E-02 
H  +7.00251799E+00 +1.51404199E-02 -1.84982627E+00 
H  +6.64085457E+00 +1.44591692E+00 -8.68184438E-01 
61
Ru-2_isom-2_M06-2X
C  -6.71976520E-01 -2.99595790E+00 +3.36672251E-01 
C  +8.49899859E-01 -2.98518885E+00 +1.68365121E-01 
N  -1.00866586E+00 -1.59055499E+00 +9.54073679E-02 
C  +6.25917333E-02 -7.81804290E-01 +1.52357203E-01 
N  +1.16993639E+00 -1.55475503E+00 +2.85709488E-01 
H  +1.16111475E+00 -3.35487400E+00 -8.21032467E-01 
H  -1.18567246E+00 -3.64734983E+00 -3.81890650E-01 
H  +1.37535732E+00 -3.56096695E+00 +9.41411164E-01 
H  -9.81878955E-01 -3.28062493E+00 +1.35564161E+00 
C  +2.51525800E+00 -1.09485146E+00 +8.82107392E-02 
C  +3.34076290E+00 -8.50273800E-01 +1.19617819E+00 
C  +2.99523070E+00 -9.37058637E-01 -1.22669620E+00 
C  +4.59788485E+00 -2.79957575E-01 +9.68048367E-01 
C  +4.25289669E+00 -3.61752885E-01 -1.40067468E+00 
C  +5.05427005E+00 +9.43188270E-03 -3.16547967E-01 
H  +5.24005302E+00 -6.74179271E-02 +1.82683256E+00 
H  +4.61976941E+00 -2.04977698E-01 -2.41794626E+00 
C  -2.36431011E+00 -1.12882240E+00 +4.63627588E-02 
C  -3.04172079E+00 -8.22437478E-01 +1.23115092E+00 
C  -2.97616475E+00 -1.01948620E+00 -1.21593246E+00 
C  -4.36539088E+00 -3.84521522E-01 +1.13008682E+00 
C  -4.29306711E+00 -5.70860388E-01 -1.26376126E+00 
C  -5.00093714E+00 -2.43220749E-01 -1.01077194E-01 
H  -4.90249662E+00 -1.23389112E-01 +2.04518997E+00 
H  -4.78178841E+00 -4.71975988E-01 -2.23584245E+00 
C  +2.24732132E+00 -1.45643967E+00 -2.42779528E+00 
H  +2.41668300E+00 -8.07465956E-01 -3.29525695E+00 
H  +2.61568547E+00 -2.46592416E+00 -2.67583164E+00 
H  +1.16388843E+00 -1.49884441E+00 -2.26824965E+00 
C  +2.97127871E+00 -1.23918016E+00 +2.60663713E+00 
H  +3.77685379E+00 -1.85043844E+00 +3.03682339E+00 
H  +2.84730412E+00 -3.55018265E-01 +3.24869666E+00 
H  +2.03997553E+00 -1.81656170E+00 +2.64732237E+00 
C  -2.22115903E+00 -1.36964953E+00 -2.47020804E+00 
H  -1.38725542E+00 -6.69357328E-01 -2.63419956E+00 
H  -1.79603454E+00 -2.38386918E+00 -2.41302563E+00 
H  -2.88497037E+00 -1.32728744E+00 -3.34246652E+00 
C  -2.38813181E+00 -9.00805244E-01 +2.58485655E+00 
H  -1.34265013E+00 -1.22987677E+00 +2.53098997E+00 
H  -2.39342979E+00 +9.77325261E-02 +3.04641641E+00 
H  -2.94022379E+00 -1.58574583E+00 +3.24470269E+00 
Ru -1.73843845E-01 +1.16255415E+00 +5.84344953E-02 
Cl +4.98883281E-01 +1.17436858E+00 -2.22528618E+00 
Cl -1.86096052E+00 +2.32300011E+00 +1.15166276E+00 
C  +1.56597936E+00 +2.16388928E+00 +4.03749703E-01 
C  +1.58907420E+00 +2.07919088E+00 +1.91144642E+00 
C  +5.46113286E-01 +9.71716130E-01 +2.02911748E+00 
H  +2.57331364E+00 +1.82814121E+00 +2.33346362E+00 
H  +9.79335274E-01 -7.75943600E-03 +2.20574106E+00 
H  +2.39213569E+00 +1.68316267E+00 -1.27533568E-01 
H  +1.22869127E+00 +3.00565456E+00 +2.37114491E+00 
H  +1.35152729E+00 +3.15010549E+00 -3.23251602E-02 
H  -2.52503345E-01 +1.16262723E+00 +2.74740054E+00 
C  -6.40818106E+00 +2.84136502E-01 -1.91377695E-01 
H  -6.98419338E+00 -2.48707174E-01 -9.60523803E-01 
H  -6.93364335E+00 +1.88068718E-01 +7.67574743E-01 
H  -6.39699880E+00 +1.35067044E+00 -4.63709687E-01 
C  +6.37955533E+00 +6.87977385E-01 -5.39513562E-01 
H  +7.02107909E+00 +6.14493818E-01 +3.48307014E-01 
H  +6.91303986E+00 +2.47435693E-01 -1.39294137E+00 
H  +6.22960518E+00 +1.75615403E+00 -7.59566599E-01 
60
Ru-4_M06-2X
Ru -2.95040721E-01 +1.01999232E+00 +7.05360737E-01 
Cl -1.51727543E+00 +3.06268534E+00 +1.67396622E+00 
Cl -1.08459177E+00 +1.83330049E+00 -1.52221290E+00 
C  +2.02720961E-01 +7.05863717E-01 +2.79512544E+00 
C  +1.34913043E+00 +8.15772901E-01 +1.97645466E+00 
H  +1.97688581E+00 -5.84903007E-02 +1.84286731E+00 
C  +1.52873912E+00 +1.92823256E+00 +1.09648945E+00 
H  +1.26392108E+00 +2.93490438E+00 +1.42259051E+00 
H  +2.34188587E+00 +1.86561319E+00 +3.71046369E-01 
H  -2.32500156E-01 +1.57295606E+00 +3.28632352E+00 
H  +4.72941626E-02 -2.54711012E-01 +3.29070966E+00 
C  +9.61313203E-01 -2.79185783E+00 -7.89033652E-01 
C  -5.34612473E-01 -2.92969294E+00 -5.72624115E-01 
N  +1.24660349E+00 -1.53146949E+00 -9.54783203E-02 
C  +1.14552635E-01 -7.23148411E-01 +2.96132000E-03 
N  -9.17896312E-01 -1.53275911E+00 -4.30425730E-01 
H  -1.05634540E+00 -3.40828570E+00 -1.41248728E+00 
H  +1.20680871E+00 -2.69388680E+00 -1.86276806E+00 
H  -7.64951364E-01 -3.49174821E+00 +3.52544839E-01 
H  +1.54375617E+00 -3.62314565E+00 -3.69207092E-01 
C  +2.58962649E+00 -1.05994776E+00 -2.24730303E-01 
C  +3.55148395E+00 -1.55737274E+00 +6.74311371E-01 
C  +2.95647617E+00 -2.03507551E-01 -1.27383966E+00 
C  +4.87714488E+00 -1.15037756E+00 +5.36643635E-01 
C  +4.30109857E+00 +1.77466435E-01 -1.37245969E+00 
C  +5.26983294E+00 -2.72971518E-01 -4.78589089E-01 
H  +5.62148523E+00 -1.52213181E+00 +1.24617155E+00 
H  +4.59201231E+00 +8.49126749E-01 -2.18460386E+00 
C  -2.30213892E+00 -1.18122570E+00 -3.71755600E-01 
C  -2.97954052E+00 -1.08113219E+00 +8.49129812E-01 
C  -2.97172353E+00 -9.77085584E-01 -1.59549259E+00 
C  -4.32752508E+00 -6.95838565E-01 +8.27956890E-01 
C  -4.31352484E+00 -6.18551520E-01 -1.56642851E+00 
C  -5.00335390E+00 -4.47867003E-01 -3.59854889E-01 
H  -4.85243076E+00 -5.83422870E-01 +1.78040585E+00 
H  -4.83018976E+00 -4.32938590E-01 -2.51163598E+00 
C  -2.22894822E+00 -1.08971457E+00 -2.89732169E+00 
H  -1.45582222E+00 -3.06286301E-01 -2.92610262E+00 
H  -1.73887447E+00 -2.06944330E+00 -3.01040853E+00 
H  -2.91293795E+00 -9.47280044E-01 -3.74453264E+00 
C  -2.33957814E+00 -1.39165438E+00 +2.17771778E+00 
H  -1.32272229E+00 -1.78649407E+00 +2.06500441E+00 
H  -2.26471204E+00 -4.76765332E-01 +2.78288043E+00 
H  -2.95397000E+00 -2.12452312E+00 +2.72325545E+00 
C  -6.43152330E+00 +3.09419199E-02 -3.58893148E-01 
H  -6.46563884E+00 +1.12098969E+00 -5.10407584E-01 
H  -7.01143030E+00 -4.36059067E-01 -1.16830200E+00 
H  -6.92666834E+00 -1.89444669E-01 +5.96732827E-01 
C  +1.95043563E+00 +3.14339274E-01 -2.26019493E+00 
H  +2.44954358E+00 +6.45112283E-01 -3.18074036E+00 
H  +1.19716372E+00 -4.44562940E-01 -2.51694347E+00 
H  +1.37323867E+00 +1.15326298E+00 -1.84039903E+00 
C  +3.14625232E+00 -2.48829334E+00 +1.78692384E+00 
H  +2.85552257E+00 -3.47864392E+00 +1.40289699E+00 
H  +3.97457538E+00 -2.63106122E+00 +2.49357831E+00 
H  +2.27687825E+00 -2.09088767E+00 +2.33215471E+00 
C  +6.70142851E+00 +1.86907339E-01 -5.83218152E-01 
H  +7.40189413E+00 -6.39963149E-01 -3.95986211E-01 
H  +6.91387331E+00 +6.01354073E-01 -1.57811810E+00 
H  +6.91288878E+00 +9.73221803E-01 +1.58291932E-01 
60
Ru-4_isom-1_M06-2X
Ru -3.80550734E-01 +1.02432054E+00 +7.86240344E-01 
Cl -2.15289163E+00 +2.33820137E+00 +2.04613104E+00 
Cl -1.09471069E+00 +2.01458646E+00 -1.39754855E+00 
C  +3.98903288E-01 +2.75246921E-01 +2.67053651E+00 
C  +9.03033717E-01 +1.54521160E+00 +2.29437561E+00 
C  +1.57324116E+00 +1.70462601E+00 +1.03217358E+00 
H  +5.02967856E-01 +2.42301022E+00 +2.80186849E+00 
H  +1.71639070E+00 +2.73276747E+00 +6.91058880E-01 
H  +2.38609703E+00 +1.04038693E+00 +7.58842824E-01 
H  -2.83648110E-01 +2.50281673E-01 +3.52043419E+00 
H  +9.75722184E-01 -6.33215347E-01 +2.50200879E+00 
C  +9.84053657E-01 -2.81259037E+00 -5.56109666E-01 
C  -5.28879970E-01 -2.90497651E+00 -4.51484413E-01 
N  +1.25855878E+00 -1.50686817E+00 +5.64882755E-02 
C  +1.32743519E-01 -6.86987925E-01 +7.13251802E-02 
N  -8.90720796E-01 -1.49745938E+00 -3.79231372E-01 
H  -9.96446101E-01 -3.39525168E+00 -1.31708280E+00 
H  +1.31994239E+00 -2.81153933E+00 -1.60893246E+00 
H  -8.49101297E-01 -3.43317876E+00 +4.66025388E-01 
H  +1.51243756E+00 -3.61724805E+00 -2.44791317E-02 
C  +2.59752119E+00 -1.04729537E+00 -1.48236429E-01 
C  +3.58487746E+00 -1.38568308E+00 +7.84178271E-01 
C  +2.91648867E+00 -3.31370954E-01 -1.32059321E+00 
C  +4.90288253E+00 -9.78936432E-01 +5.42567534E-01 
C  +4.24041084E+00 +5.85574798E-02 -1.51346725E+00 
C  +5.24745955E+00 -2.51215631E-01 -5.92842959E-01 
H  +5.67568944E+00 -1.23508712E+00 +1.27255344E+00 
H  +4.49217781E+00 +6.28405549E-01 -2.41216639E+00 
C  -2.27531551E+00 -1.13376011E+00 -3.73458830E-01 
C  -3.00923596E+00 -1.07261401E+00 +8.17603040E-01 
C  -2.88082091E+00 -8.81231707E-01 -1.61984938E+00 
C  -4.35225504E+00 -6.81464948E-01 +7.42272700E-01 
C  -4.22165549E+00 -5.17590586E-01 -1.64541225E+00 
C  -4.96768479E+00 -3.87832394E-01 -4.68153703E-01 
H  -4.91792328E+00 -5.85705557E-01 +1.67267522E+00 
H  -4.69025778E+00 -2.94959358E-01 -2.60752046E+00 
C  -2.07151172E+00 -9.49523698E-01 -2.88448219E+00 
H  -1.33249986E+00 -1.33111731E-01 -2.87163319E+00 
H  -1.53173937E+00 -1.90503914E+00 -2.97797686E+00 
H  -2.71833416E+00 -8.28556997E-01 -3.76381616E+00 
C  -2.42939287E+00 -1.39132348E+00 +2.17079302E+00 
H  -1.40897334E+00 -1.78865287E+00 +2.10776620E+00 
H  -2.38504546E+00 -4.65594875E-01 +2.76488467E+00 
H  -3.07103067E+00 -2.11951348E+00 +2.69037968E+00 
C  -6.38908793E+00 +1.08351037E-01 -5.14548166E-01 
H  -6.40256292E+00 +1.20922990E+00 -5.37314182E-01 
H  -6.91125743E+00 -2.51353661E-01 -1.41298657E+00 
H  -6.95469074E+00 -2.13387820E-01 +3.70846394E-01 
C  +1.85030233E+00 +6.57237093E-02 -2.30234295E+00 
H  +2.30072617E+00 +4.13331918E-01 -3.24121834E+00 
H  +1.17012556E+00 -7.69191793E-01 -2.52842015E+00 
H  +1.21350761E+00 +8.67327194E-01 -1.88961272E+00 
C  +3.25281926E+00 -2.11237732E+00 +2.06129438E+00 
H  +2.36036590E+00 -2.74062365E+00 +1.95675913E+00 
H  +4.09827974E+00 -2.73537210E+00 +2.38452198E+00 
H  +3.03946015E+00 -1.38588984E+00 +2.86114710E+00 
C  +6.66440348E+00 +2.03160525E-01 -8.33211506E-01 
H  +7.34424808E+00 -1.87186556E-01 -6.38220026E-02 
H  +7.02806958E+00 -1.33197616E-01 -1.81583640E+00 
H  +6.72981739E+00 +1.30173288E+00 -8.18261196E-01 
60
Ru-4_isom-2_M06-2X
C  -6.42965740E-01 -2.98623123E+00 -5.35139534E-01 
C  +8.32012484E-01 -3.03247495E+00 -1.39558327E-01 
N  -9.99868660E-01 -1.61515816E+00 -1.73342888E-01 
C  +7.91339129E-02 -7.94184271E-01 -2.02475650E-03 
N  +1.16851854E+00 -1.60999842E+00 -7.51610965E-02 
H  +1.45809702E+00 -3.55358815E+00 -8.76841867E-01 
H  -7.77382159E-01 -3.14543743E+00 -1.61838778E+00 
H  +9.86249291E-01 -3.50686887E+00 +8.47081188E-01 
H  -1.26206064E+00 -3.71094274E+00 +1.28828746E-02 
C  +2.51128445E+00 -1.22338909E+00 +2.09944274E-01 
C  +2.90828404E+00 -1.03704601E+00 +1.54067606E+00 
C  +3.40908735E+00 -1.06474209E+00 -8.55043321E-01 
C  +4.23578940E+00 -6.75446427E-01 +1.78843806E+00 
C  +4.72463645E+00 -7.01349763E-01 -5.61636979E-01 
C  +5.15342252E+00 -4.97204194E-01 +7.52160866E-01 
H  +4.55420983E+00 -5.18634389E-01 +2.82253299E+00 
H  +5.42863603E+00 -5.59620346E-01 -1.38613303E+00 
C  -2.35745373E+00 -1.22029754E+00 +1.74220108E-02 
C  -2.83030052E+00 -1.11353474E+00 +1.33857461E+00 
C  -3.20967881E+00 -1.02438524E+00 -1.07919258E+00 
C  -4.14844273E+00 -7.06335480E-01 +1.54069865E+00 
C  -4.52540311E+00 -6.21500922E-01 -8.26468807E-01 
C  -5.00371550E+00 -4.34745532E-01 +4.69602113E-01 
H  -4.51518821E+00 -6.00295828E-01 +2.56488134E+00 
H  -5.18983203E+00 -4.43456438E-01 -1.67633594E+00 
C  +2.93663558E+00 -1.22528102E+00 -2.27262826E+00 
H  +3.75765113E+00 -1.04168659E+00 -2.97877559E+00 
H  +2.54623033E+00 -2.23908634E+00 -2.45580829E+00 
H  +2.11124737E+00 -5.23863099E-01 -2.47997029E+00 
C  +1.91445694E+00 -1.15076804E+00 +2.66187387E+00 
H  +1.28672419E+00 -2.04846276E+00 +2.56027086E+00 
H  +2.42576386E+00 -1.18890960E+00 +3.63308978E+00 
H  +1.23816152E+00 -2.78376454E-01 +2.65205064E+00 
C  -2.74678289E+00 -1.28709434E+00 -2.48578791E+00 
H  -1.70965961E+00 -9.53696908E-01 -2.62845222E+00 
H  -2.81828778E+00 -2.36398406E+00 -2.71654103E+00 
H  -3.37897920E+00 -7.49169179E-01 -3.20512695E+00 
C  -1.93832954E+00 -1.46688500E+00 +2.49574720E+00 
H  -1.13464363E+00 -7.22742246E-01 +2.59718868E+00 
H  -2.51177769E+00 -1.48460097E+00 +3.43199054E+00 
H  -1.47926320E+00 -2.45737389E+00 +2.34435263E+00 
Ru +2.25853021E-02 +1.22381076E+00 -4.58725007E-02 
Cl -4.33806844E-02 +8.94957735E-01 -2.54423104E+00 
Cl -4.41270170E-01 +1.63625026E+00 +2.37055540E+00 
C  +1.57949830E-01 +3.47897014E+00 -6.09289026E-01 
C  +1.22633048E+00 +3.00231164E+00 +1.38188135E-01 
C  +1.99021262E+00 +1.84195892E+00 -2.57344798E-01 
H  +2.28559615E+00 +1.72877503E+00 -1.30393631E+00 
H  +1.15279799E-01 +3.36971030E+00 -1.69025969E+00 
H  +1.29634186E+00 +3.31556478E+00 +1.18033163E+00 
H  -5.16301724E-01 +4.20023722E+00 -1.48652442E-01 
H  +2.73753018E+00 +1.49384084E+00 +4.59256288E-01 
C  -6.40477976E+00 +6.34791128E-02 +7.15441808E-01 
H  -7.05486960E+00 -1.27691832E-01 -1.49679017E-01 
H  -6.85063469E+00 -4.17606505E-01 +1.59799201E+00 
H  -6.40160717E+00 +1.14956918E+00 +8.98434671E-01 
C  +6.56577759E+00 -5.33792994E-02 +1.03728645E+00 
H  +6.86110499E+00 -2.99203613E-01 +2.06681451E+00 
H  +7.28059977E+00 -5.27415258E-01 +3.49345623E-01 
H  +6.66131837E+00 +1.03700934E+00 +9.13916495E-01 
60
Ru-4_isom-3_M06-2X
Ru -5.61695869E-01 +8.92164952E-01 +5.08459121E-01 
Cl -6.07945168E-01 +4.19884710E-01 +2.92214852E+00 
Cl -1.07117235E+00 +2.02256872E+00 -1.60999878E+00 
C  +3.43409531E+00 +2.15980920E+00 +1.47873209E+00 
C  +2.13916526E+00 +1.87684549E+00 +1.66962447E+00 
C  +1.07126777E+00 +2.07333923E+00 +6.49443393E-01 
H  +1.81788134E+00 +1.50045127E+00 +2.64318510E+00 
H  +4.55439977E-01 +2.95202896E+00 +9.67451927E-01 
H  +1.50824937E+00 +2.34296984E+00 -3.24820185E-01 
H  +4.17294307E+00 +2.00575091E+00 +2.26660914E+00 
H  +3.79667640E+00 +2.53424924E+00 +5.19087890E-01 
C  +8.43876440E-01 -2.84284652E+00 -7.78851429E-01 
C  -6.70749359E-01 -3.02063588E+00 -7.53114750E-01 
N  +1.00818398E+00 -1.55006000E+00 -1.16439925E-01 
C  -1.43685846E-01 -7.97200609E-01 -1.33792005E-01 
N  -1.11314508E+00 -1.63559368E+00 -6.76729780E-01 
H  -1.06230161E+00 -3.51691688E+00 -1.65283843E+00 
H  +1.23300691E+00 -2.80235629E+00 -1.81283100E+00 
H  -9.94509420E-01 -3.59116169E+00 +1.36690242E-01 
H  +1.38254740E+00 -3.63266483E+00 -2.35896405E-01 
C  +2.33613157E+00 -1.04617424E+00 +3.39848700E-03 
C  +3.06574336E+00 -1.37461376E+00 +1.15238778E+00 
C  +2.91255999E+00 -3.39415685E-01 -1.06208061E+00 
C  +4.41407357E+00 -1.01776615E+00 +1.20503500E+00 
C  +4.26059464E+00 +9.58625870E-03 -9.60715058E-01 
C  +5.02494803E+00 -3.24549406E-01 +1.59702660E-01 
H  +4.99221618E+00 -1.26069268E+00 +2.10087294E+00 
H  +4.72299137E+00 +5.67999891E-01 -1.77966228E+00 
C  -2.50176646E+00 -1.31616467E+00 -5.70309267E-01 
C  -3.17795995E+00 -1.45708485E+00 +6.50570466E-01 
C  -3.16983041E+00 -8.86202984E-01 -1.73268147E+00 
C  -4.52566292E+00 -1.07611749E+00 +7.04393854E-01 
C  -4.51213445E+00 -5.32227077E-01 -1.63291856E+00 
C  -5.20012533E+00 -5.99417772E-01 -4.15869321E-01 
H  -5.05441388E+00 -1.15881909E+00 +1.65786733E+00 
H  -5.03247962E+00 -1.78488618E-01 -2.52689330E+00 
C  -2.43599138E+00 -8.16282889E-01 -3.04249245E+00 
H  -1.63870915E+00 -6.13681760E-02 -2.97700172E+00 
H  -1.97285920E+00 -1.78490257E+00 -3.28752225E+00 
H  -3.12168782E+00 -5.39504366E-01 -3.85464118E+00 
C  -2.53025797E+00 -2.07093892E+00 +1.86475958E+00 
H  -1.43727731E+00 -1.98825899E+00 +1.84428939E+00 
H  -2.85805718E+00 -1.55663959E+00 +2.77708229E+00 
H  -2.81600655E+00 -3.13438793E+00 +1.93873365E+00 
C  -6.63402640E+00 -1.43858239E-01 -3.25979676E-01 
H  -6.68927117E+00 +9.55950377E-01 -3.18796270E-01 
H  -7.22004012E+00 -4.97302626E-01 -1.18706113E+00 
H  -7.11250542E+00 -5.09774733E-01 +5.92775999E-01 
C  +2.08808057E+00 +5.05155875E-02 -2.25849003E+00 
H  +2.72253229E+00 +4.81027824E-01 -3.04463924E+00 
H  +1.55034888E+00 -8.12453694E-01 -2.68076213E+00 
H  +1.31533167E+00 +7.85410782E-01 -1.97848487E+00 
C  +2.37563069E+00 -2.04324855E+00 +2.30974251E+00 
H  +1.54996652E+00 -1.40514544E+00 +2.66745930E+00 
H  +1.93268707E+00 -3.00864615E+00 +2.01815540E+00 
H  +3.07939591E+00 -2.21941279E+00 +3.13437977E+00 
C  +6.45536454E+00 +1.34546526E-01 +2.73253849E-01 
H  +7.03926106E+00 -5.25782824E-01 +9.29974210E-01 
H  +6.94652290E+00 +1.69983994E-01 -7.09709095E-01 
H  +6.49375335E+00 +1.15029554E+00 +7.01156203E-01 
60
Ru-4_isom-4_M06-2X
Ru -4.75354437E-01 +9.06275820E-01 +3.46042836E-01 
Cl -6.12927152E-01 +5.86449615E-01 +2.76900751E+00 
Cl -9.46144136E-01 +1.95316865E+00 -1.82682956E+00 
C  +2.47522559E+00 +2.03874577E+00 +2.62122969E+00 
C  +2.36729158E+00 +1.78316298E+00 +1.31012287E+00 
H  +3.23503472E+00 +1.34466721E+00 +8.14703667E-01 
C  +1.20207675E+00 +2.05860189E+00 +4.31126395E-01 
H  +6.60932059E-01 +2.96176510E+00 +7.93483531E-01 
H  +1.54092834E+00 +2.27181524E+00 -5.92320873E-01 
H  +1.64149865E+00 +2.44753905E+00 +3.19170213E+00 
H  +3.39106866E+00 +1.79533019E+00 +3.16233955E+00 
C  +8.54063722E-01 -2.91733443E+00 -7.60902977E-01 
C  -6.62948525E-01 -3.06735419E+00 -6.96201260E-01 
N  +1.05226262E+00 -1.59043522E+00 -1.82076604E-01 
C  -8.94877215E-02 -8.20203764E-01 -2.08979871E-01 
N  -1.08319703E+00 -1.67367380E+00 -6.82681952E-01 
H  -1.07989178E+00 -3.60201528E+00 -1.56193136E+00 
H  +1.22376842E+00 -2.94937416E+00 -1.80225040E+00 
H  -9.76777792E-01 -3.58782539E+00 +2.26939406E-01 
H  +1.38941939E+00 -3.68185447E+00 -1.79496576E-01 
C  +2.38799401E+00 -1.10303840E+00 -1.03218810E-01 
C  +3.11030924E+00 -1.33241831E+00 +1.07427514E+00 
C  +2.96948464E+00 -4.80325987E-01 -1.21809902E+00 
C  +4.46093167E+00 -9.75140796E-01 +1.10302817E+00 
C  +4.31808621E+00 -1.24100242E-01 -1.14048033E+00 
C  +5.07978570E+00 -3.73758176E-01 +5.28558220E-03 
H  +5.03397299E+00 -1.14591529E+00 +2.01832710E+00 
H  +4.78413466E+00 +3.65622261E-01 -2.00001063E+00 
C  -2.46434789E+00 -1.32719587E+00 -5.62896873E-01 
C  -3.12014785E+00 -1.41658195E+00 +6.74225515E-01 
C  -3.14716437E+00 -9.26709895E-01 -1.72697092E+00 
C  -4.45958996E+00 -1.01098998E+00 +7.39921191E-01 
C  -4.48138650E+00 -5.45288557E-01 -1.61435563E+00 
C  -5.14668827E+00 -5.58930181E-01 -3.83373538E-01 
H  -4.97131311E+00 -1.05212421E+00 +1.70519615E+00 
H  -5.01305989E+00 -2.14614125E-01 -2.51049193E+00 
C  -2.44004441E+00 -9.21525936E-01 -3.05325887E+00 
H  -1.63112990E+00 -1.76398250E-01 -3.03752608E+00 
H  -1.99564521E+00 -1.90645252E+00 -3.26591024E+00 
H  -3.13914250E+00 -6.69381288E-01 -3.86201719E+00 
C  -2.45819258E+00 -2.00206025E+00 +1.89441795E+00 
H  -1.36658702E+00 -1.90356742E+00 +1.86450610E+00 
H  -2.78830078E+00 -1.47640961E+00 +2.79907525E+00 
H  -2.72902109E+00 -3.06814865E+00 +1.98723302E+00 
C  -6.56996041E+00 -7.35805154E-02 -2.81215680E-01 
H  -6.60291892E+00 +1.02716817E+00 -2.86362582E-01 
H  -7.17386480E+00 -4.25219856E-01 -1.13052396E+00 
H  -7.04388437E+00 -4.18497098E-01 +6.48002764E-01 
C  +2.14255728E+00 -1.66765397E-01 -2.43504046E+00 
H  +2.77329323E+00 +2.24006972E-01 -3.24444991E+00 
H  +1.61187983E+00 -1.05647209E+00 -2.80686432E+00 
H  +1.36614068E+00 +5.78830232E-01 -2.19432811E+00 
C  +2.40519066E+00 -1.86375004E+00 +2.29053578E+00 
H  +1.89474052E+00 -2.81693925E+00 +2.08461739E+00 
H  +3.11219313E+00 -2.01320442E+00 +3.11757007E+00 
H  +1.63209414E+00 -1.14002558E+00 +2.60352706E+00 
C  +6.52164988E+00 +6.13483580E-02 +7.48174273E-02 
H  +7.02076863E+00 -5.02276719E-02 -8.98353966E-01 
H  +6.59106175E+00 +1.12227579E+00 +3.63724769E-01 
H  +7.07937906E+00 -5.23444768E-01 +8.19436490E-01 
60
Ru-4_isom-5_M06-2X
C  -6.59933094E-01 -2.99330918E+00 -4.95031681E-01 
C  +8.25563789E-01 -3.04047385E+00 -1.42346585E-01 
N  -1.00501623E+00 -1.60718053E+00 -1.65878487E-01 
C  +7.35025609E-02 -8.00725729E-01 -9.02618440E-03 
N  +1.15918874E+00 -1.61542913E+00 -8.45411701E-02 
H  +1.43203626E+00 -3.55868165E+00 -8.97706489E-01 
H  -8.31828586E-01 -3.18104201E+00 -1.56751412E+00 
H  +1.01282254E+00 -3.51287715E+00 +8.39186174E-01 
H  -1.26959586E+00 -3.69411245E+00 +9.24575748E-02 
C  +2.50278173E+00 -1.22769978E+00 +1.92456792E-01 
C  +2.90132005E+00 -1.02084901E+00 +1.51843956E+00 
C  +3.39507355E+00 -1.07659128E+00 -8.78115284E-01 
C  +4.23604944E+00 -6.83965712E-01 +1.76259602E+00 
C  +4.71715726E+00 -7.35473902E-01 -5.89866152E-01 
C  +5.15583247E+00 -5.39695876E-01 +7.22891220E-01 
H  +4.55817093E+00 -5.14533787E-01 +2.79354685E+00 
H  +5.41914673E+00 -6.00178778E-01 -1.41715257E+00 
C  -2.37046267E+00 -1.23103833E+00 +2.65579468E-02 
C  -2.84025373E+00 -1.12538996E+00 +1.34590811E+00 
C  -3.22326529E+00 -1.06107128E+00 -1.07156941E+00 
C  -4.17047852E+00 -7.64791485E-01 +1.54817428E+00 
C  -4.54979881E+00 -6.96822887E-01 -8.19152618E-01 
C  -5.03365855E+00 -5.25248094E-01 +4.76877709E-01 
H  -4.53467454E+00 -6.49716917E-01 +2.57207275E+00 
H  -5.21794447E+00 -5.34754361E-01 -1.66925909E+00 
C  +2.89808124E+00 -1.20098909E+00 -2.29126509E+00 
H  +3.71173999E+00 -1.02402827E+00 -3.00718487E+00 
H  +2.47754993E+00 -2.19990821E+00 -2.48708384E+00 
H  +2.08693727E+00 -4.74353246E-01 -2.47368047E+00 
C  +1.89307582E+00 -1.06395068E+00 +2.63349703E+00 
H  +1.24831548E+00 -1.95266650E+00 +2.57149510E+00 
H  +2.38954511E+00 -1.05575338E+00 +3.61267411E+00 
H  +1.22698713E+00 -1.86198957E-01 +2.56726253E+00 
C  -2.74899518E+00 -1.30090104E+00 -2.47879000E+00 
H  -1.71917420E+00 -9.43268310E-01 -2.61696394E+00 
H  -2.80146861E+00 -2.37574158E+00 -2.72483743E+00 
H  -3.38696721E+00 -7.64595030E-01 -3.19412000E+00 
C  -1.92326328E+00 -1.40157572E+00 +2.50435010E+00 
H  -1.16193306E+00 -6.10745239E-01 +2.56427449E+00 
H  -2.48520019E+00 -1.40925865E+00 +3.44751966E+00 
H  -1.41713804E+00 -2.37410196E+00 +2.38693073E+00 
Ru +1.30968010E-01 +1.29738022E+00 -3.72051750E-02 
Cl -1.53388272E-01 +1.01133480E+00 -2.65825664E+00 
Cl -1.41423157E+00 +1.88501278E+00 +1.89596217E+00 
C  +3.35706497E-01 +3.46439409E+00 -4.74219044E-01 
C  +1.41991237E+00 +2.99697040E+00 +2.87324162E-01 
C  +2.24028492E+00 +1.93104495E+00 -1.79869802E-01 
H  +2.43186953E+00 +1.83941298E+00 -1.25133717E+00 
H  +3.79846781E-01 +3.46421324E+00 -1.56219250E+00 
H  +1.44956486E+00 +3.24854814E+00 +1.35056590E+00 
H  -3.81380070E-01 +4.13353562E+00 -2.20100340E-03 
H  +3.01397971E+00 +1.53118419E+00 +4.74547382E-01 
C  -6.44661676E+00 -6.26115673E-02 +7.22861342E-01 
H  -7.08776338E+00 -2.51505413E-01 -1.49467926E-01 
H  -6.88732976E+00 -5.68599645E-01 +1.59416979E+00 
H  -6.46482123E+00 +1.01968950E+00 +9.25711661E-01 
C  +6.58023302E+00 -1.29755824E-01 +9.97847709E-01 
H  +6.83625726E+00 -2.63921352E-01 +2.05773197E+00 
H  +7.28839630E+00 -7.16039877E-01 +3.94439376E-01 
H  +6.73267784E+00 +9.31703752E-01 +7.46905540E-01 
60
Ru-4_isom-6_M06-2X
Ru -3.35892027E-01 +9.31691834E-01 +6.48675309E-01 
Cl -2.07646576E+00 +2.21203800E+00 +1.78207509E+00 
Cl -8.54406123E-01 +2.17149192E+00 -1.61566604E+00 
C  +4.08769362E-01 +3.06513786E-01 +2.48858918E+00 
C  +1.72836304E+00 +1.08133028E+00 +2.23174524E+00 
H  +2.65410163E+00 +4.81489354E-01 +2.24679057E+00 
C  +1.32491978E+00 +1.53211506E+00 +8.63459558E-01 
H  +1.88206620E+00 +1.93393791E+00 +2.91435146E+00 
H  +1.85585954E+00 +2.24858625E+00 +2.14984108E-01 
H  -1.70112120E-01 +7.15846788E-01 +3.32540176E+00 
H  +5.59676268E-01 -7.70916982E-01 +2.64107459E+00 
C  +9.26862042E-01 -2.89003113E+00 -8.23168294E-01 
C  -5.77324686E-01 -3.02539390E+00 -6.12115056E-01 
N  +1.21003470E+00 -1.60595227E+00 -1.70640368E-01 
C  +8.07508901E-02 -8.26742473E-01 -7.88215697E-02 
N  -9.59712728E-01 -1.62956363E+00 -4.44716758E-01 
H  -1.09777988E+00 -3.47991862E+00 -1.46638228E+00 
H  +1.18491765E+00 -2.83312289E+00 -1.89600818E+00 
H  -8.15576980E-01 -3.60559991E+00 +2.98232170E-01 
H  +1.50537766E+00 -3.70453305E+00 -3.66735816E-01 
C  +2.54564581E+00 -1.10654066E+00 -2.48878522E-01 
C  +3.47115939E+00 -1.51495415E+00 +7.21223597E-01 
C  +2.92803735E+00 -2.85704543E-01 -1.32499018E+00 
C  +4.78949320E+00 -1.06177218E+00 +6.21796636E-01 
C  +4.25343157E+00 +1.52940420E-01 -1.37529517E+00 
C  +5.19423180E+00 -2.16048658E-01 -4.11091370E-01 
H  +5.51341249E+00 -1.37130754E+00 +1.38031661E+00 
H  +4.55748224E+00 +8.00061378E-01 -2.20253641E+00 
C  -2.32631910E+00 -1.21379388E+00 -3.65087081E-01 
C  -2.99613122E+00 -1.18342819E+00 +8.64458602E-01 
C  -2.95618529E+00 -8.22377968E-01 -1.56158044E+00 
C  -4.31872275E+00 -7.26033002E-01 +8.77140893E-01 
C  -4.27221962E+00 -3.78379491E-01 -1.49725963E+00 
C  -4.96301971E+00 -3.09021042E-01 -2.82280407E-01 
H  -4.83977269E+00 -6.62993020E-01 +1.83584854E+00 
H  -4.76249859E+00 -4.64795256E-02 -2.41580732E+00 
C  -2.19378711E+00 -8.26322257E-01 -2.85658740E+00 
H  -1.43893933E+00 -2.23075468E-02 -2.82045053E+00 
H  -1.68034122E+00 -1.78538389E+00 -3.02781076E+00 
H  -2.86789991E+00 -6.34425616E-01 -3.70189313E+00 
C  -2.34201476E+00 -1.56752616E+00 +2.16499297E+00 
H  -1.38202635E+00 -2.07732698E+00 +2.01681034E+00 
H  -2.13616513E+00 -6.53096452E-01 +2.74351400E+00 
H  -3.00973977E+00 -2.21672977E+00 +2.75030774E+00 
C  -6.35387705E+00 +2.66403925E-01 -2.28153763E-01 
H  -6.30136372E+00 +1.36425573E+00 -1.61003493E-01 
H  -6.92918957E+00 +1.30868768E-02 -1.13022709E+00 
H  -6.90386964E+00 -9.63128449E-02 +6.51199733E-01 
C  +1.94206570E+00 +1.26548977E-01 -2.37914087E+00 
H  +2.46297396E+00 +5.14912407E-01 -3.26410191E+00 
H  +1.30617650E+00 -7.16170937E-01 -2.69017252E+00 
H  +1.25021592E+00 +9.01874030E-01 -2.00522821E+00 
C  +3.04694996E+00 -2.38430932E+00 +1.87484396E+00 
H  +3.91222399E+00 -2.65243619E+00 +2.49559992E+00 
H  +2.31390080E+00 -1.85353624E+00 +2.50081295E+00 
H  +2.56532740E+00 -3.31345013E+00 +1.53601323E+00 
C  +6.60699324E+00 +3.04969236E-01 -4.81345595E-01 
H  +7.28320281E+00 -2.88428576E-01 +1.49359106E-01 
H  +6.98842684E+00 +2.84245624E-01 -1.51248556E+00 
H  +6.65420309E+00 +1.34903183E+00 -1.34456151E-01 
60
Ru-4_isom-7_M06-2X
C  -4.74775810E-01 -2.62490644E+00 -3.85436346E-01 
C  +8.55068741E-01 -2.32088009E+00 -1.10799539E+00 
N  -8.60711735E-01 -1.33790759E+00 +1.86681261E-01 
C  +9.12396755E-02 -3.22892983E-01 -1.90759925E-01 
N  +1.26563969E+00 -1.03974794E+00 -5.45598120E-01 
H  +6.90774422E-01 -2.22839536E+00 -2.19473654E+00 
H  -1.23135616E+00 -3.00775143E+00 -1.09068568E+00 
H  +1.62100250E+00 -3.08216846E+00 -9.10258102E-01 
H  -3.49959649E-01 -3.37781709E+00 +4.14732340E-01 
C  +2.57070259E+00 -8.32317617E-01 -4.57383892E-02 
C  +2.83052418E+00 -6.32995911E-01 +1.32501465E+00 
C  +3.64771495E+00 -8.67261931E-01 -9.60875651E-01 
C  +4.14743882E+00 -4.18732173E-01 +1.74422876E+00 
C  +4.94608650E+00 -6.69562558E-01 -4.91504700E-01 
C  +5.22057952E+00 -4.25490203E-01 +8.55962721E-01 
H  +4.33524873E+00 -2.64315746E-01 +2.81094233E+00 
H  +5.76883091E+00 -6.89551797E-01 -1.21215883E+00 
C  -2.23819301E+00 -1.06892408E+00 +4.47053511E-01 
C  -2.66960512E+00 -1.07006774E+00 +1.78849560E+00 
C  -3.16889534E+00 -8.45927357E-01 -5.83449004E-01 
C  -4.01423367E+00 -8.44027557E-01 +2.07978087E+00 
C  -4.50968637E+00 -6.27149340E-01 -2.48761834E-01 
C  -4.95189994E+00 -6.14558482E-01 +1.07067500E+00 
H  -4.33753187E+00 -8.48259933E-01 +3.12453385E+00 
H  -5.22420546E+00 -4.43969530E-01 -1.05610938E+00 
C  +3.39664956E+00 -1.10237350E+00 -2.42459612E+00 
H  +4.28097157E+00 -8.29854929E-01 -3.01652411E+00 
H  +3.16923747E+00 -2.16101413E+00 -2.63064081E+00 
H  +2.52915210E+00 -5.25794275E-01 -2.77767851E+00 
C  +1.72825482E+00 -6.72560164E-01 +2.34447711E+00 
H  +2.12812218E+00 -9.36341926E-01 +3.33328745E+00 
H  +1.22400884E+00 +3.03501226E-01 +2.42259978E+00 
H  +9.58937169E-01 -1.40036445E+00 +2.05663463E+00 
C  -2.76736580E+00 -7.79016547E-01 -2.02949232E+00 
H  -2.65387107E+00 +2.80536392E-01 -2.33060874E+00 
H  -1.82822638E+00 -1.29529688E+00 -2.25633990E+00 
H  -3.55554455E+00 -1.19050726E+00 -2.67552947E+00 
C  -1.68637163E+00 -1.30456772E+00 +2.90287983E+00 
H  -9.66715621E-01 -4.74930228E-01 +2.96378136E+00 
H  -2.20537829E+00 -1.38759796E+00 +3.86744695E+00 
H  -1.10173806E+00 -2.22014223E+00 +2.73334590E+00 
Ru -4.38970796E-01 +1.01059866E+00 -1.71781814E+00 
Cl +2.28453464E-01 -1.05741984E-01 -3.83535197E+00 
Cl -1.99610292E+00 +2.73468273E+00 -1.10699730E+00 
C  +1.24634684E+00 +2.06330811E+00 -1.36071129E+00 
C  +1.13358008E+00 +2.02452164E+00 +1.64123039E-01 
C  +7.13467430E-03 +1.00582095E+00 +2.94095814E-01 
H  +2.05957197E+00 +1.78329862E+00 +7.10949284E-01 
H  +2.12969361E+00 +1.54540433E+00 -1.76132612E+00 
H  +7.47821374E-01 +2.97836295E+00 +5.42133998E-01 
H  +1.18123208E+00 +3.07393587E+00 -1.78532620E+00 
H  -8.34835708E-01 +1.22274202E+00 +9.57966645E-01 
C  -6.39228252E+00 -3.22852353E-01 +1.40427599E+00 
H  -7.06269403E+00 -6.48494347E-01 +5.96658311E-01 
H  -6.69794001E+00 -8.26108471E-01 +2.33272051E+00 
H  -6.54516316E+00 +7.58827260E-01 +1.54547390E+00 
C  +6.62964853E+00 -1.65558938E-01 +1.32405896E+00 
H  +6.71238582E+00 -2.73290572E-01 +2.41468651E+00 
H  +7.34166722E+00 -8.60991671E-01 +8.55483676E-01 
H  +6.95033408E+00 +8.55939107E-01 +1.06452833E+00 
60
Ru-4_isom-8_M06-2X
Ru -2.94927654E-01 +9.29881457E-01 +7.77938622E-01 
Cl -1.52718685E+00 +2.77811414E+00 +1.85851180E+00 
Cl -1.03935520E+00 +1.86594044E+00 -1.60841483E+00 
C  +6.12597023E-01 +3.43460610E-01 +2.22592043E+00 
C  +1.81955967E+00 +1.24015627E+00 +2.25484816E+00 
H  +2.78869046E+00 +7.15019201E-01 +2.32175572E+00 
C  +1.50921531E+00 +1.86769152E+00 +8.84945143E-01 
H  +1.76002593E+00 +1.95754408E+00 +3.09119154E+00 
H  +1.30065893E+00 +2.94283611E+00 +9.09178718E-01 
H  +2.24635667E+00 +1.63180176E+00 +1.14159138E-01 
H  +4.81978957E-01 -4.83196449E-01 +2.95227588E+00 
C  +9.21186274E-01 -2.82698401E+00 -1.03157509E+00 
C  -5.88962006E-01 -2.94379718E+00 -8.71801946E-01 
N  +1.19741599E+00 -1.59390008E+00 -2.88616309E-01 
C  +8.69422089E-02 -8.02953508E-01 -1.52232734E-01 
N  -9.56025869E-01 -1.55383650E+00 -6.12153964E-01 
H  -1.09480675E+00 -3.33578738E+00 -1.76391070E+00 
H  +1.21443478E+00 -2.70638988E+00 -2.08958848E+00 
H  -8.63133687E-01 -3.57313603E+00 -5.05544340E-03 
H  +1.47238832E+00 -3.67899810E+00 -6.10083796E-01 
C  +2.53987533E+00 -1.10667562E+00 -2.81391975E-01 
C  +3.40323728E+00 -1.53264500E+00 +7.35010774E-01 
C  +2.98601150E+00 -2.79320677E-01 -1.32576849E+00 
C  +4.73217272E+00 -1.10191613E+00 +7.07603159E-01 
C  +4.32315022E+00 +1.23923212E-01 -1.31476973E+00 
C  +5.20667875E+00 -2.69343124E-01 -3.06855221E-01 
H  +5.40958795E+00 -1.42255920E+00 +1.50349592E+00 
H  +4.67939671E+00 +7.75783418E-01 -2.11698680E+00 
C  -2.33012938E+00 -1.19198551E+00 -4.48488454E-01 
C  -2.91238849E+00 -1.15024694E+00 +8.24552340E-01 
C  -3.07509135E+00 -9.03558788E-01 -1.60751501E+00 
C  -4.24933911E+00 -7.43296184E-01 +9.23066473E-01 
C  -4.40411759E+00 -5.24040768E-01 -1.45877549E+00 
C  -5.00211748E+00 -4.14476508E-01 -1.98282504E-01 
H  -4.70254006E+00 -6.75345123E-01 +1.91555667E+00 
H  -4.98183430E+00 -2.71354282E-01 -2.35148400E+00 
C  -2.42654246E+00 -9.51969325E-01 -2.96237704E+00 
H  -1.61704611E+00 -2.05173838E-01 -2.98655285E+00 
H  -2.00359730E+00 -1.94530136E+00 -3.18184353E+00 
H  -3.15653014E+00 -7.10344188E-01 -3.74619647E+00 
C  -2.17597556E+00 -1.53026130E+00 +2.08611672E+00 
H  -1.20561807E+00 -1.99923886E+00 +1.87875692E+00 
H  -1.97882250E+00 -6.34271820E-01 +2.69398061E+00 
H  -2.78924577E+00 -2.22553715E+00 +2.67888910E+00 
C  -6.41479841E+00 +9.09770117E-02 -6.43021542E-02 
H  -6.42755428E+00 +1.19133108E+00 -1.02807311E-01 
H  -7.05224689E+00 -2.78682702E-01 -8.80510759E-01 
H  -6.86037933E+00 -2.14935694E-01 +8.92293221E-01 
C  +2.03760656E+00 +2.06511138E-01 -2.38354921E+00 
H  +2.58534540E+00 +6.72209501E-01 -3.21299934E+00 
H  +1.41930095E+00 -6.09373484E-01 -2.78700024E+00 
H  +1.32292958E+00 +9.39797500E-01 -1.96814328E+00 
C  +2.89563840E+00 -2.40748445E+00 +1.84945651E+00 
H  +3.70403104E+00 -2.65307413E+00 +2.55088221E+00 
H  +2.09311145E+00 -1.89396987E+00 +2.39962480E+00 
H  +2.47202324E+00 -3.34899002E+00 +1.46775050E+00 
C  +6.63132089E+00 +2.23144213E-01 -3.03904831E-01 
H  +7.26823725E+00 -3.99488810E-01 +3.39459548E-01 
H  +7.05566985E+00 +2.20464701E-01 -1.31823096E+00 
H  +6.68293699E+00 +1.25685261E+00 +7.20483025E-02 
60
Ru-4_isom-9_M06-2X
C  -6.92782927E-01 -3.17959410E+00 -1.77699639E-01 
C  +8.28057818E-01 -3.17818880E+00 -3.20625621E-02 
N  -1.01359324E+00 -1.77093638E+00 +9.34848549E-02 
C  +5.31421517E-02 -9.45871196E-01 +5.10564914E-02 
N  +1.13265069E+00 -1.74166579E+00 -1.15763998E-01 
H  +1.33946919E+00 -3.74268800E+00 -8.23273189E-01 
H  -1.01383265E+00 -3.44773878E+00 -1.19866868E+00 
H  +1.15497875E+00 -3.57200517E+00 +9.46243738E-01 
H  -1.19962743E+00 -3.84736772E+00 +5.32734218E-01 
C  +2.47997575E+00 -1.29548992E+00 +4.83647183E-02 
C  +2.92847557E+00 -9.39383865E-01 +1.32851856E+00 
C  +3.32844677E+00 -1.26229394E+00 -1.06607421E+00 
C  +4.25060976E+00 -5.11285628E-01 +1.46651945E+00 
C  +4.64133581E+00 -8.23593681E-01 -8.80806099E-01 
C  +5.11498630E+00 -4.34243208E-01 +3.73478727E-01 
H  +4.60646985E+00 -2.14962559E-01 +2.45693118E+00 
H  +5.30673362E+00 -7.74647755E-01 -1.74685109E+00 
C  -2.37425623E+00 -1.34319089E+00 +1.70571846E-01 
C  -3.03671014E+00 -1.44102190E+00 +1.40337845E+00 
C  -3.02145806E+00 -8.74198888E-01 -9.79505990E-01 
C  -4.37039498E+00 -1.04050785E+00 +1.46895649E+00 
C  -4.35807884E+00 -4.77791339E-01 -8.64702873E-01 
C  -5.04308777E+00 -5.47348724E-01 +3.48054504E-01 
H  -4.89121369E+00 -1.09651950E+00 +2.42848826E+00 
H  -4.87257082E+00 -1.01724706E-01 -1.75299055E+00 
C  +2.82372617E+00 -1.66642718E+00 -2.42368350E+00 
H  +3.59335033E+00 -1.49430023E+00 -3.18799253E+00 
H  +2.55136505E+00 -2.73412678E+00 -2.45009762E+00 
H  +1.93307973E+00 -1.07133957E+00 -2.67532701E+00 
C  +1.99885682E+00 -9.80079182E-01 +2.50959008E+00 
H  +1.45783616E+00 -1.93780942E+00 +2.56516250E+00 
H  +2.55689291E+00 -8.42847316E-01 +3.44550458E+00 
H  +1.23498916E+00 -1.88378516E-01 +2.43407694E+00 
C  -2.29500880E+00 -7.85898994E-01 -2.29352858E+00 
H  -1.52152943E+00 -1.12317460E-03 -2.27775686E+00 
H  -1.76976250E+00 -1.72481349E+00 -2.52578672E+00 
H  -2.99763275E+00 -5.70615937E-01 -3.10962772E+00 
C  -2.30117812E+00 -1.91900769E+00 +2.62427205E+00 
H  -1.49641506E+00 -1.20377865E+00 +2.85574898E+00 
H  -2.97908855E+00 -1.98117163E+00 +3.48584010E+00 
H  -1.84819453E+00 -2.91045574E+00 +2.46740442E+00 
Ru +1.20006258E-02 +1.49001986E+00 +5.64513966E-02 
Cl +7.46237334E-01 +1.18918957E+00 -2.30000712E+00 
Cl -9.03165739E-01 +1.29569503E+00 +2.34039265E+00 
C  +1.13537198E-01 +3.28100921E+00 -1.43565100E-04 
C  +1.52773667E+00 +3.55709500E+00 +4.28727678E-01 
C  +1.86914778E+00 +2.07340055E+00 +6.45238453E-01 
H  +2.11993782E+00 +4.04634610E+00 -3.64825837E-01 
H  +2.65336201E+00 +1.68655674E+00 -1.74950338E-02 
H  -5.87135853E-01 +4.08075641E+00 -3.00363789E-01 
H  +1.59227745E+00 +4.18297440E+00 +1.33665991E+00 
H  +2.07321130E+00 +1.81933870E+00 +1.69308075E+00 
C  -6.46838434E+00 -6.98103665E-02 +4.62025547E-01 
H  -6.95320958E+00 -2.11295479E-02 -5.22795522E-01 
H  -7.06192187E+00 -7.33051642E-01 +1.10795435E+00 
H  -6.50359205E+00 +9.38666054E-01 +9.03236427E-01 
C  +6.51556719E+00 +9.82173391E-02 +5.37914154E-01 
H  +6.92418793E+00 -1.50333715E-01 +1.52776399E+00 
H  +7.19117784E+00 -3.07596846E-01 -2.28262903E-01 
H  +6.52341642E+00 +1.19559097E+00 +4.42266762E-01 
60
Ru-4_isom-10_M06-2X
C  -6.28345356E-01 -2.84892168E+00 +2.44660973E-01 
C  +8.91455848E-01 -2.80227713E+00 +1.67849422E-01 
N  -9.83419451E-01 -1.46380195E+00 -4.94815634E-02 
C  +5.80553151E-02 -5.89019617E-01 +9.64568122E-02 
N  +1.16478692E+00 -1.37136538E+00 +3.28951893E-01 
H  +1.27011800E+00 -3.14950555E+00 -8.09543901E-01 
H  -1.08158620E+00 -3.53439666E+00 -4.85024229E-01 
H  +1.38817455E+00 -3.38552598E+00 +9.56582926E-01 
H  -9.87872320E-01 -3.12599781E+00 +1.25180506E+00 
C  +2.53457518E+00 -9.86292318E-01 +2.02793005E-01 
C  +3.35770941E+00 -1.01670903E+00 +1.33363896E+00 
C  +3.05994433E+00 -7.18180219E-01 -1.07744982E+00 
C  +4.71904094E+00 -7.26224596E-01 +1.17547182E+00 
C  +4.41873655E+00 -4.32326289E-01 -1.18500396E+00 
C  +5.26297593E+00 -4.20671571E-01 -6.83040818E-02 
H  +5.36574290E+00 -7.38304497E-01 +2.05737416E+00 
H  +4.83155769E+00 -2.10400264E-01 -2.17293730E+00 
C  -2.36990561E+00 -1.10912689E+00 -2.88936195E-02 
C  -2.99149187E+00 -7.99710229E-01 +1.18751066E+00 
C  -3.08367562E+00 -1.15770185E+00 -1.23561857E+00 
C  -4.35786368E+00 -5.12989840E-01 +1.16901742E+00 
C  -4.44376129E+00 -8.54081632E-01 -1.20537542E+00 
C  -5.09292279E+00 -5.19886894E-01 -1.42860254E-02 
H  -4.84863918E+00 -2.38550000E-01 +2.10633608E+00 
H  -5.00776116E+00 -8.66740812E-01 -2.14157303E+00 
C  +2.16956705E+00 -6.92742774E-01 -2.28662444E+00 
H  +2.76635367E+00 -7.13965561E-01 -3.20782662E+00 
H  +1.47102806E+00 -1.54265642E+00 -2.30236536E+00 
H  +1.53787013E+00 +2.11704750E-01 -2.29398900E+00 
C  +2.82045969E+00 -1.31536512E+00 +2.70945508E+00 
H  +3.52439293E+00 -1.94577412E+00 +3.27122276E+00 
H  +2.68006005E+00 -3.77648448E-01 +3.26971132E+00 
H  +1.84305160E+00 -1.81053281E+00 +2.67024703E+00 
C  -2.38401248E+00 -1.49802178E+00 -2.52225144E+00 
H  -1.65150893E+00 -7.10164125E-01 -2.76195580E+00 
H  -1.84245243E+00 -2.45463319E+00 -2.44719257E+00 
H  -3.10652752E+00 -1.57369148E+00 -3.34584454E+00 
C  -2.21938466E+00 -6.87024750E-01 +2.47376133E+00 
H  -1.91229426E+00 +3.63676713E-01 +2.60162204E+00 
H  -2.84582756E+00 -9.78852213E-01 +3.32816590E+00 
H  -1.30595494E+00 -1.29773201E+00 +2.47714662E+00 
Ru -1.94874351E-01 +1.32666655E+00 +5.65574879E-02 
Cl -6.03224166E-01 +1.59955625E+00 -2.43252231E+00 
Cl -2.32146278E+00 +2.44524326E+00 +8.86558750E-01 
C  +1.62338581E+00 +1.94056262E+00 +9.09735971E-02 
C  +1.92219956E+00 +2.04349987E+00 +1.54916767E+00 
C  +5.82131853E-01 +1.42232819E+00 +1.99836194E+00 
H  +2.82031506E+00 +1.49214628E+00 +1.88254630E+00 
H  +7.05701896E-01 +4.56113248E-01 +2.50167777E+00 
H  +2.36587903E+00 +1.88902273E+00 -7.11583552E-01 
H  +2.04110584E+00 +3.08533618E+00 +1.89072831E+00 
H  -5.24501409E-02 +2.08121020E+00 +2.60093893E+00 
C  -6.54489716E+00 -1.18108114E-01 -1.65162642E-02 
H  -7.08845058E+00 -5.79039041E-01 -8.53409057E-01 
H  -7.04168735E+00 -4.03867048E-01 +9.21584410E-01 
H  -6.63285273E+00 +9.74833721E-01 -1.19923624E-01 
C  +6.72230720E+00 -7.62029967E-02 -2.20654408E-01 
H  +7.28468801E+00 -3.07497091E-01 +6.94236505E-01 
H  +7.17695664E+00 -6.30131228E-01 -1.05520927E+00 
H  +6.84817892E+00 +9.96958460E-01 -4.31753148E-01 
60
Ru-4_isom-11_M06-2X
Ru +1.08011758E-01 +1.23556401E+00 -1.55082144E-01 
Cl -8.24644306E-01 +1.35963691E+00 +2.11682376E+00 
Cl +9.24678313E-01 +1.13216262E+00 -2.46088712E+00 
C  -1.06751298E+00 +4.08813456E+00 +4.34846394E-02 
H  -1.87991285E+00 +3.56288665E+00 +5.44686518E-01 
C  +1.28584935E-02 -9.52355443E-01 -5.15107412E-02 
H  -1.38307686E+00 +4.88653666E+00 -6.29462681E-01 
N  -1.06715534E+00 -1.74582827E+00 +1.41091939E-01 
C  -7.65595628E-01 -3.17805692E+00 +2.00914376E-02 
C  +7.53229608E-01 -3.18275759E+00 +1.68799871E-01 
N  +1.07802064E+00 -1.78539301E+00 -1.38866087E-01 
H  +1.06907452E+00 -3.42358107E+00 +1.19927460E+00 
H  -1.28172562E+00 -3.76246494E+00 +7.93391438E-01 
C  +2.43937935E+00 -1.35179532E+00 -1.50700953E-01 
C  +3.01416364E+00 -8.32357799E-01 +1.01704084E+00 
C  +3.17607699E+00 -1.49453797E+00 -1.33664103E+00 
C  +4.35361765E+00 -4.32256203E-01 +9.66221071E-01 
C  +4.50893915E+00 -1.08701637E+00 -1.33782363E+00 
C  +5.11061636E+00 -5.44394738E-01 -1.99102337E-01 
H  +4.81177050E+00 -1.69585623E-02 +1.86770548E+00 
H  +5.08730184E+00 -1.17801016E+00 -2.26097559E+00 
C  -2.42445545E+00 -1.30350720E+00 +8.09505212E-02 
C  -2.97750154E+00 -9.31132483E-01 -1.15204584E+00 
C  -3.18353743E+00 -1.30528831E+00 +1.26009718E+00 
C  -4.31656247E+00 -5.30543661E-01 -1.17596233E+00 
C  -4.51699248E+00 -9.02474986E-01 +1.18638796E+00 
C  -5.09650538E+00 -5.02307105E-01 -1.97954695E-02 
H  -4.75727758E+00 -2.29032075E-01 -2.12992175E+00 
H  -5.11333066E+00 -8.84770989E-01 +2.10239735E+00 
C  +2.51940487E+00 -2.02803759E+00 -2.57945429E+00 
H  +3.24149947E+00 -2.08474845E+00 -3.40471174E+00 
H  +2.09833265E+00 -3.03315811E+00 -2.42023486E+00 
H  +1.70006433E+00 -1.35124639E+00 -2.86823062E+00 
C  +2.21674990E+00 -6.86032745E-01 +2.28505067E+00 
H  +1.55694359E+00 -1.54959301E+00 +2.45425852E+00 
H  +2.88590527E+00 -5.81169950E-01 +3.14955763E+00 
H  +1.55622028E+00 +1.95106566E-01 +2.24594028E+00 
C  -2.55588946E+00 -1.69129324E+00 +2.57097300E+00 
H  -3.29009678E+00 -1.62565448E+00 +3.38488361E+00 
H  -2.16086035E+00 -2.71931641E+00 +2.54813026E+00 
H  -1.72203278E+00 -1.00523323E+00 +2.78599967E+00 
C  -2.15181172E+00 -9.39871166E-01 -2.40922513E+00 
H  -1.44476842E+00 -9.49682229E-02 -2.42629625E+00 
H  -1.53914660E+00 -1.85078942E+00 -2.48639379E+00 
H  -2.79716667E+00 -8.77325135E-01 -3.29554115E+00 
H  +1.25771172E+00 -3.87258873E+00 -5.21078838E-01 
H  -1.08746672E+00 -3.54546036E+00 -9.70330619E-01 
C  -6.52286618E+00 -1.64329955E-02 -6.17817704E-02 
H  -6.57342790E+00 +1.05498434E+00 +1.88349197E-01 
H  -6.95932572E+00 -1.45247921E-01 -1.06208845E+00 
H  -7.15044543E+00 -5.55152497E-01 +6.62517110E-01 
C  +6.53635639E+00 -5.75481609E-02 -2.45588588E-01 
H  +7.16136072E+00 -7.09006104E-01 -8.73231433E-01 
H  +6.58306797E+00 +9.56902113E-01 -6.71739659E-01 
H  +6.97755072E+00 -1.74081717E-02 +7.59939895E-01 
C  +1.96649297E-01 +4.29254890E+00 +8.38638732E-01 
C  +1.91574762E-01 +3.29704285E+00 -2.99150446E-01 
H  +2.04713172E-01 +3.90854171E+00 +1.85703187E+00 
H  +7.28740475E-01 +5.23449144E+00 +6.94464998E-01 
H  +6.87504924E-01 +3.67596337E+00 -1.19772471E+00 
60
Ru-4_isom-12_M06-2X
C  -6.04325791E-01 -2.95545911E+00 +3.36699281E-01 
C  +9.09702981E-01 -2.88541828E+00 +1.67750263E-01 
N  -9.84158432E-01 -1.58345102E+00 +2.52614829E-02 
C  +4.70494880E-02 -6.92244563E-01 +1.70912218E-01 
N  +1.17188523E+00 -1.45630258E+00 +3.61004855E-01 
H  +1.22544707E+00 -3.19411880E+00 -8.45057723E-01 
H  -1.08628123E+00 -3.67004014E+00 -3.44842123E-01 
H  +1.46002002E+00 -3.48925096E+00 +9.03075595E-01 
H  -8.92357964E-01 -3.20879153E+00 +1.37386113E+00 
C  +2.52173703E+00 -1.01834275E+00 +1.85745958E-01 
C  +3.40204600E+00 -1.05647727E+00 +1.27081737E+00 
C  +2.96383074E+00 -6.54482823E-01 -1.10311720E+00 
C  +4.73680855E+00 -6.83359415E-01 +1.05966305E+00 
C  +4.29756073E+00 -2.93641669E-01 -1.26437680E+00 
C  +5.19801459E+00 -2.90181647E-01 -1.91607721E-01 
H  +5.42800515E+00 -7.00295590E-01 +1.90717974E+00 
H  +4.64400460E+00 +5.68297040E-03 -2.25736888E+00 
C  -2.35680151E+00 -1.18398741E+00 -3.05134520E-03 
C  -2.99832631E+00 -7.32185335E-01 +1.15773122E+00 
C  -3.03121741E+00 -1.25702505E+00 -1.23617820E+00 
C  -4.33314821E+00 -3.22207499E-01 +1.05239146E+00 
C  -4.36041612E+00 -8.51852029E-01 -1.28730416E+00 
C  -5.02273756E+00 -3.65756785E-01 -1.54272868E-01 
H  -4.83163392E+00 +6.52169330E-02 +1.94455892E+00 
H  -4.88574544E+00 -8.84582193E-01 -2.24522919E+00 
C  +2.00521983E+00 -5.99234709E-01 -2.25758080E+00 
H  +2.54780943E+00 -5.24729469E-01 -3.20906911E+00 
H  +1.35342031E+00 -1.48519960E+00 -2.29562439E+00 
H  +1.33349710E+00 +2.70235147E-01 -2.16071262E+00 
C  +2.95871837E+00 -1.44554826E+00 +2.65760064E+00 
H  +3.71440705E+00 -2.08146965E+00 +3.14086188E+00 
H  +2.82515334E+00 -5.44707586E-01 +3.27684552E+00 
H  +1.99686460E+00 -1.97147792E+00 +2.64925220E+00 
C  -2.29967261E+00 -1.69821357E+00 -2.47286180E+00 
H  -1.53828406E+00 -9.40175723E-01 -2.71906471E+00 
H  -1.79218613E+00 -2.66450557E+00 -2.32795191E+00 
H  -2.99267474E+00 -1.79183894E+00 -3.31948307E+00 
C  -2.30937564E+00 -6.34151063E-01 +2.49488828E+00 
H  -2.13618430E+00 +4.26325808E-01 +2.73888513E+00 
H  -2.94327885E+00 -1.07263154E+00 +3.27959927E+00 
H  -1.33203292E+00 -1.13287693E+00 +2.50383549E+00 
Ru -3.58265924E-01 +1.18423785E+00 +3.18053852E-01 
Cl -9.52533505E-01 +1.55695502E+00 -2.12530385E+00 
Cl -1.86359867E+00 +3.00948787E+00 +1.18302162E+00 
C  +1.48664721E+00 +1.81049357E+00 +2.32066925E-01 
C  +1.77739832E+00 +1.96721624E+00 +1.69040571E+00 
C  +5.54348345E-01 +1.16702970E+00 +2.19333794E+00 
H  +2.75685784E+00 +1.55912750E+00 +2.00376775E+00 
H  +8.16324748E-01 +1.77954694E-01 +2.58592224E+00 
H  +1.73190923E+00 +3.01701602E+00 +2.02374188E+00 
H  +1.70890992E+00 +2.55035642E+00 -5.45204215E-01 
H  -6.63226250E-02 +1.71546585E+00 +2.90877974E+00 
C  -6.43440860E+00 +1.49652797E-01 -2.58467213E-01 
H  -7.03102686E+00 -4.53144516E-01 -9.58294099E-01 
H  -6.93468359E+00 +1.46291276E-01 +7.19629046E-01 
H  -6.43127517E+00 +1.18658131E+00 -6.28843314E-01 
C  +6.62845411E+00 +1.35645191E-01 -4.01851646E-01 
H  +7.23215153E+00 -3.41019892E-02 +5.00116689E-01 
H  +7.08991849E+00 -4.16834879E-01 -1.23417429E+00 
H  +6.68323217E+00 +1.20682420E+00 -6.49371110E-01 
60
Ru-4_isom-13_M06-2X
Ru -3.95929875E-01 +8.84337168E-01 +6.49120920E-01 
Cl -1.90261264E+00 +2.12265259E+00 +2.23046289E+00 
Cl -9.44586671E-01 +2.16824932E+00 -1.49799391E+00 
C  +5.22082164E-01 +1.77295159E-01 +2.28654933E+00 
C  +1.71173785E+00 +1.09718044E+00 +2.32442766E+00 
H  +2.69977742E+00 +6.02590476E-01 +2.35449941E+00 
C  +1.40198491E+00 +1.79067394E+00 +9.96059400E-01 
H  +1.66813429E+00 +1.79960083E+00 +3.17347129E+00 
H  +1.16164671E+00 +2.85711459E+00 +1.08353636E+00 
H  +2.12243672E+00 +1.62324087E+00 +1.90466451E-01 
H  +1.56476420E-03 -1.18979708E-01 +3.20440185E+00 
C  +9.64013364E-01 -2.84734638E+00 -9.70662057E-01 
C  -5.41622289E-01 -3.00698935E+00 -7.77863801E-01 
N  +1.21904661E+00 -1.57349539E+00 -2.93358553E-01 
C  +8.58893759E-02 -8.19052554E-01 -1.58194734E-01 
N  -9.41613540E-01 -1.62071156E+00 -5.75124781E-01 
H  -1.04767878E+00 -3.44703284E+00 -1.64829858E+00 
H  +1.23436940E+00 -2.77008893E+00 -2.03948024E+00 
H  -7.79090408E-01 -3.61291570E+00 +1.15708353E-01 
H  +1.54843219E+00 -3.66132584E+00 -5.20158513E-01 
C  +2.54891135E+00 -1.05808934E+00 -2.99010433E-01 
C  +3.42540400E+00 -1.44373476E+00 +7.23407561E-01 
C  +2.97046719E+00 -2.37438024E-01 -1.35879276E+00 
C  +4.74197770E+00 -9.76568975E-01 +6.80931158E-01 
C  +4.29452137E+00 +2.05591439E-01 -1.35975322E+00 
C  +5.19084884E+00 -1.47491565E-01 -3.47707563E-01 
H  +5.42981513E+00 -1.26318533E+00 +1.48089963E+00 
H  +4.63114640E+00 +8.52033382E-01 -2.17478408E+00 
C  -2.31035378E+00 -1.22660038E+00 -4.51208538E-01 
C  -2.94820175E+00 -1.22553761E+00 +7.96269945E-01 
C  -2.97682350E+00 -8.16341428E-01 -1.62177059E+00 
C  -4.27061131E+00 -7.67774071E-01 +8.54493629E-01 
C  -4.29420710E+00 -3.85737235E-01 -1.51477659E+00 
C  -4.95081030E+00 -3.37983706E-01 -2.79193602E-01 
H  -4.76340126E+00 -7.22685685E-01 +1.82897246E+00 
H  -4.81257333E+00 -4.30104434E-02 -2.41384630E+00 
C  -2.24676186E+00 -7.84685100E-01 -2.93527116E+00 
H  -1.48018653E+00 +6.46753710E-03 -2.89230672E+00 
H  -1.74825520E+00 -1.74242976E+00 -3.15093128E+00 
H  -2.93898688E+00 -5.57681571E-01 -3.75690235E+00 
C  -2.27243122E+00 -1.66482046E+00 +2.06944874E+00 
H  -2.86626237E+00 -2.45021669E+00 +2.56152838E+00 
H  -1.25240299E+00 -2.03191167E+00 +1.90087193E+00 
H  -2.19694409E+00 -8.01219344E-01 +2.74878549E+00 
C  -6.34395688E+00 +2.25664825E-01 -1.77169934E-01 
H  -6.30020238E+00 +1.32305025E+00 -9.77622542E-02 
H  -6.94339510E+00 -2.22865472E-02 -1.06489160E+00 
H  -6.86449525E+00 -1.52538315E-01 +7.13365223E-01 
C  +2.00798771E+00 +1.96966800E-01 -2.42859169E+00 
H  +2.54639222E+00 +6.25048371E-01 -3.28417104E+00 
H  +1.39082038E+00 -6.40613461E-01 -2.78646725E+00 
H  +1.30109924E+00 +9.52736953E-01 -2.04342721E+00 
C  +2.94024400E+00 -2.30554601E+00 +1.85667741E+00 
H  +2.59539528E+00 -3.28867222E+00 +1.49953763E+00 
H  +3.74018471E+00 -2.46968806E+00 +2.59103884E+00 
H  +2.08122492E+00 -1.81847672E+00 +2.34789027E+00 
C  +6.60134170E+00 +3.84425736E-01 -3.55391920E-01 
H  +7.26132517E+00 -2.24790472E-01 +2.77480693E-01 
H  +7.01583021E+00 +4.00454206E-01 -1.37366718E+00 
H  +6.62874401E+00 +1.41641834E+00 +2.80275149E-02 
60
Ru-4_isom-14_M06-2X
Ru -3.27294221E-02 +1.26418527E+00 -9.09946321E-02 
Cl -1.06316801E+00 +1.34760647E+00 +2.19394967E+00 
Cl +7.24844818E-01 +1.13930151E+00 -2.46304533E+00 
C  -1.17015336E+00 +2.82977614E+00 -5.76373150E-01 
H  -2.08075020E+00 +2.92443875E+00 +1.63152187E-02 
C  -1.53652898E-02 -7.64955619E-01 -7.57020610E-02 
H  -1.26499777E+00 +3.01724126E+00 -1.64647905E+00 
N  -1.09668496E+00 -1.57727823E+00 +3.13887711E-02 
C  -7.61910117E-01 -2.97855520E+00 -2.33100586E-01 
C  +7.40254825E-01 -2.97708626E+00 +1.96805429E-02 
N  +1.06999073E+00 -1.56768950E+00 -2.09204654E-01 
H  +9.83502531E-01 -3.25023943E+00 +1.06270076E+00 
H  -1.31954574E+00 -3.65180538E+00 +4.30782278E-01 
C  +2.43150712E+00 -1.13948769E+00 -1.10233887E-01 
C  +2.93093373E+00 -6.59287635E-01 +1.10839917E+00 
C  +3.24990192E+00 -1.27473727E+00 -1.24401890E+00 
C  +4.27713279E+00 -2.81339111E-01 +1.15679137E+00 
C  +4.58494514E+00 -8.88763263E-01 -1.14341353E+00 
C  +5.11215973E+00 -3.78571736E-01 +4.63858234E-02 
H  +4.67376442E+00 +1.13093258E-01 +2.09590564E+00 
H  +5.22622646E+00 -9.74825091E-01 -2.02462582E+00 
C  -2.46385547E+00 -1.16025779E+00 +6.86849860E-02 
C  -3.09005984E+00 -6.74552634E-01 -1.08552689E+00 
C  -3.16149631E+00 -1.31075592E+00 +1.28043720E+00 
C  -4.43736153E+00 -3.02675671E-01 -9.91160249E-01 
C  -4.50096471E+00 -9.35009470E-01 +1.32199484E+00 
C  -5.15219456E+00 -4.16529599E-01 +1.97992619E-01 
H  -4.93510041E+00 +8.76314150E-02 -1.88292701E+00 
H  -5.04630082E+00 -1.03023177E+00 +2.26466564E+00 
C  +2.68688027E+00 -1.79631746E+00 -2.53758518E+00 
H  +3.45031537E+00 -1.77108093E+00 -3.32656182E+00 
H  +2.33568598E+00 -2.83639067E+00 -2.43945684E+00 
H  +1.83536283E+00 -1.16941426E+00 -2.84269676E+00 
C  +2.06302809E+00 -4.99628011E-01 +2.32551086E+00 
H  +1.23931762E+00 -1.22688500E+00 +2.35345014E+00 
H  +2.66325368E+00 -6.07853082E-01 +3.23951991E+00 
H  +1.59518597E+00 +4.98678979E-01 +2.32044059E+00 
C  -2.45804027E+00 -1.82271061E+00 +2.50653800E+00 
H  -3.15278610E+00 -1.87735795E+00 +3.35500643E+00 
H  -2.03164029E+00 -2.82578373E+00 +2.34714601E+00 
H  -1.63936802E+00 -1.13209475E+00 +2.76094673E+00 
C  -2.35702951E+00 -5.26927959E-01 -2.38963883E+00 
H  -1.85048561E+00 +4.48870495E-01 -2.44600805E+00 
H  -1.55771994E+00 -1.27167185E+00 -2.50420030E+00 
H  -3.05500399E+00 -6.17605462E-01 -3.23351354E+00 
H  +1.29967865E+00 -3.63341921E+00 -6.58943799E-01 
H  -1.00339638E+00 -3.23061433E+00 -1.28140382E+00 
C  -6.58948388E+00 +2.81377506E-02 +2.89287169E-01 
H  -6.66596444E+00 +9.76083328E-01 +8.44362247E-01 
H  -7.02212328E+00 +1.86877563E-01 -7.07954733E-01 
H  -7.20446394E+00 -7.14061854E-01 +8.19420654E-01 
C  +6.54341080E+00 +8.98718237E-02 +1.10606267E-01 
H  +7.19908155E+00 -5.38959924E-01 -5.08954673E-01 
H  +6.62711492E+00 +1.12340297E+00 -2.60778839E-01 
H  +6.92222055E+00 +7.59131685E-02 +1.14201378E+00 
C  +7.34228934E-02 +3.44357799E+00 +9.68665327E-02 
C  +1.39894795E+00 +2.41134650E+00 +2.34110011E-01 
H  -1.66407662E-01 +3.83600076E+00 +1.08352584E+00 
H  +5.30307128E-01 +4.16050565E+00 -5.89404257E-01 
H  +2.01517333E+00 +2.57727025E+00 -6.78318505E-01 
60
Ru-4_isom-15_M06-2X
Ru -2.90116426E-02 +1.27958539E+00 -1.06832061E-01 
Cl -9.58324646E-01 +1.29941336E+00 +2.19971233E+00 
Cl +5.99164882E-01 +1.24992812E+00 -2.55299219E+00 
C  -1.12895063E+00 +2.90217210E+00 -4.75442372E-01 
H  -1.84930719E+00 +3.15236805E+00 +3.02829174E-01 
C  -1.66720111E-02 -7.83095371E-01 -6.37705054E-02 
H  -1.47998019E+00 +2.98337703E+00 -1.50552764E+00 
N  -1.09643456E+00 -1.59570425E+00 -3.10371145E-02 
C  -7.43679625E-01 -3.00319771E+00 -2.44076805E-01 
C  +7.46281624E-01 -2.99398777E+00 +8.20756571E-02 
N  +1.07569915E+00 -1.57798969E+00 -1.07704853E-01 
H  +9.45325104E-01 -3.28774030E+00 +1.12803468E+00 
H  -1.33290511E+00 -3.66099764E+00 +4.07354217E-01 
C  +2.43519976E+00 -1.13712450E+00 -4.05544678E-02 
C  +2.95947766E+00 -6.88853664E-01 +1.17838276E+00 
C  +3.21354873E+00 -1.20289128E+00 -1.20492368E+00 
C  +4.29546732E+00 -2.81932491E-01 +1.20386963E+00 
C  +4.54130433E+00 -7.83124756E-01 -1.13041561E+00 
C  +5.09394374E+00 -3.09728430E-01 +6.15035691E-02 
H  +4.71362785E+00 +8.53643828E-02 +2.14460826E+00 
H  +5.15419301E+00 -8.11639112E-01 -2.03505787E+00 
C  -2.46698014E+00 -1.19150914E+00 +2.79401922E-02 
C  -3.11395841E+00 -7.21230870E-01 -1.12030577E+00 
C  -3.14354833E+00 -1.33859047E+00 +1.25117817E+00 
C  -4.46268067E+00 -3.61887895E-01 -1.01113107E+00 
C  -4.48601372E+00 -9.72785770E-01 +1.30893560E+00 
C  -5.15858601E+00 -4.71420441E-01 +1.90357617E-01 
H  -4.97689765E+00 +1.61415505E-02 -1.89867946E+00 
H  -5.01676192E+00 -1.06506407E+00 +2.26015622E+00 
C  +2.61621666E+00 -1.67487863E+00 -2.50176443E+00 
H  +3.37432257E+00 -1.67809104E+00 -3.29615774E+00 
H  +2.20697058E+00 -2.69432134E+00 -2.41623839E+00 
H  +1.79787654E+00 -9.97519995E-01 -2.79343324E+00 
C  +2.10779931E+00 -6.04178240E-01 +2.41387030E+00 
H  +1.42720226E+00 -1.46372958E+00 +2.50517780E+00 
H  +2.73644833E+00 -5.58021917E-01 +3.31323069E+00 
H  +1.46618695E+00 +2.91192678E-01 +2.38556851E+00 
C  -2.42029579E+00 -1.84009091E+00 +2.47036735E+00 
H  -3.09773849E+00 -1.87192408E+00 +3.33376468E+00 
H  -2.01320166E+00 -2.85260717E+00 +2.31875480E+00 
H  -1.58707396E+00 -1.15778330E+00 +2.69902098E+00 
C  -2.39012297E+00 -5.78165551E-01 -2.42926708E+00 
H  -1.81677524E+00 +3.61710856E-01 -2.46908584E+00 
H  -1.64974747E+00 -1.37644146E+00 -2.57954048E+00 
H  -3.10170997E+00 -5.90886019E-01 -3.26599103E+00 
H  +1.34356758E+00 -3.63016698E+00 -5.83335911E-01 
H  -9.35195136E-01 -3.28001772E+00 -1.29567952E+00 
C  -6.59793033E+00 -3.72403249E-02 +2.98495447E-01 
H  -6.67069784E+00 +9.33104472E-01 +8.14000949E-01 
H  -7.05664592E+00 +7.47490873E-02 -6.93438135E-01 
H  -7.19163569E+00 -7.61742488E-01 +8.75033517E-01 
C  +6.51075291E+00 +2.02402415E-01 +9.99098747E-02 
H  +7.14868395E+00 -3.27400149E-01 -6.21837649E-01 
H  +6.53582352E+00 +1.27335029E+00 -1.55924636E-01 
H  +6.95022539E+00 +8.93720077E-02 +1.10097208E+00 
C  +3.00890000E-01 +3.43299343E+00 -2.75231734E-01 
C  +1.38113806E+00 +2.36534963E+00 +4.61507612E-01 
H  +2.93050215E-01 +4.17693686E+00 +5.25428776E-01 
H  +7.37822151E-01 +3.76463868E+00 -1.21513967E+00 
H  +1.29385278E+00 +2.56845212E+00 +1.55847549E+00 
60
Ru-4_isom-16_M06-2X
Ru -8.53065400E-04 +1.22456345E+00 -1.75388997E-01 
Cl -9.15537555E-01 +1.36647132E+00 +2.02780954E+00 
Cl +1.05188542E+00 +1.16012323E+00 -2.30603728E+00 
C  -1.12453915E+00 +4.20833912E+00 +2.09957026E-01 
H  -1.90444527E+00 +3.74938890E+00 +8.16860912E-01 
C  +1.27637814E-02 -9.00535641E-01 -4.49836687E-02 
H  -1.45530589E+00 +5.05897364E+00 -3.89114672E-01 
N  -1.05928223E+00 -1.71049884E+00 +1.80519256E-01 
C  -7.50197892E-01 -3.13833101E+00 +4.86855230E-02 
C  +7.67046400E-01 -3.13040882E+00 +1.87012269E-01 
N  +1.08030013E+00 -1.73777787E+00 -1.50108582E-01 
H  +1.09015142E+00 -3.34670860E+00 +1.22127623E+00 
H  -1.25644405E+00 -3.73425515E+00 +8.19925207E-01 
C  +2.44759813E+00 -1.32520772E+00 -1.66458293E-01 
C  +3.03393100E+00 -7.93254518E-01 +9.88954870E-01 
C  +3.18841458E+00 -1.52364751E+00 -1.34234004E+00 
C  +4.38707656E+00 -4.40685964E-01 +9.36428926E-01 
C  +4.53395573E+00 -1.16209866E+00 -1.34678223E+00 
C  +5.14805020E+00 -6.10814685E-01 -2.18457565E-01 
H  +4.85324988E+00 -1.61043387E-02 +1.82957894E+00 
H  +5.11420981E+00 -1.29773290E+00 -2.26347886E+00 
C  -2.42200479E+00 -1.29152732E+00 +9.41800435E-02 
C  -2.96170810E+00 -9.19148954E-01 -1.14479457E+00 
C  -3.20744049E+00 -1.32366376E+00 +1.25700193E+00 
C  -4.30959071E+00 -5.48635203E-01 -1.19072476E+00 
C  -4.54733445E+00 -9.50524418E-01 +1.16200679E+00 
C  -5.11285827E+00 -5.50094663E-01 -5.13559725E-02 
H  -4.73830206E+00 -2.47325599E-01 -2.15026731E+00 
H  -5.16189187E+00 -9.56975169E-01 +2.06621144E+00 
C  +2.52167474E+00 -2.06575275E+00 -2.57668624E+00 
H  +3.23968360E+00 -2.13867958E+00 -3.40435972E+00 
H  +2.09213323E+00 -3.06549579E+00 -2.40591388E+00 
H  +1.70519202E+00 -1.38836296E+00 -2.86981074E+00 
C  +2.23554279E+00 -5.73674084E-01 +2.24447593E+00 
H  +1.50899364E+00 -1.38085956E+00 +2.41690210E+00 
H  +2.89938288E+00 -5.02476900E-01 +3.11673740E+00 
H  +1.64375813E+00 +3.52026277E-01 +2.17092855E+00 
C  -2.59855145E+00 -1.71143508E+00 +2.57646474E+00 
H  -3.34304882E+00 -1.64222866E+00 +3.38076584E+00 
H  -2.20842137E+00 -2.74145829E+00 +2.55969355E+00 
H  -1.76264084E+00 -1.03236711E+00 +2.80244172E+00 
C  -2.11998016E+00 -8.91954486E-01 -2.39151058E+00 
H  -1.50554767E+00 +2.11966407E-02 -2.42755066E+00 
H  -1.41319336E+00 -1.73376643E+00 -2.42755892E+00 
H  -2.75589733E+00 -9.26527847E-01 -3.28647117E+00 
H  +1.27253070E+00 -3.83254900E+00 -4.89778180E-01 
H  -1.07402779E+00 -3.50172149E+00 -9.43475046E-01 
C  -6.54945276E+00 -9.80746677E-02 -1.15158480E-01 
H  -6.63776101E+00 +9.54462524E-01 +1.96894596E-01 
H  -6.94758017E+00 -1.77014542E-01 -1.13628309E+00 
H  -7.18696869E+00 -6.95397237E-01 +5.52604130E-01 
C  +6.59205746E+00 -1.81113987E-01 -2.67919168E-01 
H  +7.20820818E+00 -9.11022330E-01 -8.13098270E-01 
H  +6.69040621E+00 +7.86113308E-01 -7.85220714E-01 
H  +7.00788417E+00 -6.33168485E-02 +7.42195486E-01 
C  +2.57589901E-01 +4.27692751E+00 +8.09330734E-01 
C  -2.25076387E-02 +3.31336564E+00 -3.29638974E-01 
H  +3.83231562E-01 +3.86534553E+00 +1.81025669E+00 
H  +8.48264541E-01 +5.17251823E+00 +6.07699143E-01 
H  +3.75248067E-01 +3.68919162E+00 -1.28037288E+00 
54
Ru-5_M06-2X
Ru +3.80511776E-01 -1.32294636E+00 +5.17424796E-01 
Cl -1.02758696E+00 -3.32997049E+00 +8.24019348E-01 
C  +1.84353402E+00 -1.74850015E+00 +1.20739508E+00 
Cl -5.70692874E-01 -1.03601475E+00 -1.77699943E+00 
H  +2.85173371E+00 -2.20582033E+00 +1.16385508E+00 
C  +6.22145076E-01 +6.11913746E-01 +7.12350692E-01 
N  +1.74000414E+00 +1.33563819E+00 +1.04734885E+00 
C  +1.50302023E+00 +2.77825610E+00 +1.04379253E+00 
C  -1.24659765E-02 +2.83087453E+00 +1.18213694E+00 
N  -4.01684503E-01 +1.52293584E+00 +6.57357140E-01 
H  -3.24516153E-01 +2.92210179E+00 +2.23927061E+00 
H  +2.03234643E+00 +3.27281284E+00 +1.87061659E+00 
C  -1.79188352E+00 +1.18645390E+00 +6.27447533E-01 
C  -2.40029201E+00 +5.46973053E-01 +1.71640893E+00 
C  -2.53087558E+00 +1.56903757E+00 -5.05922161E-01 
C  -3.76782327E+00 +2.60511278E-01 +1.62677570E+00 
C  -3.89006588E+00 +1.27392974E+00 -5.42357832E-01 
C  -4.52273013E+00 +6.04482011E-01 +5.09867772E-01 
H  -4.24666911E+00 -2.59878862E-01 +2.46034066E+00 
H  -4.46638579E+00 +1.54957270E+00 -1.42946376E+00 
C  +3.07320526E+00 +8.52602203E-01 +9.15979868E-01 
C  +3.61608341E+00 +6.20676420E-01 -3.59252486E-01 
C  +3.81374880E+00 +6.28011749E-01 +2.08175169E+00 
C  +4.93651138E+00 +1.75679286E-01 -4.34933027E-01 
C  +5.13370988E+00 +1.84305893E-01 +1.95916037E+00 
C  +5.71055317E+00 -4.29669781E-02 +7.09257006E-01 
H  +5.36975964E+00 -1.71244022E-02 -1.42043490E+00 
H  +5.71655908E+00 -4.79535440E-03 +2.86451210E+00 
C  -1.84561013E+00 +2.22511187E+00 -1.67188603E+00 
H  -2.57104562E+00 +2.46751007E+00 -2.45999753E+00 
H  -1.33108493E+00 +3.15402487E+00 -1.37932787E+00 
H  -1.09438493E+00 +1.52789755E+00 -2.07493003E+00 
C  -1.64301573E+00 +1.36610205E-01 +2.95249966E+00 
H  -7.31309492E-01 +7.31593384E-01 +3.09868493E+00 
H  -2.28510553E+00 +2.39849503E-01 +3.83949461E+00 
H  -1.32161670E+00 -9.13134795E-01 +2.85890231E+00 
C  +3.15501373E+00 +7.88388465E-01 +3.42487636E+00 
H  +3.85006432E+00 +5.33678588E-01 +4.23597462E+00 
H  +2.79799374E+00 +1.81751266E+00 +3.58507105E+00 
H  +2.27662005E+00 +1.25340356E-01 +3.47754016E+00 
C  +2.77036415E+00 +7.80315088E-01 -1.59071441E+00 
H  +2.00848497E+00 -1.75227383E-02 -1.63631424E+00 
H  +2.21264635E+00 +1.72870508E+00 -1.58220229E+00 
H  +3.38869815E+00 +7.44580804E-01 -2.49722864E+00 
H  -4.75342009E-01 +3.64587767E+00 +6.09532386E-01 
H  +1.84462381E+00 +3.22393632E+00 +9.16939825E-02 
C  +7.13468814E+00 -5.21749428E-01 +5.82791647E-01 
H  +7.18769630E+00 -1.44553988E+00 -1.22485725E-02 
H  +7.76193003E+00 +2.29465760E-01 +7.82112381E-02 
H  +7.57525250E+00 -7.25097061E-01 +1.56823549E+00 
C  -5.97839269E+00 +2.27646335E-01 +4.11847438E-01 
H  -6.55987598E+00 +1.00431751E+00 -1.05885041E-01 
H  -6.09262314E+00 -7.08472553E-01 -1.56823263E-01 
H  -6.41802360E+00 +6.87032030E-02 +1.40629635E+00 
54
Ru-5_isom-1_M06-2X
Ru +4.95770808E-01 -1.14395648E+00 +1.19544490E-01 
Cl -8.89445725E-01 -1.50584843E+00 +2.12262310E+00 
N  +3.58926211E-01 +1.73214205E+00 -4.67679959E-01 
N  +1.50596804E+00 +1.41378598E+00 +1.35886670E+00 
C  -5.25878573E-01 -1.49483559E+00 -1.19511878E+00 
C  +8.11612273E-01 +7.60358121E-01 +3.76364178E-01 
C  -5.35746725E-01 +1.53400785E+00 -1.56032423E+00 
C  -1.91401575E+00 +1.47902151E+00 -1.32359559E+00 
C  -2.44631943E+00 +1.48312283E+00 +8.29135622E-02 
C  -2.75966871E+00 +1.32124139E+00 -2.42200041E+00 
C  -2.25918642E+00 +1.19348482E+00 -3.71925108E+00 
C  -3.19328928E+00 +9.64013123E-01 -4.88026796E+00 
C  -8.76959230E-01 +1.22243405E+00 -3.91146361E+00 
C  +3.95827390E-03 +1.38242374E+00 -2.84125118E+00 
C  +1.49483253E+00 +1.30578532E+00 -3.02192360E+00 
C  +6.37928904E-01 +3.08575360E+00 +2.67942130E-03 
C  +1.69506196E+00 +2.83490784E+00 +1.07609189E+00 
C  +2.29587022E+00 +7.84016567E-01 +2.36923265E+00 
C  +3.62113668E+00 +4.16639625E-01 +2.09987329E+00 
C  +4.29064095E+00 +7.42358998E-01 +7.90897448E-01 
C  +4.34805865E+00 -2.08917477E-01 +3.11816623E+00 
C  +3.79887352E+00 -4.41402293E-01 +4.37731502E+00 
C  +2.49877183E+00 +4.80317680E-03 +4.63246933E+00 
C  +1.73335425E+00 +6.26706143E-01 +3.64786052E+00 
C  +3.53475609E-01 +1.14702735E+00 +3.94175990E+00 
C  +4.57771560E+00 -1.17566467E+00 +5.43831898E+00 
H  +4.97706807E+00 -6.34542627E-02 +5.03048843E-01 
H  +3.56631333E+00 +8.40343718E-01 -2.62518739E-02 
H  +4.86813905E+00 +1.67826232E+00 +8.89516781E-01 
H  +5.37313599E+00 -5.26716920E-01 +2.90988420E+00 
H  +4.30541133E+00 -2.24277625E+00 +5.44600472E+00 
H  +5.65967751E+00 -1.10925300E+00 +5.25815087E+00 
H  +4.36649176E+00 -7.73648212E-01 +6.43976276E+00 
H  +2.06377173E+00 -1.40455563E-01 +5.62471972E+00 
H  +2.83204565E-01 +2.22216317E+00 +3.71031915E+00 
H  -3.90202895E-01 +6.14443989E-01 +3.33128241E+00 
H  +1.06555522E-01 +1.00436930E+00 +5.00231266E+00 
H  +2.71640035E+00 +3.01591657E+00 +6.97674173E-01 
H  +1.54512141E+00 +3.43902196E+00 +1.98211726E+00 
H  +1.00054985E+00 +3.71718355E+00 -8.20993814E-01 
H  -2.74382895E-01 +3.54832069E+00 +4.19060460E-01 
H  -2.04046134E+00 +2.31344586E+00 +6.80102730E-01 
H  -2.15325703E+00 +5.47987914E-01 +5.91106654E-01 
H  -3.54194291E+00 +1.55746425E+00 +8.59990896E-02 
H  -3.83877809E+00 +1.26755411E+00 -2.25400547E+00 
H  -2.74533305E+00 +1.29805254E+00 -5.82670586E+00 
H  -4.14466371E+00 +1.49705848E+00 -4.74041585E+00 
H  -3.42518530E+00 -1.08007552E-01 -4.98085860E+00 
H  -4.70062884E-01 +1.09261315E+00 -4.91785841E+00 
H  +1.75753361E+00 +1.24061005E+00 -4.08616578E+00 
H  +2.00453001E+00 +2.18075451E+00 -2.58891739E+00 
H  +1.88362925E+00 +4.11744317E-01 -2.50385521E+00 
Cl +2.75765433E+00 -1.72428777E+00 -6.63715765E-01 
H  -3.50464075E-01 -2.63272010E+00 -8.71418768E-01 
54
Ru-5_isom-2_M06-2X
Ru +8.59550192E-01 -1.21401046E+00 -1.94132408E-01 
Cl -2.22743675E-01 -1.68979268E+00 +1.93904094E+00 
N  +5.97301696E-01 +1.69584681E+00 -6.28089789E-01 
N  +1.72500569E+00 +1.35105354E+00 +1.20332742E+00 
C  -2.89999433E-01 -1.76179364E+00 -1.34969743E+00 
C  +1.06321237E+00 +7.07338689E-01 +1.98094290E-01 
C  -4.26600728E-01 +1.50331255E+00 -1.60398564E+00 
C  -1.75285181E+00 +1.31015572E+00 -1.18660306E+00 
C  -2.09589894E+00 +1.18076292E+00 +2.72404279E-01 
C  -2.73691201E+00 +1.17174525E+00 -2.16774847E+00 
C  -2.42783556E+00 +1.20772022E+00 -3.52948007E+00 
C  -3.50351091E+00 +9.99485023E-01 -4.56506661E+00 
C  -1.09768552E+00 +1.39734625E+00 -3.90695316E+00 
C  -8.09626894E-02 +1.54798209E+00 -2.96010365E+00 
C  +1.35705559E+00 +1.70386822E+00 -3.36885629E+00 
C  +8.09344925E-01 +3.04085644E+00 -9.48403678E-02 
C  +1.86627560E+00 +2.78855902E+00 +9.76998400E-01 
C  +2.36994623E+00 +7.50801221E-01 +2.32793838E+00 
C  +3.68322088E+00 +2.79127732E-01 +2.24021541E+00 
C  +4.49300656E+00 +3.58059907E-01 +9.74784112E-01 
C  +4.26102582E+00 -2.73909138E-01 +3.39238599E+00 
C  +3.57647802E+00 -3.43223500E-01 +4.60026294E+00 
C  +2.27927697E+00 +1.79810670E-01 +4.66307813E+00 
C  +1.66169276E+00 +7.30446042E-01 +3.54584449E+00 
C  +2.61914131E-01 +1.27443608E+00 +3.61862354E+00 
C  +4.19854974E+00 -9.81843112E-01 +5.81539232E+00 
H  -9.52673928E-01 -1.15370379E+00 -2.01504824E+00 
H  +4.65845196E+00 -6.45792894E-01 +5.59238704E-01 
H  +3.98022940E+00 +9.17485834E-01 +1.84248546E-01 
H  +5.47073868E+00 +8.19751943E-01 +1.18251654E+00 
H  +5.28261796E+00 -6.59275955E-01 +3.32954474E+00 
H  +3.75006201E+00 -1.96956475E+00 +6.00434814E+00 
H  +5.27985439E+00 -1.12346804E+00 +5.68249222E+00 
H  +4.03724932E+00 -3.69751659E-01 +6.71514630E+00 
H  +1.72843688E+00 +1.42178103E-01 +5.60659906E+00 
H  +2.14338627E-01 +2.32068266E+00 +3.27635880E+00 
H  -3.93270657E-01 +6.68959089E-01 +2.97447804E+00 
H  -1.16116766E-01 +1.23118214E+00 +4.64867541E+00 
H  +2.88502318E+00 +3.01363285E+00 +6.15096336E-01 
H  +1.69269856E+00 +3.35448604E+00 +1.90342396E+00 
H  +1.14947683E+00 +3.72788424E+00 -8.82353204E-01 
H  -1.28431584E-01 +3.43926917E+00 +3.33058592E-01 
H  -1.61678356E+00 +1.96274427E+00 +8.80210231E-01 
H  -1.73487818E+00 +2.13038500E-01 +6.61205956E-01 
H  -3.18207804E+00 +1.24153275E+00 +4.22303096E-01 
H  -3.77260573E+00 +1.01300152E+00 -1.85517694E+00 
H  -3.21825743E+00 +1.43868177E+00 -5.53115031E+00 
H  -4.45559659E+00 +1.44854696E+00 -4.24786854E+00 
H  -3.68224715E+00 -7.52479612E-02 -4.72682085E+00 
H  -8.36806062E-01 +1.41890426E+00 -4.96836890E+00 
H  +1.44769532E+00 +1.74710006E+00 -4.46255992E+00 
H  +1.79745754E+00 +2.62088549E+00 -2.94709448E+00 
H  +1.94840721E+00 +8.55406130E-01 -2.98656643E+00 
Cl +2.88615191E+00 -1.13819054E+00 -1.57857055E+00 
54
Ru-5_isom-3_M06-2X
Ru +8.40930122E-01 -1.29232255E+00 +9.69933270E-02 
Cl +1.03447387E+00 -2.72846396E+00 +2.10733531E+00 
N  +2.42712205E-01 +1.70105856E+00 -3.77066292E-01 
N  +1.79168099E+00 +1.33602630E+00 +1.10895233E+00 
C  -6.57028558E-01 -1.31724812E+00 -7.30147387E-01 
C  +9.10587657E-01 +7.01848266E-01 +2.78256680E-01 
C  -6.35725114E-01 +1.54868035E+00 -1.48941511E+00 
C  -2.00371291E+00 +1.76301457E+00 -1.27718322E+00 
C  -2.51568341E+00 +2.01166931E+00 +1.16362290E-01 
C  -2.87210220E+00 +1.66909929E+00 -2.36617008E+00 
C  -2.40131266E+00 +1.36364623E+00 -3.64476554E+00 
C  -3.34802303E+00 +1.22816155E+00 -4.81022391E+00 
C  -1.03121125E+00 +1.15836993E+00 -3.82107795E+00 
C  -1.25835315E-01 +1.24486466E+00 -2.76077334E+00 
C  +1.33617660E+00 +9.70285747E-01 -2.96228547E+00 
C  +8.03365032E-01 +3.03026105E+00 -1.25761831E-01 
C  +1.61721155E+00 +2.78849357E+00 +1.13826394E+00 
C  +2.45065218E+00 +7.20838145E-01 +2.22105107E+00 
C  +3.84622273E+00 +5.89034751E-01 +2.18576281E+00 
C  +4.62742817E+00 +1.02240789E+00 +9.76573626E-01 
C  +4.47950236E+00 +2.33714863E-02 +3.29296905E+00 
C  +3.76152718E+00 -3.96765802E-01 +4.41400677E+00 
C  +2.37899853E+00 -2.18045664E-01 +4.42729759E+00 
C  +1.70067407E+00 +3.39039519E-01 +3.34271691E+00 
C  +2.01784208E-01 +4.65108698E-01 +3.36706388E+00 
C  +4.45705799E+00 -1.07522640E+00 +5.56556806E+00 
H  -1.66331836E+00 -8.41101439E-01 -7.94577289E-01 
H  +5.70347661E+00 +8.77251500E-01 +1.14171638E+00 
H  +4.31568910E+00 +4.27619656E-01 +1.03112533E-01 
H  +4.45653731E+00 +2.08568816E+00 +7.43649436E-01 
H  +5.56494626E+00 -1.03747227E-01 +3.26965374E+00 
H  +4.42662856E+00 -2.16844342E+00 +5.43558941E+00 
H  +5.51238312E+00 -7.74773627E-01 +5.63078516E+00 
H  +3.96877514E+00 -8.41735086E-01 +6.52256045E+00 
H  +1.80105516E+00 -5.47211998E-01 +5.29455796E+00 
H  -1.47499711E-01 +1.38053884E+00 +2.86671522E+00 
H  -2.36989395E-01 -3.95862141E-01 +2.83808773E+00 
H  -1.67286275E-01 +4.66976320E-01 +4.40167486E+00 
H  +2.58663526E+00 +3.30486254E+00 +1.13699245E+00 
H  +1.06695634E+00 +3.08192055E+00 +2.05063974E+00 
H  +1.43764090E+00 +3.33967416E+00 -9.75224130E-01 
H  +7.66197180E-03 +3.77787796E+00 +2.64666820E-03 
H  -2.07302297E+00 +2.91624069E+00 +5.61427813E-01 
H  -2.24347550E+00 +1.16789852E+00 +7.70093894E-01 
H  -3.60771375E+00 +2.12587685E+00 +1.17924592E-01 
H  -3.94285469E+00 +1.82223692E+00 -2.20759804E+00 
H  -3.46142587E+00 +1.71566723E-01 -5.09811523E+00 
H  -2.97421563E+00 +1.76996481E+00 -5.69141860E+00 
H  -4.34463436E+00 +1.61860351E+00 -4.56290091E+00 
H  -6.49379965E-01 +9.13361429E-01 -4.81593773E+00 
H  +1.59980346E+00 +1.02314642E+00 -4.02690850E+00 
H  +1.96867529E+00 +1.67696709E+00 -2.40570613E+00 
H  +1.59866885E+00 -2.89793863E-02 -2.57723013E+00 
Cl +3.15293116E+00 -1.51912670E+00 -1.01631583E+00 
61
Ru-2_wB97XD
Ru +2.05347400E-04 +1.08854156E+00 +7.78142040E-03 
Cl -3.95617096E-01 +1.14470083E+00 +2.37876855E+00 
Cl +3.95913063E-01 +1.17183161E+00 -2.36249339E+00 
C  -1.33109154E+00 +2.48800841E+00 -1.91886641E-01 
H  -2.04141880E+00 +2.59984467E+00 +6.34747557E-01 
C  -6.97087000E-05 -9.44550207E-01 -4.66681780E-03 
H  -1.75064393E+00 +2.60836526E+00 -1.19705073E+00 
N  -1.09157170E+00 -1.71503530E+00 -7.34971496E-02 
C  -7.69915130E-01 -3.14267732E+00 +2.43145485E-02 
C  +7.64379050E-01 -3.14398321E+00 -6.08616976E-02 
N  +1.08960989E+00 -1.71839082E+00 +5.42992262E-02 
H  +1.23900456E+00 -3.71386067E+00 +7.49879516E-01 
H  -1.13694252E+00 -3.54535026E+00 +9.80984734E-01 
C  +2.42922739E+00 -1.20892015E+00 +3.92122695E-02 
C  +3.03746890E+00 -8.85800740E-01 +1.26203795E+00 
C  +3.09610482E+00 -1.05687251E+00 -1.18595075E+00 
C  +4.31645654E+00 -3.28176498E-01 +1.22711328E+00 
C  +4.37288117E+00 -4.94047552E-01 -1.16638974E+00 
C  +4.99040123E+00 -1.07410963E-01 +2.43333072E-02 
H  +4.79998149E+00 -6.26647374E-02 +2.17077267E+00 
H  +4.89769299E+00 -3.51806915E-01 -2.11450819E+00 
C  -2.42969952E+00 -1.20203849E+00 -5.00368242E-02 
C  -3.03944896E+00 -8.63768222E-01 -1.26826429E+00 
C  -3.09352529E+00 -1.06088870E+00 +1.17784604E+00 
C  -4.31645301E+00 -3.02768500E-01 -1.22482347E+00 
C  -4.36870311E+00 -4.93682736E-01 +1.16690110E+00 
C  -4.98736837E+00 -9.26619600E-02 -1.81903308E-02 
H  -4.80106042E+00 -2.56293201E-02 -2.16458591E+00 
H  -4.89094783E+00 -3.59676710E-01 +2.11763234E+00 
C  +2.49087230E+00 -1.52276377E+00 -2.48267937E+00 
H  +2.92230860E+00 -9.74190062E-01 -3.33002972E+00 
H  +2.69659543E+00 -2.59572901E+00 -2.63787457E+00 
H  +1.40667137E+00 -1.35738852E+00 -2.50958478E+00 
C  +2.34064696E+00 -1.13506131E+00 +2.57158490E+00 
H  +1.90481004E+00 -2.14550066E+00 +2.60798593E+00 
H  +3.04560045E+00 -1.03926164E+00 +3.40832456E+00 
H  +1.51850428E+00 -4.18473274E-01 +2.72672301E+00 
C  -2.48894107E+00 -1.54307961E+00 +2.46892463E+00 
H  -2.89720525E+00 -9.82880700E-01 +3.32013529E+00 
H  -2.72264628E+00 -2.61010165E+00 +2.62553843E+00 
H  -1.40057555E+00 -1.40754259E+00 +2.48657865E+00 
C  -2.34553667E+00 -1.10060542E+00 -2.58165313E+00 
H  -1.52123473E+00 -3.85018245E-01 -2.72978752E+00 
H  -1.91318244E+00 -2.11201865E+00 -2.63023026E+00 
H  -3.05143920E+00 -9.92904985E-01 -3.41614102E+00 
H  +1.13024956E+00 -3.53585337E+00 -1.02237991E+00 
H  -1.24583038E+00 -3.70157449E+00 -7.93285447E-01 
C  -6.34278207E+00 +5.64993427E-01 +4.02935460E-03 
H  -6.23905368E+00 +1.65979822E+00 +7.73622907E-02 
H  -6.91018553E+00 +3.48219752E-01 -9.12401771E-01 
H  -6.93835440E+00 +2.31699280E-01 +8.65825060E-01 
C  +6.34792972E+00 +5.46103232E-01 +1.07713407E-02 
H  +6.95258602E+00 +2.01045854E-01 -8.40082512E-01 
H  +6.24831723E+00 +1.64022783E+00 -7.70156230E-02 
H  +6.90389806E+00 +3.38490533E-01 +9.36206906E-01 
C  -1.24574900E-04 +3.31800536E+00 +2.05908164E-02 
C  +1.33120523E+00 +2.48592749E+00 +2.23136391E-01 
H  -1.42536832E-01 +3.90566688E+00 +9.34400955E-01 
H  +1.42188949E-01 +3.91634049E+00 -8.86288682E-01 
H  +1.75093506E+00 +2.59491566E+00 +1.22952353E+00 
H  +2.04125987E+00 +2.60768408E+00 -6.02326305E-01 
27
DBU_wB97XD
H  +1.59856327E+00 +1.59534881E+00 -9.72166888E-01 
C  +4.99035588E-01 +1.51868412E+00 -1.03949595E+00 
H  +2.04960122E-01 +1.94098214E+00 -2.00765527E+00 
C  -1.50118634E-01 +2.31380403E+00 +1.04893895E-01 
H  -1.21526201E+00 +2.03190304E+00 +1.73700320E-01 
H  -1.31967340E-01 +3.38227855E+00 -1.62857249E-01 
C  +5.27676359E-01 +2.15296453E+00 +1.46680575E+00 
H  +1.56948211E+00 +2.51469962E+00 +1.38425477E+00 
H  +3.26907417E-02 +2.81283495E+00 +2.19798305E+00 
C  +5.54236739E-01 +7.26708324E-01 +2.01606316E+00 
H  -4.71205049E-01 +3.77146670E-01 +2.22930841E+00 
H  +1.09578352E+00 +7.25778066E-01 +2.97674411E+00 
C  +1.22138203E+00 -2.79081620E-01 +1.07235466E+00 
H  +2.16267670E+00 +1.42358205E-01 +6.80356251E-01 
H  +1.51016530E+00 -1.17915723E+00 +1.63510585E+00 
N  +3.77159792E-01 -7.28658664E-01 -2.15782983E-02 
C  +6.68401141E-02 +7.11810068E-02 -1.10418896E+00 
C  -1.02178489E+00 -1.68237040E+00 -2.18735015E+00 
H  -2.11736276E-01 -2.31852354E+00 -2.59527774E+00 
H  -1.86401911E+00 -1.76456434E+00 -2.89122823E+00 
C  -1.42426085E+00 -2.19454853E+00 -8.07726365E-01 
H  -1.74111980E+00 -3.24788781E+00 -8.36676752E-01 
H  -2.27718235E+00 -1.59874283E+00 -4.42598702E-01 
C  -2.45025490E-01 -2.03696701E+00 +1.38422340E-01 
H  -5.79995444E-01 -2.14455017E+00 +1.18480244E+00 
H  +5.00929191E-01 -2.83383062E+00 -4.41521541E-02 
N  -5.88004341E-01 -2.97689305E-01 -2.14764231E+00 
22
Et3N_wB97XD
N  +4.02486930E-01 +6.40385825E-01 +2.84692685E-02 
C  +4.77393600E-01 +8.98812308E-01 -1.39893850E+00 
H  +1.54431704E+00 +9.64713432E-01 -1.67213579E+00 
H  +5.93861138E-02 +1.90687462E+00 -1.56677374E+00 
C  -2.22422338E-01 -8.25788403E-02 -2.34890784E+00 
H  +2.62294896E-01 -1.07037170E+00 -2.34848853E+00 
H  -1.89607063E-01 +3.01820709E-01 -3.38069315E+00 
H  -1.28073463E+00 -2.22205771E-01 -2.07781692E+00 
C  +1.18607875E+00 -4.83185937E-01 +5.21843926E-01 
H  +2.11535098E+00 -5.13098998E-01 -6.96761220E-02 
H  +1.50077965E+00 -2.61736323E-01 +1.55707853E+00 
C  +5.31911656E-01 -1.87122069E+00 +5.10751068E-01 
H  +1.24159131E+00 -2.62025142E+00 +8.95651316E-01 
H  +2.25266231E-01 -2.18184650E+00 -4.98197888E-01 
H  -3.60255225E-01 -1.90465318E+00 +1.15564922E+00 
C  -9.24965739E-01 +7.87235279E-01 +5.98145365E-01 
H  -1.60385621E+00 -6.02198702E-02 +3.55047684E-01 
H  -1.37794654E+00 +1.67855158E+00 +1.32951348E-01 
C  -8.99051840E-01 +9.83381497E-01 +2.11007247E+00 
H  -2.21891620E-01 +1.80912917E+00 +2.37644862E+00 
H  -5.58807613E-01 +7.94914029E-02 +2.63867347E+00 
H  -1.90731835E+00 +1.22077340E+00 +2.48114619E+00 
64
PCy3enolate_wB97XD
C  -1.31978115E+00 +1.40195158E+00 -2.31586996E+00 
C  -1.27640956E+00 +4.19586229E-01 -1.13354046E+00 
C  -1.76786343E+00 -9.73910731E-01 -1.54793470E+00 
C  -3.18647041E+00 -8.90706871E-01 -2.11881055E+00 
C  -3.26678587E+00 +1.04075061E-01 -3.27803423E+00 
C  -2.74575258E+00 +1.48253815E+00 -2.86780040E+00 
P  +2.96287814E-01 +4.15957375E-01 -1.84858514E-01 
C  +1.71107470E+00 -3.81900942E-01 -1.08456921E+00 
C  +1.75918040E+00 -1.91842967E+00 -1.05661538E+00 
C  +3.04447546E+00 -2.43433498E+00 -1.71195436E+00 
C  +3.21848510E+00 -1.89963326E+00 -3.13345860E+00 
C  +3.15619503E+00 -3.72372523E-01 -3.15864578E+00 
C  +1.85914399E+00 +1.35299625E-01 -2.52533371E+00 
C  +7.02997999E-01 +2.18853862E+00 +2.13765053E-01 
C  -4.69422202E-01 +2.90979216E+00 +7.59258755E-01 
C  -6.63561221E-01 +3.13808790E+00 +2.12734583E+00 
O  -1.55352095E+00 +3.75833545E+00 +2.70208486E+00 
C  +1.97714222E-02 -6.01003093E-01 +1.32991212E+00 
C  -1.28475784E+00 -2.93946757E-01 +2.08643064E+00 
C  -1.43533822E+00 -1.23850851E+00 +3.28155640E+00 
C  -2.29605625E-01 -1.15668712E+00 +4.21730390E+00 
C  +1.06750275E+00 -1.45354639E+00 +3.46465998E+00 
C  +1.23931446E+00 -5.17786140E-01 +2.26605037E+00 
O  +3.35873367E-01 +2.50988243E+00 +2.92118533E+00 
C  +2.03808893E-01 +2.74437763E+00 +4.30537152E+00 
H  +1.54514139E+00 +2.13675192E+00 +9.21560569E-01 
H  -5.60771427E-02 -1.63472476E+00 +9.44817405E-01 
H  -1.26993684E+00 +7.47437788E-01 +2.43340451E+00 
H  -2.15414652E+00 -4.03860929E-01 +1.42044541E+00 
H  -2.36009647E+00 -9.90545496E-01 +3.82451672E+00 
H  -1.54835738E+00 -2.27804480E+00 +2.92043496E+00 
H  -1.75173847E-01 -1.41150533E-01 +4.64510526E+00 
H  -3.50337061E-01 -1.85503765E+00 +5.06022829E+00 
H  +1.05819981E+00 -2.50319977E+00 +3.11617650E+00 
H  +1.93478511E+00 -1.35198554E+00 +4.13543648E+00 
H  +2.16806793E+00 -7.69440997E-01 +1.72744500E+00 
H  +1.32260035E+00 +5.21397737E-01 +2.62012633E+00 
H  +2.58060891E+00 -8.21821070E-03 -5.09392388E-01 
H  +1.70507573E+00 -2.29424258E+00 -2.46313422E-02 
H  +8.83237344E-01 -2.32478713E+00 -1.59123815E+00 
H  +3.90745722E+00 -2.12122077E+00 -1.09723060E+00 
H  +3.04242764E+00 -3.53530035E+00 -1.71121471E+00 
H  +2.41622247E+00 -2.30543371E+00 -3.77613589E+00 
H  +4.17043836E+00 -2.25228374E+00 -3.55929979E+00 
H  +3.23520919E+00 +5.46963100E-04 -4.19133264E+00 
H  +4.01774377E+00 +4.21936926E-02 -2.60558068E+00 
H  +1.00788715E+00 -2.28511620E-01 -3.12555388E+00 
H  +1.82392517E+00 +1.23512861E+00 -2.55408257E+00 
H  -1.95783762E+00 +8.33257387E-01 -3.67687279E-01 
H  -1.09142249E+00 -1.38834068E+00 -2.31695010E+00 
H  -1.74665467E+00 -1.67138251E+00 -6.95659697E-01 
H  -3.51732610E+00 -1.88957622E+00 -2.44317407E+00 
H  -3.87482297E+00 -5.73273424E-01 -1.31563716E+00 
H  -4.30314538E+00 +1.79485508E-01 -3.64190787E+00 
H  -2.66352209E+00 -2.75409251E-01 -4.12322084E+00 
H  -3.40525163E+00 +1.91268169E+00 -2.09384741E+00 
H  -2.77250109E+00 +2.17346106E+00 -3.72436200E+00 
H  -9.84961348E-01 +2.39934931E+00 -1.99844145E+00 
H  -6.44505656E-01 +1.06742485E+00 -3.11915620E+00 
H  -1.16177613E+00 +3.40442187E+00 +7.88507956E-02 
H  +1.02498600E+00 +2.19536378E+00 +4.79073121E+00 
H  -7.64671094E-01 +2.38533170E+00 +4.69126825E+00 
H  +2.79924934E-01 +3.81576182E+00 +4.54961498E+00 
H  +1.09664269E+00 +2.60031973E+00 -7.33324907E-01 
88
TS-1_DBU_wB97XD
N  +3.54689467E+00 +6.44789411E-01 +1.68656945E+00 
C  +4.09799088E+00 -2.97777950E-01 +9.75241292E-01 
N  +5.09134705E+00 -1.09513722E+00 +1.44141463E+00 
C  +5.45655595E+00 -1.10808616E+00 +2.85734920E+00 
C  +4.38178317E+00 -4.50472016E-01 +3.70605986E+00 
C  +3.98217968E+00 +8.65283537E-01 +3.05350230E+00 
C  +5.80334588E+00 -2.03900981E+00 +5.81926156E-01 
C  +4.99553943E+00 -3.28402780E+00 +2.08055004E-01 
C  +3.98599501E+00 -3.03994737E+00 -9.13536301E-01 
C  +2.97865664E+00 -1.92842022E+00 -6.31213957E-01 
C  +3.58428634E+00 -5.31378956E-01 -4.18505492E-01 
C  +1.00461925E+00 +1.43688896E+00 +1.54571057E+00 
C  +8.65204042E-01 +2.47565725E+00 +4.91468834E-01 
Ru -7.20740140E-01 +1.21466281E+00 +2.68693966E-01 
C  -2.40797118E+00 +4.87034243E-01 -7.47198162E-01 
N  -2.69308557E+00 -8.20667868E-01 -9.00629875E-01 
C  -3.96610427E+00 -1.04820354E+00 -1.59033838E+00 
C  -4.30388996E+00 +3.50253353E-01 -2.11483849E+00 
N  -3.35945720E+00 +1.19407100E+00 -1.37621422E+00 
C  -1.88433163E+00 -1.89626872E+00 -4.16821022E-01 
C  -1.93961883E+00 -2.24156649E+00 +9.40081696E-01 
C  -1.07008759E+00 -3.23392580E+00 +1.40141700E+00 
C  -1.80718302E-01 -3.88699285E+00 +5.48295012E-01 
C  -2.06588818E-01 -3.56546611E+00 -8.10176705E-01 
C  -1.05315317E+00 -2.58034175E+00 -1.31761397E+00 
C  -3.44559022E+00 +2.62317240E+00 -1.39203531E+00 
C  -2.72994728E+00 +3.35105083E+00 -2.35202389E+00 
C  -2.82923834E+00 +4.74496859E+00 -2.32162328E+00 
C  -3.62356087E+00 +5.40646967E+00 -1.38551148E+00 
C  -4.35495025E+00 +4.64273188E+00 -4.72531519E-01 
C  -4.28520897E+00 +3.25090106E+00 -4.58309660E-01 
C  -1.88982967E+00 +2.66268560E+00 -3.39352181E+00 
C  -5.07456022E+00 +2.44570030E+00 +5.37420281E-01 
C  -3.68358892E+00 +6.91164362E+00 -1.34296852E+00 
C  -2.88810618E+00 -1.55423002E+00 +1.88403202E+00 
C  -1.08194549E+00 -2.28991672E+00 -2.79366502E+00 
C  +8.02314559E-01 -4.90244781E+00 +1.07241817E+00 
Cl +4.90946682E-01 +5.20510749E-01 -1.76764894E+00 
Cl -2.00146473E+00 +1.98625602E+00 +2.14428341E+00 
C  +4.56945572E-01 +2.87379412E-02 +1.28223041E+00 
H  +1.05710837E+00 -6.64914168E-01 +6.85067575E-01 
H  +7.24009886E-02 -4.16914734E-01 +2.20997637E+00 
H  -4.12825435E+00 +4.47392872E-01 -3.19866233E+00 
H  -3.84894145E+00 -1.78727361E+00 -2.39409051E+00 
H  -2.26936157E+00 +5.32712281E+00 -3.05828816E+00 
H  -4.99374784E+00 +5.14550089E+00 +2.58245621E-01 
H  -1.08969304E+00 -3.49718946E+00 +2.46247912E+00 
H  +4.63384064E-01 -4.08838243E+00 -1.49872220E+00 
H  -5.70026164E+00 +3.10155424E+00 +1.15752711E+00 
H  -5.73808940E+00 +1.71958064E+00 +4.08044395E-02 
H  -4.39059890E+00 +1.89541079E+00 +1.20117811E+00 
H  -2.48475748E+00 +1.93571201E+00 -3.96943363E+00 
H  -1.47931800E+00 +3.39368816E+00 -4.10329168E+00 
H  -1.05205533E+00 +2.10844590E+00 -2.94262031E+00 
H  -1.38980339E-01 -2.59492445E+00 -3.26738408E+00 
H  -1.89647767E+00 -2.85070483E+00 -3.28386649E+00 
H  -1.21572989E+00 -1.21808319E+00 -2.98460782E+00 
H  -2.55109349E+00 -5.33024156E-01 +2.12666228E+00 
H  -3.89293125E+00 -1.45939794E+00 +1.44519463E+00 
H  -2.97870095E+00 -2.11977176E+00 +2.82161470E+00 
H  -5.34013754E+00 +6.49176457E-01 -1.90705059E+00 
H  -4.71886700E+00 -1.42676806E+00 -8.78986938E-01 
H  +1.80989152E+00 -4.46024405E+00 +1.15609809E+00 
H  +5.16279898E-01 -5.26720391E+00 +2.06912492E+00 
H  +8.82963073E-01 -5.76954490E+00 +3.99849519E-01 
H  -3.33150184E+00 +7.35673672E+00 -2.28437064E+00 
H  -4.70794968E+00 +7.26695400E+00 -1.15629306E+00 
H  -3.04819959E+00 +7.30083610E+00 -5.31005751E-01 
H  +2.30527392E+00 +1.07937807E+00 +1.47936504E+00 
H  +6.81687366E-01 +1.80370045E+00 +2.52748896E+00 
H  +1.53211375E+00 +2.45490243E+00 -3.76866539E-01 
H  +6.72780216E-01 +3.47752227E+00 +8.95332793E-01 
H  +2.81534839E+00 +2.23721923E-01 -6.26660964E-01 
H  +4.39809861E+00 -3.54193829E-01 -1.14232728E+00 
H  +2.26721982E+00 -1.84488049E+00 -1.46582989E+00 
H  +2.36587556E+00 -2.19472237E+00 +2.46833219E-01 
H  +4.53889460E+00 -2.79761091E+00 -1.83933267E+00 
H  +3.44103392E+00 -3.97586981E+00 -1.11795223E+00 
H  +4.48372337E+00 -3.65402371E+00 +1.11406828E+00 
H  +5.69912742E+00 -4.07384798E+00 -1.01652482E-01 
H  +6.15061321E+00 -1.52324076E+00 -3.27675932E-01 
H  +6.70991258E+00 -2.32795112E+00 +1.13199247E+00 
H  +3.15294157E+00 +1.34456044E+00 +3.59422141E+00 
H  +4.83003213E+00 +1.57302672E+00 +3.06625655E+00 
H  +4.75734765E+00 -2.96108488E-01 +4.72741056E+00 
H  +3.49731339E+00 -1.10472283E+00 +3.76690117E+00 
H  +6.42576035E+00 -5.95272351E-01 +2.99236553E+00 
H  +5.59635554E+00 -2.15722164E+00 +3.16267046E+00 
83
TS-1_Et3N_wB97XD
Ru -4.60944836E-01 +3.77275207E-01 +4.32848300E-01 
Cl +7.06306012E-01 +6.01576315E-01 -1.72691007E+00 
Cl -1.66481236E+00 +3.31457695E-01 +2.51278412E+00 
C  +9.46566119E-01 -9.17948744E-01 +8.91876174E-01 
H  +1.57843572E+00 -1.23237569E+00 +5.02991331E-02 
C  -2.13555234E+00 -1.33810332E-01 -7.25210599E-01 
H  +6.80572095E-01 -1.73789217E+00 +1.57340230E+00 
N  -2.58328293E+00 -1.39292053E+00 -8.82376581E-01 
C  -3.68500191E+00 -1.49606462E+00 -1.84362430E+00 
C  -4.00104632E+00 -2.61986574E-02 -2.14329476E+00 
N  -2.90868667E+00 +6.77369343E-01 -1.46536046E+00 
H  -3.99791779E+00 +1.98457505E-01 -3.21895240E+00 
H  -3.35750217E+00 -2.04748181E+00 -2.73920588E+00 
C  -2.78908184E+00 +2.10196434E+00 -1.51825503E+00 
C  -2.18829958E+00 +2.69533703E+00 -2.63966238E+00 
C  -3.32266692E+00 +2.87121516E+00 -4.73352817E-01 
C  -2.06309176E+00 +4.08421938E+00 -2.65747607E+00 
C  -3.17036433E+00 +4.25869919E+00 -5.37345100E-01 
C  -2.53061803E+00 +4.88028662E+00 -1.60965536E+00 
H  -1.58189483E+00 +4.55733724E+00 -3.51769043E+00 
H  -3.57376076E+00 +4.86889865E+00 +2.75083200E-01 
C  -2.01605880E+00 -2.55046211E+00 -2.59771824E-01 
C  -2.56918804E+00 -3.00363768E+00 +9.47553441E-01 
C  -9.46716152E-01 -3.21280080E+00 -8.76788868E-01 
C  -1.98031562E+00 -4.10653117E+00 +1.56554090E+00 
C  -3.90455949E-01 -4.31302534E+00 -2.18808177E-01 
C  -8.81492432E-01 -4.76344948E+00 +1.00652345E+00 
H  -2.39242538E+00 -4.46028321E+00 +2.51433327E+00 
H  +4.51331893E-01 -4.83298003E+00 -6.84267841E-01 
C  -4.05346374E+00 +2.23519956E+00 +6.78107535E-01 
H  -4.63208845E+00 +2.98869538E+00 +1.22969564E+00 
H  -4.75072276E+00 +1.45649124E+00 +3.32905995E-01 
H  -3.35753815E+00 +1.75236001E+00 +1.38239612E+00 
C  -1.72741406E+00 +1.87118261E+00 -3.81122218E+00 
H  -2.57565371E+00 +1.63267042E+00 -4.47595572E+00 
H  -9.87154722E-01 +2.42321189E+00 -4.40582436E+00 
H  -1.25841557E+00 +9.36618504E-01 -3.47819445E+00 
C  -4.02290348E-01 -2.75568915E+00 -2.20179291E+00 
H  +3.82996861E-01 -3.43875040E+00 -2.55424553E+00 
H  -1.18945005E+00 -2.72988598E+00 -2.97206876E+00 
H  +2.03272846E-02 -1.74076155E+00 -2.13367390E+00 
C  -3.75273316E+00 -2.31151981E+00 +1.56531495E+00 
H  -3.47338070E+00 -1.29342091E+00 +1.87685186E+00 
H  -4.59437097E+00 -2.23794386E+00 +8.58712805E-01 
H  -4.10372476E+00 -2.85833666E+00 +2.45088232E+00 
H  -4.97040393E+00 +2.93607398E-01 -1.72818957E+00 
H  -4.53577136E+00 -2.03585574E+00 -1.40383464E+00 
C  -2.46400401E-01 -5.92946867E+00 +1.72018337E+00 
H  +3.09385204E-01 -5.58797468E+00 +2.60841296E+00 
H  -1.00533647E+00 -6.64667721E+00 +2.06767353E+00 
H  +4.58000028E-01 -6.46651212E+00 +1.06929058E+00 
C  -2.33637130E+00 +6.37460239E+00 -1.63520360E+00 
H  -3.07328768E+00 +6.88789343E+00 -1.00105287E+00 
H  -1.33416606E+00 +6.64141092E+00 -1.26191081E+00 
H  -2.42353655E+00 +6.77411368E+00 -2.65632308E+00 
C  +1.30560185E+00 +3.53310341E-01 +1.65450423E+00 
C  +9.61908929E-01 +1.67847268E+00 +1.06643830E+00 
H  +2.66722129E+00 +3.30595460E-01 +1.40220505E+00 
H  +1.02275202E+00 +2.83251332E-01 +2.71168283E+00 
H  +1.54805549E+00 +2.08083308E+00 +2.33799525E-01 
H  +6.75727444E-01 +2.42048034E+00 +1.82273494E+00 
N  +3.94320699E+00 +3.23296699E-01 +1.18229479E+00 
C  +4.37014486E+00 -1.07398134E+00 +1.40036006E+00 
C  +4.05936300E+00 +7.57475547E-01 -2.36792587E-01 
C  +4.44185241E+00 +1.30093904E+00 +2.16927763E+00 
C  +5.31723637E+00 +3.36467999E-01 -9.86600701E-01 
H  +3.96641910E+00 +1.85279366E+00 -2.34362242E-01 
H  +3.16619425E+00 +3.81527348E-01 -7.63335112E-01 
H  +3.85035423E+00 -1.66882696E+00 +6.34697170E-01 
C  +4.02469873E+00 -1.60816706E+00 +2.78255571E+00 
H  +5.45161052E+00 -1.17458914E+00 +1.21155323E+00 
H  +4.07818849E+00 +9.73954945E-01 +3.15425857E+00 
C  +5.94716309E+00 +1.52081035E+00 +2.20774492E+00 
H  +3.91758279E+00 +2.24408938E+00 +1.95279710E+00 
H  +4.22739618E+00 -2.68815555E+00 +2.80696714E+00 
H  +2.96162719E+00 -1.45784384E+00 +3.01796811E+00 
H  +4.63036318E+00 -1.14299812E+00 +3.57402117E+00 
H  +6.19096773E+00 +2.20980055E+00 +3.02950395E+00 
H  +6.32082916E+00 +1.96963278E+00 +1.27668445E+00 
H  +6.49569305E+00 +5.83640378E-01 +2.38656264E+00 
H  +5.28371127E+00 +7.85729673E-01 -1.98952463E+00 
H  +5.37137586E+00 -7.53030553E-01 -1.12345568E+00 
H  +6.24388596E+00 +6.69498976E-01 -4.97811177E-01 
125
TS-1_PCy3enolate_wB97XD
Ru -1.87284599E-01 +3.24888416E-01 -2.89626929E+00 
Cl -9.49623194E-01 -8.60581299E-01 -8.55914415E-01 
Cl +5.03378031E-01 +1.41123719E+00 -4.90793392E+00 
C  +1.45337618E-01 +1.86003559E+00 -1.72077819E+00 
H  -2.69276758E-01 +1.78702914E+00 -7.08688247E-01 
C  -1.91965493E+00 -4.60666644E-01 -3.74754049E+00 
H  +4.26492215E-02 +2.85827668E+00 -2.16634563E+00 
N  -3.17256803E+00 -4.13183182E-02 -3.49781880E+00 
C  -4.17379126E+00 -7.40137757E-01 -4.30964373E+00 
C  -3.36136545E+00 -1.89578788E+00 -4.90105702E+00 
N  -1.98397520E+00 -1.48649694E+00 -4.61008946E+00 
H  -3.57992384E+00 -2.85847465E+00 -4.41040923E+00 
H  -5.01148648E+00 -1.08249692E+00 -3.68764258E+00 
C  -8.50035694E-01 -2.16818921E+00 -5.15823787E+00 
C  -2.47073064E-01 -3.20612175E+00 -4.43576972E+00 
C  -3.93338832E-01 -1.78593509E+00 -6.42932076E+00 
C  +8.74341469E-01 -3.82494462E+00 -4.99472463E+00 
C  +7.25106788E-01 -2.43701019E+00 -6.94606602E+00 
C  +1.38119713E+00 -3.44664027E+00 -6.23765762E+00 
H  +1.36160884E+00 -4.63026488E+00 -4.43870681E+00 
H  +1.10124802E+00 -2.13854129E+00 -7.92795523E+00 
C  -3.52032449E+00 +1.03342114E+00 -2.62028422E+00 
C  -3.33505321E+00 +2.35888697E+00 -3.04622262E+00 
C  -4.06362788E+00 +7.33477241E-01 -1.36376248E+00 
C  -3.63920884E+00 +3.38342354E+00 -2.14924625E+00 
C  -4.36284068E+00 +1.79473574E+00 -5.06309206E-01 
C  -4.14048354E+00 +3.12216962E+00 -8.72117089E-01 
H  -3.48702787E+00 +4.41931001E+00 -2.46430670E+00 
H  -4.78020694E+00 +1.57125705E+00 +4.79660100E-01 
C  -1.08141264E+00 -6.95320216E-01 -7.20381270E+00 
H  -5.89699135E-01 -5.38655988E-01 -8.17311730E+00 
H  -2.13821788E+00 -9.38900709E-01 -7.39949996E+00 
H  -1.03810221E+00 +2.49580563E-01 -6.64200281E+00 
C  -7.84702077E-01 -3.65152794E+00 -3.10280918E+00 
H  -1.86247958E+00 -3.87232093E+00 -3.15796267E+00 
H  -2.72954429E-01 -4.56353896E+00 -2.76606192E+00 
H  -6.57754050E-01 -2.87473308E+00 -2.33302869E+00 
C  -4.35257981E+00 -6.83086527E-01 -9.45776749E-01 
H  -4.36580898E+00 -7.67260773E-01 +1.49629474E-01 
H  -5.34169720E+00 -1.00543744E+00 -1.31447251E+00 
H  -3.58631036E+00 -1.37173362E+00 -1.32302599E+00 
C  -2.83198812E+00 +2.67796562E+00 -4.42777873E+00 
H  -1.74704363E+00 +2.50870518E+00 -4.51885414E+00 
H  -3.31337733E+00 +2.04371299E+00 -5.18753577E+00 
H  -3.03773512E+00 +3.72713126E+00 -4.67976765E+00 
H  -3.51293561E+00 -2.01913363E+00 -5.98173593E+00 
H  -4.57098337E+00 -6.21026441E-02 -5.08321472E+00 
C  -4.42922423E+00 +4.25417206E+00 +8.04538905E-02 
H  -3.49338909E+00 +4.72414506E+00 +4.23725726E-01 
H  -5.03033123E+00 +5.03933333E+00 -4.02687095E-01 
H  -4.97480953E+00 +3.90529965E+00 +9.69027659E-01 
C  +2.61814423E+00 -4.09590529E+00 -6.80242425E+00 
H  +2.51743412E+00 -4.27884680E+00 -7.88254952E+00 
H  +3.49519622E+00 -3.44405382E+00 -6.66036682E+00 
H  +2.83201770E+00 -5.05491009E+00 -6.30963632E+00 
C  +1.54427732E+00 +1.27923723E+00 -1.94895271E+00 
C  +1.64907718E+00 -1.87684694E-01 -2.31565834E+00 
H  +2.00001346E+00 +1.33071528E+00 -7.52713570E-01 
H  +2.09540187E+00 +1.89415128E+00 -2.67037070E+00 
H  +1.66887811E+00 -9.23891918E-01 -1.50484686E+00 
H  +2.38861801E+00 -3.69955715E-01 -3.10515648E+00 
C  +1.83614683E+00 +3.85778511E-02 +1.22068584E+00 
H  +2.63788906E+00 -7.05026324E-01 +1.08921836E+00 
C  +2.32036743E+00 +1.38847409E+00 +7.71039191E-01 
C  +2.71613508E+00 +2.61437564E-01 +4.13198646E+00 
H  +2.32985878E+00 -3.34261741E-02 +5.12456840E+00 
C  +3.11225021E+00 +1.74839653E+00 +4.21732240E+00 
H  +3.35200571E+00 +2.13963960E+00 +3.21827770E+00 
H  +2.26569875E+00 +2.34221678E+00 +4.59687486E+00 
C  +4.31821888E+00 +1.94199669E+00 +5.14026959E+00 
H  +4.60720648E+00 +3.00430306E+00 +5.13546218E+00 
H  +4.02965216E+00 +1.69712322E+00 +6.17921329E+00 
C  +5.49368757E+00 +1.05970253E+00 +4.72269839E+00 
H  +5.81076812E+00 +1.33293979E+00 +3.70125029E+00 
H  +6.35260567E+00 +1.22600211E+00 +5.39112520E+00 
C  +5.08406783E+00 -4.12133287E-01 +4.72985130E+00 
H  +4.80772975E+00 -7.15012473E-01 +5.75704134E+00 
H  +5.92792502E+00 -1.04972242E+00 +4.42572745E+00 
C  +3.90999997E+00 -6.47051881E-01 +3.77864774E+00 
H  +3.60581515E+00 -1.70652506E+00 +3.81001102E+00 
H  +4.23995891E+00 -4.20166183E-01 +2.75197877E+00 
C  +7.43971652E-01 -1.79728671E+00 +3.27979850E+00 
H  +1.50967206E+00 -2.38639371E+00 +2.73995935E+00 
C  +7.54447668E-01 -2.24769110E+00 +4.74967879E+00 
H  +1.74069350E+00 -2.08259767E+00 +5.20801085E+00 
H  +2.78133998E-02 -1.64893530E+00 +5.32559544E+00 
C  +3.94077927E-01 -3.73318394E+00 +4.85834043E+00 
H  +1.19352532E+00 -4.32740568E+00 +4.38043592E+00 
H  +3.74478333E-01 -4.02947107E+00 +5.91859475E+00 
C  -9.41040870E-01 -4.05205426E+00 +4.18499765E+00 
H  -1.75523000E+00 -3.54526638E+00 +4.73446378E+00 
H  -1.14679048E+00 -5.13206654E+00 +4.24452278E+00 
C  -9.49403903E-01 -3.58268080E+00 +2.73041225E+00 
H  -1.92903689E+00 -3.77038188E+00 +2.26569396E+00 
H  -2.10661084E-01 -4.16157621E+00 +2.14823426E+00 
C  -6.15776036E-01 -2.09410155E+00 +2.62436222E+00 
H  -1.39792677E+00 -1.51991426E+00 +3.15064750E+00 
H  -6.31519112E-01 -1.77508153E+00 +1.57164776E+00 
C  +3.35845788E-02 +1.21271543E+00 +3.25998529E+00 
H  +6.28324967E-01 +2.13995118E+00 +3.16873600E+00 
C  -5.80880765E-01 +1.17563469E+00 +4.66681133E+00 
H  -1.17918565E+00 +2.54363017E-01 +4.77737337E+00 
H  +2.01610713E-01 +1.14411683E+00 +5.44236721E+00 
C  -1.48535556E+00 +2.39347875E+00 +4.88318116E+00 
H  -1.94970018E+00 +2.33803957E+00 +5.88001887E+00 
H  -8.61791802E-01 +3.30547407E+00 +4.87516852E+00 
C  -2.55612420E+00 +2.50322621E+00 +3.79501884E+00 
H  -3.16150579E+00 +3.40982180E+00 +3.95106259E+00 
H  -3.24693396E+00 +1.64450472E+00 +3.87967407E+00 
C  -1.93385334E+00 +2.50786440E+00 +2.39822389E+00 
H  -1.32488879E+00 +3.42082665E+00 +2.26797278E+00 
H  -2.71236929E+00 +2.53520441E+00 +1.62288945E+00 
C  -1.05377619E+00 +1.27868545E+00 +2.17577450E+00 
H  -6.10883495E-01 +1.30350836E+00 +1.17282279E+00 
H  -1.68063294E+00 +3.74765136E-01 +2.20077447E+00 
P  +1.31977839E+00 -6.73226300E-02 +2.97217047E+00 
C  +3.72772734E+00 +1.63224993E+00 +8.67405287E-01 
H  +1.68077988E+00 +2.25402370E+00 +9.71351916E-01 
O  +4.02828644E+00 +2.96246194E+00 +7.59165663E-01 
O  +4.62356869E+00 +7.96839330E-01 +9.93990849E-01 
C  +5.41119418E+00 +3.26895176E+00 +7.23148469E-01 
H  +5.92798889E+00 +2.70869883E+00 -6.97653148E-02 
H  +5.90050844E+00 +3.03592892E+00 +1.68281602E+00 
H  +5.47530017E+00 +4.34672927E+00 +5.28044848E-01 
H  +9.58128232E-01 -3.15788434E-01 +6.49012109E-01 
88
(Ru-4)(HDBU)_wB97XD
Ru +2.42508787E-01 +1.63236646E+00 +1.21779599E-01 
Cl -7.67090134E-02 +3.25612910E+00 +1.98872221E+00 
Cl +9.86016827E-01 +1.42650608E-01 -1.65436583E+00 
C  -1.58576661E+00 +1.70831678E+00 -8.59873420E-01 
H  -2.49649580E+00 +1.65298547E+00 -2.55723622E-01 
C  +2.09394576E-01 -6.09122495E-02 +1.27297838E+00 
H  -1.59147888E+00 +1.04358500E+00 -1.73268280E+00 
N  -8.30975142E-01 -9.11531081E-01 +1.49247295E+00 
C  -4.69901646E-01 -2.12028235E+00 +2.23422760E+00 
C  +1.05519718E+00 -2.01649475E+00 +2.30789560E+00 
N  +1.30143752E+00 -6.68196152E-01 +1.80254927E+00 
H  +1.44392999E+00 -2.12498799E+00 +3.33169632E+00 
H  -9.43385448E-01 -2.12181476E+00 +3.23146415E+00 
C  +2.58402490E+00 -5.41988525E-02 +1.94526428E+00 
C  +2.78190163E+00 +8.22069818E-01 +3.02686315E+00 
C  +3.63375368E+00 -3.89630040E-01 +1.07701521E+00 
C  +4.02343684E+00 +1.44347710E+00 +3.15715754E+00 
C  +4.85953688E+00 +2.59344274E-01 +1.24819750E+00 
C  +5.06657362E+00 +1.19285740E+00 +2.26310830E+00 
H  +4.18078742E+00 +2.13842555E+00 +3.98644530E+00 
H  +5.67725886E+00 +2.13551102E-02 +5.62511664E-01 
C  -2.20330844E+00 -6.46315192E-01 +1.22736310E+00 
C  -2.78622996E+00 -1.14363882E+00 +5.29752420E-02 
C  -2.95911301E+00 +4.77718307E-02 +2.18221708E+00 
C  -4.14819212E+00 -9.11876142E-01 -1.61201917E-01 
C  -4.32740300E+00 +2.25373404E-01 +1.94503164E+00 
C  -4.93861229E+00 -2.44505230E-01 +7.76502845E-01 
H  -4.60584357E+00 -1.28110917E+00 -1.08293879E+00 
H  -4.93873248E+00 +7.16508417E-01 +2.71032582E+00 
C  +3.48311425E+00 -1.46078358E+00 +3.19856979E-02 
H  +4.19893354E+00 -1.30840338E+00 -7.87311159E-01 
H  +3.68804405E+00 -2.45187689E+00 +4.73177197E-01 
H  +2.47546899E+00 -1.45621299E+00 -4.02566895E-01 
C  +1.69380884E+00 +1.06162781E+00 +4.03809582E+00 
H  +1.22372161E+00 +1.16035070E-01 +4.35120135E+00 
H  +2.10005077E+00 +1.55450811E+00 +4.93236856E+00 
H  +9.09128627E-01 +1.70701186E+00 +3.61579608E+00 
C  -2.29996774E+00 +6.12128112E-01 +3.41021632E+00 
H  -3.04263446E+00 +1.04046499E+00 +4.09900427E+00 
H  -1.73653343E+00 -1.56787548E-01 +3.95950725E+00 
H  -1.57859072E+00 +1.39680654E+00 +3.12588482E+00 
C  -1.95312617E+00 -1.88235401E+00 -9.54420594E-01 
H  -1.06539380E+00 -1.29418049E+00 -1.24166285E+00 
H  -1.58731906E+00 -2.83469368E+00 -5.37093977E-01 
H  -2.53831412E+00 -2.11442609E+00 -1.85475740E+00 
H  +1.55387548E+00 -2.76356819E+00 +1.67010136E+00 
H  -8.07457120E-01 -3.02180052E+00 +1.70173684E+00 
C  -6.42238747E+00 -7.20228203E-02 +5.58365334E-01 
H  -6.67599301E+00 -8.10332666E-02 -5.11802126E-01 
H  -6.98577574E+00 -8.90440536E-01 +1.03489106E+00 
H  -6.79517057E+00 +8.68768247E-01 +9.93558908E-01 
C  +6.38017320E+00 +1.92039623E+00 +2.39055435E+00 
H  +7.20623898E+00 +1.34181434E+00 +1.95245500E+00 
H  +6.33832191E+00 +2.88841994E+00 +1.86500319E+00 
H  +6.62503799E+00 +2.12782177E+00 +3.44278172E+00 
C  -9.56493874E-01 +3.00579092E+00 -9.56282022E-01 
C  +3.05779922E-01 +3.20083329E+00 -1.52436435E+00 
H  -1.31989394E+00 +3.79070408E+00 -2.90149060E-01 
H  +7.99615315E-01 +4.16178434E+00 -1.35081181E+00 
H  +6.53212353E-01 +2.61687289E+00 -2.37793307E+00 
H  -3.93880426E+00 +2.81230660E+00 +2.57366458E+00 
C  -3.47343110E+00 +3.76773094E+00 +2.30679155E+00 
H  -2.37761144E+00 +3.61534997E+00 +2.38695429E+00 
C  -3.95652883E+00 +4.86464830E+00 +3.26776373E+00 
H  -4.00493303E+00 +4.41280101E+00 +4.26986861E+00 
H  -4.98906646E+00 +5.16099343E+00 +3.01122687E+00 
C  -3.05067637E+00 +6.09259105E+00 +3.33260997E+00 
H  -2.04401144E+00 +5.76928953E+00 +3.64792741E+00 
H  -3.42509547E+00 +6.77493170E+00 +4.11179274E+00 
C  -2.92785885E+00 +6.85230098E+00 +2.01388716E+00 
H  -3.90342167E+00 +7.26979120E+00 +1.70873255E+00 
H  -2.24880176E+00 +7.70694666E+00 +2.15742221E+00 
C  -2.36183532E+00 +6.00458256E+00 +8.78683351E-01 
H  -1.50306439E+00 +5.40115866E+00 +1.22093508E+00 
H  -1.99614422E+00 +6.64773051E+00 +6.87031925E-02 
N  -3.34906030E+00 +5.10559563E+00 +2.48045958E-01 
C  -3.77633889E+00 +4.01293159E+00 +8.63802545E-01 
C  -4.75156552E+00 +3.12056979E+00 -1.20551893E+00 
H  -5.69040985E+00 +2.58419087E+00 -1.39565202E+00 
H  -3.93271636E+00 +2.59094726E+00 -1.71861475E+00 
C  -4.83710257E+00 +4.56998029E+00 -1.65082988E+00 
H  -4.90292347E+00 +4.62811100E+00 -2.74525316E+00 
H  -5.74393869E+00 +5.03590365E+00 -1.23355005E+00 
C  -3.60265584E+00 +5.32195531E+00 -1.18137836E+00 
H  -2.70764298E+00 +5.00007016E+00 -1.73980237E+00 
H  -3.73200228E+00 +6.40287233E+00 -1.33123853E+00 
N  -4.50556803E+00 +3.10136674E+00 +2.28551291E-01 
H  -4.62827648E+00 +2.21602438E+00 +7.17266818E-01 
59
Ru-6A_wB97XD
Ru +3.62536243E-01 +1.56260351E+00 +1.62530288E-02 
Cl +7.16575284E-01 +1.63291051E+00 -2.29193605E+00 
C  -1.47881830E+00 +2.52975764E+00 -8.88300904E-02 
H  -2.33850711E+00 +2.14790375E+00 +4.72586424E-01 
C  +7.81913204E-02 -4.42421808E-01 -1.55047475E-01 
H  -1.69642701E+00 +2.75250271E+00 -1.13983083E+00 
N  -1.04966019E+00 -1.17888973E+00 -1.30474798E-01 
C  -8.12067084E-01 -2.61141606E+00 -3.25837042E-01 
C  +7.13620983E-01 -2.71047735E+00 -2.06457266E-01 
N  +1.11513373E+00 -1.30565709E+00 -2.80612686E-01 
H  +1.03380969E+00 -3.14622669E+00 +7.55958746E-01 
H  -1.34302532E+00 -3.20411193E+00 +4.33169480E-01 
C  +2.46690475E+00 -8.82405984E-01 -9.91197524E-02 
C  +2.90078872E+00 -4.66950091E-01 +1.16902351E+00 
C  +3.33494799E+00 -8.87881342E-01 -1.20498325E+00 
C  +4.22314459E+00 -3.23415950E-02 +1.30767828E+00 
C  +4.64414873E+00 -4.54289941E-01 -1.01533667E+00 
C  +5.10554589E+00 -1.54698983E-02 +2.30165342E-01 
H  +4.56968395E+00 +2.97348066E-01 +2.29072206E+00 
H  +5.32415174E+00 -4.43385301E-01 -1.87117153E+00 
C  -2.36957498E+00 -6.44282596E-01 -3.99318327E-02 
C  -3.05735549E+00 -2.85720760E-01 -1.20736751E+00 
C  -2.93350366E+00 -4.76830451E-01 +1.22865786E+00 
C  -4.34179037E+00 +2.40352786E-01 -1.07152493E+00 
C  -4.22326905E+00 +5.17799864E-02 +1.31852804E+00 
C  -4.94203405E+00 +4.14560063E-01 +1.78855812E-01 
H  -4.88730143E+00 +5.35746488E-01 -1.97185074E+00 
H  -4.67205063E+00 +1.93238253E-01 +2.30525250E+00 
C  +2.84413838E+00 -1.31725920E+00 -2.55968212E+00 
H  +3.62008185E+00 -1.16527138E+00 -3.32161932E+00 
H  +2.56729253E+00 -2.38378131E+00 -2.57210752E+00 
H  +1.95769247E+00 -7.28462886E-01 -2.83964206E+00 
C  +1.98450035E+00 -4.67287236E-01 +2.36848307E+00 
H  +1.21393261E+00 -1.24749702E+00 +2.30609828E+00 
H  +2.55658143E+00 -6.17409663E-01 +3.29454940E+00 
H  +1.45894587E+00 +4.99839453E-01 +2.46668024E+00 
C  -2.13693081E+00 -7.96659179E-01 +2.46568250E+00 
H  -2.75010752E+00 -6.91042589E-01 +3.37065726E+00 
H  -1.73346975E+00 -1.82078718E+00 +2.44380240E+00 
H  -1.27478337E+00 -1.15398579E-01 +2.55491288E+00 
C  -2.40269986E+00 -4.10503507E-01 -2.55525237E+00 
H  -1.49243224E+00 +2.09372835E-01 -2.60262459E+00 
H  -2.10465330E+00 -1.44917927E+00 -2.76850770E+00 
H  -3.08567965E+00 -8.88033366E-02 -3.35280562E+00 
H  +1.16545987E+00 -3.30204734E+00 -1.01449613E+00 
H  -1.17293944E+00 -2.92671379E+00 -1.31819994E+00 
C  -6.33131116E+00 +9.89500130E-01 +2.81033637E-01 
H  -6.38786499E+00 +1.97138835E+00 -2.13408163E-01 
H  -7.06680414E+00 +3.33247729E-01 -2.10132239E-01 
H  -6.63930362E+00 +1.11840732E+00 +1.32788368E+00 
C  +6.52080256E+00 +4.77022418E-01 +3.86035406E-01 
H  +7.24034808E+00 -2.39623068E-01 -3.79452850E-02 
H  +6.65931730E+00 +1.43267790E+00 -1.43854233E-01 
H  +6.77931251E+00 +6.37450005E-01 +1.44190051E+00 
C  -5.50647925E-01 +3.36574673E+00 +6.31598366E-01 
C  +6.46065054E-01 +3.82777291E+00 +7.89486705E-02 
H  -6.37461819E-01 +3.37661392E+00 +1.73087226E+00 
H  +1.38257869E+00 +4.29344547E+00 +7.38723257E-01 
H  +7.26341096E-01 +4.06549620E+00 -9.84323192E-01 
59
Ru-6B_wB97XD
Ru +3.01241114E-01 +1.60899242E+00 +1.79791040E-01 
Cl +2.85158111E-01 +1.61528395E+00 +2.50316446E+00 
C  -1.44985694E+00 +2.45148660E+00 -5.04833317E-01 
H  -2.41738249E+00 +2.18955818E+00 -6.53283651E-02 
C  +8.20006247E-02 -4.29801942E-01 +1.94720348E-01 
H  -1.44440254E+00 +2.38549379E+00 -1.60763781E+00 
N  -1.02465616E+00 -1.19801150E+00 +1.81284850E-01 
C  -7.38854643E-01 -2.63373091E+00 +2.56575147E-01 
C  +7.84466591E-01 -2.67796915E+00 +8.04867164E-02 
N  +1.14489324E+00 -1.26624616E+00 +2.12121612E-01 
H  +1.28349921E+00 -3.28951779E+00 +8.45050172E-01 
H  -1.05760314E+00 -3.03777836E+00 +1.23070813E+00 
C  +2.49233415E+00 -8.01933651E-01 +1.25196817E-01 
C  +3.28357175E+00 -7.88913656E-01 +1.28595538E+00 
C  +2.99383940E+00 -3.66007477E-01 -1.10937424E+00 
C  +4.59566736E+00 -3.31626903E-01 +1.18025570E+00 
C  +4.31477169E+00 +8.58863184E-02 -1.16632672E+00 
C  +5.12868946E+00 +1.10231525E-01 -3.45397612E-02 
H  +5.21934277E+00 -3.08570271E-01 +2.07781904E+00 
H  +4.71524125E+00 +4.30460458E-01 -2.12332105E+00 
C  -2.35660301E+00 -7.04259189E-01 +4.25870345E-02 
C  -2.84746652E+00 -4.69516591E-01 -1.25013324E+00 
C  -3.13332894E+00 -4.63862645E-01 +1.17984824E+00 
C  -4.14276749E+00 +2.37166316E-02 -1.38802264E+00 
C  -4.42710384E+00 +3.43756185E-02 +9.95080984E-01 
C  -4.94728288E+00 +2.85144292E-01 -2.74362031E-01 
H  -4.53290661E+00 +2.20888170E-01 -2.39032488E+00 
H  -5.04190694E+00 +2.38067862E-01 +1.87558471E+00 
C  +2.12704132E+00 -3.41285391E-01 -2.34228416E+00 
H  +2.73943644E+00 -3.17377107E-01 -3.25375059E+00 
H  +1.45444181E+00 -1.20874874E+00 -2.39735768E+00 
H  +1.48754750E+00 +5.59190439E-01 -2.35310301E+00 
C  +2.70829462E+00 -1.21416290E+00 +2.60890598E+00 
H  +1.84790699E+00 -5.76953441E-01 +2.86782052E+00 
H  +2.35936628E+00 -2.25856722E+00 +2.58587644E+00 
H  +3.45834409E+00 -1.12828774E+00 +3.40631420E+00 
C  -2.57861212E+00 -6.96490934E-01 +2.55802992E+00 
H  -3.32323865E+00 -4.47689617E-01 +3.32601113E+00 
H  -2.28694045E+00 -1.74876633E+00 +2.70338707E+00 
H  -1.68403783E+00 -7.57926112E-02 +2.72441252E+00 
C  -1.96990804E+00 -6.97638444E-01 -2.45180046E+00 
H  -1.10381900E+00 -1.72864474E-02 -2.43045082E+00 
H  -1.57098741E+00 -1.72390128E+00 -2.48035696E+00 
H  -2.52253041E+00 -5.22476005E-01 -3.38453217E+00 
H  +1.08660519E+00 -3.05992688E+00 -9.09993459E-01 
H  -1.27810679E+00 -3.17969951E+00 -5.31123335E-01 
C  -6.34079344E+00 +8.29954425E-01 -4.55187441E-01 
H  -6.32114222E+00 +1.78894085E+00 -9.95775566E-01 
H  -6.96341272E+00 +1.36437991E-01 -1.04180570E+00 
H  -6.83710268E+00 +9.96362647E-01 +5.10758335E-01 
C  +6.54666107E+00 +6.15293832E-01 -1.02640163E-01 
H  +6.85206099E+00 +8.24977695E-01 -1.13705882E+00 
H  +6.65690297E+00 +1.54507374E+00 +4.77258733E-01 
H  +7.24990706E+00 -1.18714458E-01 +3.19413293E-01 
C  -6.73023115E-01 +3.50029804E+00 +1.11862619E-01 
C  +6.28764773E-01 +3.73008747E+00 -3.48462852E-01 
H  -9.70985466E-01 +3.87925587E+00 +1.09405368E+00 
H  +1.30285695E+00 +4.38322969E+00 +2.10392102E-01 
H  +8.56007696E-01 +3.63262273E+00 -1.42113969E+00 
29
(HDBU)(Cl)_wB97XD
H  -2.02566693E+00 -1.09925990E+00 +1.20463983E+00 
C  -9.75128449E-01 -1.17943708E+00 +8.89161511E-01 
H  -8.08421274E-01 -2.20138210E+00 +5.09908341E-01 
C  -5.90301627E-02 -8.88962240E-01 +2.08863982E+00 
H  -5.08913832E-01 -1.36954497E+00 +2.96966655E+00 
H  -8.02199464E-02 +1.94154660E-01 +2.29529693E+00 
C  +1.37855956E+00 -1.38711863E+00 +1.93827274E+00 
H  +1.36051985E+00 -2.48674162E+00 +1.82704604E+00 
H  +1.93041888E+00 -1.18383507E+00 +2.86952148E+00 
C  +2.15630265E+00 -7.96811077E-01 +7.61208872E-01 
H  +2.30364577E+00 +2.88615293E-01 +8.98104128E-01 
H  +3.16020566E+00 -1.25015215E+00 +7.32847587E-01 
C  +1.48855843E+00 -1.02902606E+00 -5.95439261E-01 
H  +1.13167908E+00 -2.06832040E+00 -6.76030529E-01 
H  +2.21574923E+00 -8.91692902E-01 -1.40703639E+00 
N  +3.86742845E-01 -1.08309110E-01 -8.76596016E-01 
C  -7.92021099E-01 -1.94651325E-01 -2.32849488E-01 
C  -1.72465439E+00 +1.64453533E+00 -1.50107026E+00 
H  -2.41529940E+00 +2.43465494E+00 -1.17697628E+00 
H  -2.08001516E+00 +1.27287625E+00 -2.47694553E+00 
C  -2.92489968E-01 +2.14625916E+00 -1.60224529E+00 
H  -1.85259292E-01 +2.87120911E+00 -2.42073188E+00 
H  -1.75834620E-02 +2.65408489E+00 -6.64225452E-01 
C  +6.39983624E-01 +9.67225439E-01 -1.83800755E+00 
H  +5.24633729E-01 +5.76553856E-01 -2.86427348E+00 
H  +1.68744082E+00 +1.28243915E+00 -1.72089960E+00 
N  -1.80021275E+00 +5.83140374E-01 -5.17566030E-01 
H  -2.67492039E+00 +5.75128818E-01 +1.75181068E-01 
Cl -3.92530364E+00 +6.41367381E-01 +1.41129814E+00 
59
TS-7_wB97XD
Ru +5.61864428E-01 +1.42025665E+00 +1.55354063E-01 
Cl +7.24391109E-01 +1.84974286E+00 -2.14255605E+00 
C  -1.22317297E+00 +2.48153592E+00 +3.36727399E-01 
H  -2.07163733E+00 +2.05156763E+00 +8.80248819E-01 
C  +1.08892042E-01 -4.95471703E-01 -2.70049447E-01 
H  -1.48570701E+00 +2.88684300E+00 -6.47167870E-01 
N  -1.03035648E+00 -1.20559796E+00 -3.34701884E-01 
C  -8.05321259E-01 -2.61857313E+00 -6.56143524E-01 
C  +7.14951747E-01 -2.75969449E+00 -4.86690884E-01 
N  +1.13634598E+00 -1.36025411E+00 -4.55273821E-01 
H  +9.87476483E-01 -3.26253423E+00 +4.57788000E-01 
H  -1.37567988E+00 -3.27049444E+00 +2.09209273E-02 
C  +2.46708503E+00 -9.14143214E-01 -1.96795986E-01 
C  +2.81411688E+00 -4.63570631E-01 +1.08888380E+00 
C  +3.38676012E+00 -8.67495319E-01 -1.25883177E+00 
C  +4.11094327E+00 +2.00483118E-02 +1.29529905E+00 
C  +4.66885162E+00 -3.92388207E-01 -1.00028053E+00 
C  +5.05035603E+00 +5.80479599E-02 +2.68352897E-01 
H  +4.38888683E+00 +3.74696819E-01 +2.29107238E+00 
H  +5.38831448E+00 -3.45007828E-01 -1.82193982E+00 
C  -2.33980019E+00 -6.50084873E-01 -2.11126384E-01 
C  -2.99707510E+00 -1.58014378E-01 -1.34713664E+00 
C  -2.92253727E+00 -5.95219217E-01 +1.05889655E+00 
C  -4.26962729E+00 +3.87287857E-01 -1.17862408E+00 
C  -4.20054429E+00 -4.53270833E-02 +1.18103848E+00 
C  -4.88802587E+00 +4.51224397E-01 +7.32386980E-02 
H  -4.79147750E+00 +7.84557638E-01 -2.05342304E+00 
H  -4.66383820E+00 +7.34444290E-03 +2.16979480E+00 
C  +2.95808191E+00 -1.25087978E+00 -2.64779787E+00 
H  +3.76833068E+00 -1.07908128E+00 -3.36856268E+00 
H  +2.66892743E+00 -2.31160694E+00 -2.71353015E+00 
H  +2.09003904E+00 -6.41220367E-01 -2.94420430E+00 
C  +1.82922972E+00 -4.74305091E-01 +2.23450147E+00 
H  +1.21865733E+00 +4.56143705E-01 +2.26888462E+00 
H  +1.12599247E+00 -1.31545562E+00 +2.17739309E+00 
H  +2.35340146E+00 -5.18502009E-01 +3.19903826E+00 
C  -2.15621834E+00 -1.04998899E+00 +2.27212121E+00 
H  -2.79603670E+00 -1.06088676E+00 +3.16469706E+00 
H  -1.73271737E+00 -2.05765462E+00 +2.14185826E+00 
H  -1.31201518E+00 -3.67435752E-01 +2.46410344E+00 
C  -2.32590191E+00 -1.71624899E-01 -2.69256780E+00 
H  -1.41210698E+00 +4.44736209E-01 -2.67405417E+00 
H  -2.03180045E+00 -1.19036429E+00 -2.99051438E+00 
H  -2.99658451E+00 +2.22935242E-01 -3.46754644E+00 
H  +1.18285594E+00 -3.30997890E+00 -1.31440108E+00 
H  -1.12770235E+00 -2.83179946E+00 -1.68827474E+00 
C  -6.26119699E+00 +1.05639140E+00 +2.12101408E-01 
H  -6.61217743E+00 +1.02760704E+00 +1.25295942E+00 
H  -6.26135236E+00 +2.10714282E+00 -1.16842024E-01 
H  -6.99480223E+00 +5.19360360E-01 -4.09012863E-01 
C  +6.43816232E+00 +5.97329890E-01 +4.97163678E-01 
H  +7.20265310E+00 -1.08547744E-01 +1.38754770E-01 
H  +6.58168137E+00 +1.54230106E+00 -4.99879899E-02 
H  +6.62558189E+00 +7.93053492E-01 +1.56193070E+00 
C  -2.11360300E-01 +3.14336283E+00 +1.12127177E+00 
C  +9.74520094E-01 +3.63669094E+00 +5.70376538E-01 
H  -2.42484766E-01 +2.99642215E+00 +2.21265669E+00 
H  +1.76886990E+00 +3.96672667E+00 +1.24465347E+00 
H  +1.00373781E+00 +4.03284601E+00 -4.47443514E-01 
59
Ru-8_wB97XD
Ru +7.54412152E-01 +1.18031493E+00 +3.03751652E-01 
Cl +7.45173909E-01 +1.93603332E+00 -1.96907668E+00 
C  -8.94861755E-01 +2.42862014E+00 +7.03424902E-01 
H  -1.75714744E+00 +2.05303582E+00 +1.26442098E+00 
C  +6.95144017E-02 -6.15381846E-01 -2.76334929E-01 
H  -1.15603632E+00 +2.92619823E+00 -2.36107612E-01 
N  -1.07836437E+00 -1.29751076E+00 -3.51730882E-01 
C  -8.67870512E-01 -2.70298670E+00 -7.21881606E-01 
C  +6.56020441E-01 -2.87377182E+00 -5.60986487E-01 
N  +1.08783551E+00 -1.47909138E+00 -4.87501394E-01 
H  +9.22292770E-01 -3.41025286E+00 +3.65471271E-01 
H  -1.44416180E+00 -3.37089721E+00 -6.62044722E-02 
C  +2.38595389E+00 -9.39088023E-01 -2.47992185E-01 
C  +2.62072558E+00 -2.16744529E-01 +9.49823874E-01 
C  +3.37011365E+00 -1.01400807E+00 -1.25267997E+00 
C  +3.87132099E+00 +4.14051062E-01 +1.10781518E+00 
C  +4.59152863E+00 -3.94861967E-01 -1.02969603E+00 
C  +4.86042438E+00 +3.30840115E-01 +1.41794448E-01 
H  +4.05332956E+00 +9.81807997E-01 +2.02303632E+00 
H  +5.35298350E+00 -4.38694813E-01 -1.81278516E+00 
C  -2.36990805E+00 -6.98097668E-01 -2.34562707E-01 
C  -2.96993366E+00 -1.25647188E-01 -1.36511574E+00 
C  -2.98398007E+00 -6.70696072E-01 +1.02116409E+00 
C  -4.22382917E+00 +4.63946960E-01 -1.20790726E+00 
C  -4.24139569E+00 -7.25986605E-02 +1.13162944E+00 
C  -4.87582984E+00 +4.98028911E-01 +2.80951806E-02 
H  -4.70236913E+00 +9.21676525E-01 -2.07781791E+00 
H  -4.73092679E+00 -4.26224402E-02 +2.10862684E+00 
C  +3.06170085E+00 -1.68164257E+00 -2.56417683E+00 
H  +3.83642297E+00 -1.45475549E+00 -3.30810362E+00 
H  +3.00452804E+00 -2.77814784E+00 -2.46807721E+00 
H  +2.09600139E+00 -1.32085906E+00 -2.94998658E+00 
C  +1.59839682E+00 -1.34388153E-01 +2.04595149E+00 
H  +5.69540289E-01 +4.56829856E-01 +1.90494646E+00 
H  +1.17613962E+00 -1.12203968E+00 +2.29012367E+00 
H  +2.02758084E+00 +3.08752600E-01 +2.95361846E+00 
C  -2.27578634E+00 -1.20898168E+00 +2.23572291E+00 
H  -2.95780135E+00 -1.27944873E+00 +3.09371547E+00 
H  -1.84318877E+00 -2.20509134E+00 +2.05867549E+00 
H  -1.44596578E+00 -5.39268015E-01 +2.51458075E+00 
C  -2.25478282E+00 -9.99453395E-02 -2.68761097E+00 
H  -1.34311623E+00 +5.17697782E-01 -2.61789674E+00 
H  -1.94906931E+00 -1.10867318E+00 -3.00685340E+00 
H  -2.89917741E+00 +3.19290444E-01 -3.47184198E+00 
H  +1.10653156E+00 -3.40392282E+00 -1.41023911E+00 
H  -1.19380570E+00 -2.87752657E+00 -1.76003750E+00 
C  -6.22934141E+00 +1.14849442E+00 +1.54679724E-01 
H  -6.59766622E+00 +1.11729812E+00 +1.18946049E+00 
H  -6.18889888E+00 +2.20273723E+00 -1.59850709E-01 
H  -6.97085024E+00 +6.44849474E-01 -4.84970705E-01 
C  +6.18343068E+00 +1.03015868E+00 +3.11310046E-01 
H  +7.02330139E+00 +3.35311216E-01 +1.58453897E-01 
H  +6.28900484E+00 +1.84178074E+00 -4.25584208E-01 
H  +6.28192442E+00 +1.47042080E+00 +1.31305511E+00 
C  +2.24039512E-01 +2.92158649E+00 +1.46573492E+00 
C  +1.42628867E+00 +3.30414162E+00 +8.68821260E-01 
H  +2.23310380E-01 +2.74821315E+00 +2.55050050E+00 
H  +2.28763417E+00 +3.50450433E+00 +1.51185296E+00 
H  +1.44885923E+00 +3.74442152E+00 -1.29947214E-01 
59
TS-9_wB97XD
Ru +6.98228836E-01 +1.18650451E+00 +3.51760653E-01 
Cl +8.23197804E-01 +1.96861232E+00 -1.94259806E+00 
C  -9.37365794E-01 +2.46875325E+00 +6.95878487E-01 
H  -1.83255806E+00 +2.10339930E+00 +1.20814968E+00 
C  +6.85769012E-02 -6.17434742E-01 -2.71763299E-01 
H  -1.13671469E+00 +2.97505556E+00 -2.53851324E-01 
N  -1.07389565E+00 -1.30802372E+00 -3.36669064E-01 
C  -8.55427661E-01 -2.70716414E+00 -7.23373594E-01 
C  +6.66122960E-01 -2.86856388E+00 -5.48720027E-01 
N  +1.09368439E+00 -1.47063328E+00 -4.91995976E-01 
H  +9.26664412E-01 -3.38669020E+00 +3.89671226E-01 
H  -1.43406810E+00 -3.38746337E+00 -8.32755912E-02 
C  +2.39814559E+00 -9.41522173E-01 -2.60605106E-01 
C  +2.63342875E+00 -1.80121990E-01 +9.11641358E-01 
C  +3.38599858E+00 -1.06424003E+00 -1.25545294E+00 
C  +3.88054251E+00 +4.62484063E-01 +1.04418980E+00 
C  +4.61001451E+00 -4.42686229E-01 -1.04938183E+00 
C  +4.87660691E+00 +3.32096004E-01 +9.04193303E-02 
H  +4.05526906E+00 +1.07202686E+00 +1.93364711E+00 
H  +5.37556632E+00 -5.22954028E-01 -1.82574806E+00 
C  -2.36601739E+00 -7.08162547E-01 -2.23048369E-01 
C  -2.94015500E+00 -9.11874977E-02 -1.34346686E+00 
C  -3.00222887E+00 -7.20884739E-01 +1.02195190E+00 
C  -4.19029498E+00 +5.06758737E-01 -1.18679220E+00 
C  -4.25510764E+00 -1.13172510E-01 +1.13150438E+00 
C  -4.86327881E+00 +5.04548926E-01 +3.83066999E-02 
H  -4.64908710E+00 +9.99291961E-01 -2.04829013E+00 
H  -4.76219485E+00 -1.13561376E-01 +2.09994799E+00 
C  +3.08695358E+00 -1.78092849E+00 -2.54346834E+00 
H  +3.85454835E+00 -1.56232574E+00 -3.29722151E+00 
H  +3.05460912E+00 -2.87476918E+00 -2.41123871E+00 
H  +2.11318247E+00 -1.45471158E+00 -2.93915449E+00 
C  +1.57245528E+00 +8.74449370E-03 +1.94754671E+00 
H  +2.67439702E-01 +5.32710973E-01 +1.76956697E+00 
H  +1.13760301E+00 -9.52782008E-01 +2.26741961E+00 
H  +1.95221977E+00 +5.40852869E-01 +2.82955809E+00 
C  -2.32426362E+00 -1.31850552E+00 +2.22614129E+00 
H  -3.00903038E+00 -1.36397823E+00 +3.08357584E+00 
H  -1.95289447E+00 -2.33623036E+00 +2.03240736E+00 
H  -1.45534345E+00 -7.05711050E-01 +2.51571717E+00 
C  -2.20417559E+00 -3.12288001E-02 -2.65336536E+00 
H  -1.29798904E+00 +5.91471579E-01 -2.55914444E+00 
H  -1.88446054E+00 -1.03067283E+00 -2.98757106E+00 
H  -2.83983792E+00 +3.98525318E-01 -3.43900201E+00 
H  +1.12572091E+00 -3.41043827E+00 -1.38501796E+00 
H  -1.16972593E+00 -2.86717685E+00 -1.76771492E+00 
C  -6.21319984E+00 +1.16263993E+00 +1.64035667E-01 
H  -6.58558878E+00 +1.12715050E+00 +1.19721844E+00 
H  -6.16612302E+00 +2.21822137E+00 -1.44602849E-01 
H  -6.95525486E+00 +6.66397638E-01 -4.80933230E-01 
C  +6.20346872E+00 +1.02922083E+00 +2.37906605E-01 
H  +7.03837567E+00 +3.16406576E-01 +1.56283620E-01 
H  +6.33529149E+00 +1.78311117E+00 -5.53840808E-01 
H  +6.28463413E+00 +1.54037962E+00 +1.20695146E+00 
C  +1.56397199E-01 +2.93584248E+00 +1.51226968E+00 
C  +1.38223243E+00 +3.29497531E+00 +9.55881487E-01 
H  +1.08234438E-01 +2.76194410E+00 +2.59431829E+00 
H  +2.23027988E+00 +3.46572420E+00 +1.62467927E+00 
H  +1.44798837E+00 +3.73357490E+00 -4.15380715E-02 
59
Ru-10_wB97XD
Ru +6.12244553E-01 +1.19024665E+00 +4.13008120E-01 
Cl +1.05869599E+00 +1.92107880E+00 -1.89721992E+00 
C  -8.88982358E-01 +2.65749343E+00 +5.92059549E-01 
H  -1.87390488E+00 +2.39948612E+00 +9.89618616E-01 
C  +6.23829655E-02 -6.27337194E-01 -2.42772979E-01 
H  -9.08475419E-01 +3.16931018E+00 -3.75413902E-01 
N  -1.07169447E+00 -1.33251821E+00 -3.00060129E-01 
C  -8.34626182E-01 -2.72352129E+00 -7.00511025E-01 
C  +6.83881941E-01 -2.86496656E+00 -5.04674668E-01 
N  +1.09892029E+00 -1.46150683E+00 -4.70559149E-01 
H  +9.36716296E-01 -3.35715764E+00 +4.49425244E-01 
H  -1.41263778E+00 -3.41992946E+00 -7.82088109E-02 
C  +2.40718123E+00 -9.35904339E-01 -2.53343518E-01 
C  +2.64408354E+00 -1.31185410E-01 +8.88138194E-01 
C  +3.38719376E+00 -1.09859920E+00 -1.24906618E+00 
C  +3.89258276E+00 +5.19212589E-01 +9.81660617E-01 
C  +4.61121454E+00 -4.66790053E-01 -1.07563563E+00 
C  +4.88499131E+00 +3.52099098E-01 +3.10109900E-02 
H  +4.07140575E+00 +1.16254436E+00 +1.84624418E+00 
H  +5.37079888E+00 -5.74765396E-01 -1.85470784E+00 
C  -2.36724531E+00 -7.40137635E-01 -1.91793711E-01 
C  -2.90232135E+00 -4.99239135E-02 -1.28866571E+00 
C  -3.04232058E+00 -8.28851365E-01 +1.03016718E+00 
C  -4.15290251E+00 +5.47886515E-01 -1.13258328E+00 
C  -4.29351614E+00 -2.17752143E-01 +1.13892981E+00 
C  -4.86323043E+00 +4.73761966E-01 +6.89241942E-02 
H  -4.58258215E+00 +1.09592849E+00 -1.97540914E+00 
H  -4.83045866E+00 -2.74830133E-01 +2.08940156E+00 
C  +3.08506657E+00 -1.85691172E+00 -2.51267294E+00 
H  +3.83783861E+00 -1.64261215E+00 -3.28248913E+00 
H  +3.07861183E+00 -2.94736725E+00 -2.35175066E+00 
H  +2.10037842E+00 -1.56102831E+00 -2.90490470E+00 
C  +1.58636097E+00 +1.26919882E-01 +1.90370423E+00 
H  -3.90523031E-01 +6.96580934E-01 +1.49470699E+00 
H  +1.08723005E+00 -7.88656742E-01 +2.25231784E+00 
H  +1.96171740E+00 +6.99467280E-01 +2.76192873E+00 
C  -2.41182684E+00 -1.52610008E+00 +2.20664732E+00 
H  -3.06858058E+00 -1.48616797E+00 +3.08592450E+00 
H  -2.20226563E+00 -2.58608279E+00 +1.99280127E+00 
H  -1.45369771E+00 -1.05078051E+00 +2.46960981E+00 
C  -2.13107705E+00 +7.70573021E-02 -2.57370728E+00 
H  -1.23349544E+00 +7.03314900E-01 -2.43473989E+00 
H  -1.78803085E+00 -9.03450218E-01 -2.93910592E+00 
H  -2.75144703E+00 +5.30903315E-01 -3.35799939E+00 
H  +1.16013385E+00 -3.41958819E+00 -1.32233202E+00 
H  -1.13160356E+00 -2.87133526E+00 -1.75214833E+00 
C  -6.21669761E+00 +1.12501439E+00 +1.93267079E-01 
H  -6.57775021E+00 +1.11130473E+00 +1.23103438E+00 
H  -6.18418979E+00 +2.17225464E+00 -1.43233288E-01 
H  -6.96145933E+00 +6.04454616E-01 -4.29589136E-01 
C  +6.21430917E+00 +1.05065622E+00 +1.44884615E-01 
H  +7.04522538E+00 +3.28406749E-01 +1.32272149E-01 
H  +6.36434449E+00 +1.74022717E+00 -7.00299288E-01 
H  +6.28399857E+00 +1.63381719E+00 +1.07328560E+00 
C  +1.56181100E-01 +3.00551411E+00 +1.52598499E+00 
C  +1.44522512E+00 +3.22759927E+00 +1.05819968E+00 
H  -7.32849710E-03 +2.84393555E+00 +2.59562192E+00 
H  +2.26576736E+00 +3.28744775E+00 +1.77816843E+00 
H  +1.62758870E+00 +3.64523377E+00 +6.63497949E-02 
59
TS-11_wB97XD
Ru +7.77186925E-01 +1.14224574E+00 +2.25352506E-01 
Cl +5.86012158E-01 +1.88053003E+00 -2.16295830E+00 
C  -3.82459910E-01 +2.88821642E+00 +8.02285264E-01 
H  -1.20709705E+00 +2.90426595E+00 +1.52118997E+00 
C  +3.34012190E-03 -6.18548739E-01 -3.27270299E-01 
H  -6.18267017E-01 +3.36251959E+00 -1.55733230E-01 
N  -1.11908085E+00 -1.33748040E+00 -3.20484775E-01 
C  -8.49296436E-01 -2.73875437E+00 -6.82614357E-01 
C  +6.82006991E-01 -2.83364067E+00 -5.38798331E-01 
N  +1.04424721E+00 -1.41747544E+00 -5.99762143E-01 
H  +9.84535864E-01 -3.26479838E+00 +4.30734512E-01 
H  -1.38765444E+00 -3.42332177E+00 -1.33607930E-02 
C  +2.29255943E+00 -7.78533465E-01 -2.89246378E-01 
C  +2.49511625E+00 -2.29175050E-01 +1.01318546E+00 
C  +3.31113577E+00 -7.50553474E-01 -1.27964452E+00 
C  +3.78927980E+00 +3.03751367E-01 +1.28343470E+00 
C  +4.53761031E+00 -2.20697823E-01 -9.44262821E-01 
C  +4.79846660E+00 +2.97781605E-01 +3.47656031E-01 
H  +3.96986546E+00 +7.18555505E-01 +2.27811806E+00 
H  +5.32446339E+00 -1.80797472E-01 -1.70165322E+00 
C  -2.43391011E+00 -7.91757198E-01 -1.93577202E-01 
C  -3.07513932E+00 -2.74849529E-01 -1.32991377E+00 
C  -3.03474426E+00 -7.72621837E-01 +1.06977081E+00 
C  -4.35702191E+00 +2.50255797E-01 -1.16946621E+00 
C  -4.32089683E+00 -2.38100612E-01 +1.18094476E+00 
C  -4.99680261E+00 +2.74047430E-01 +7.33927529E-02 
H  -4.86945043E+00 +6.61531176E-01 -2.04322760E+00 
H  -4.80213361E+00 -2.16403230E-01 +2.16221381E+00 
C  +2.99449513E+00 -1.22054221E+00 -2.67038936E+00 
H  +3.85979135E+00 -1.09256918E+00 -3.33402655E+00 
H  +2.70177298E+00 -2.28197094E+00 -2.69421208E+00 
H  +2.15402198E+00 -6.27665637E-01 -3.06600041E+00 
C  +1.36251638E+00 -2.71724584E-02 +1.91571517E+00 
H  -6.81471305E-01 +1.22315987E+00 +8.17751610E-01 
H  +7.18440610E-01 -8.98435649E-01 +2.09100327E+00 
H  +1.63440054E+00 +4.54777830E-01 +2.86337701E+00 
C  -2.29384858E+00 -1.26432872E+00 +2.28474934E+00 
H  -2.96278415E+00 -1.33497031E+00 +3.15283371E+00 
H  -1.84065216E+00 -2.25358652E+00 +2.12059824E+00 
H  -1.47368096E+00 -5.73335471E-01 +2.53662807E+00 
C  -2.38112645E+00 -2.46902472E-01 -2.66384196E+00 
H  -1.48989258E+00 +4.03214782E-01 -2.62473043E+00 
H  -2.04597692E+00 -1.25026849E+00 -2.97011331E+00 
H  -3.05321348E+00 +1.34049229E-01 -3.44423007E+00 
H  +1.14563903E+00 -3.41599996E+00 -1.34577175E+00 
H  -1.17690543E+00 -2.93379443E+00 -1.71661715E+00 
C  -6.38536815E+00 +8.45627972E-01 +2.01342690E-01 
H  -6.72638119E+00 +8.49592601E-01 +1.24586730E+00 
H  -6.42136961E+00 +1.88023404E+00 -1.72868313E-01 
H  -7.10765999E+00 +2.59902114E-01 -3.88647059E-01 
C  +6.16096260E+00 +8.58843054E-01 +6.57904497E-01 
H  +6.94480604E+00 +1.02428109E-01 +4.96777728E-01 
H  +6.38986078E+00 +1.71041085E+00 -2.04724790E-03 
H  +6.22903094E+00 +1.20569750E+00 +1.69815733E+00 
C  +9.48790354E-01 +3.01459283E+00 +1.33644755E+00 
C  +2.03875505E+00 +3.01256247E+00 +4.70225169E-01 
H  +1.10238989E+00 +2.88762342E+00 +2.41163368E+00 
H  +3.04285130E+00 +2.93471113E+00 +8.92568839E-01 
H  +1.95723451E+00 +3.40112347E+00 -5.46490210E-01 
59
Ru-12_wB97XD
Ru +9.12508787E-01 +1.11576269E+00 +1.24960669E-01 
Cl +4.37129756E-01 +1.89029442E+00 -2.18885713E+00 
C  -1.40971777E-01 +3.04995893E+00 +9.57735317E-01 
H  -7.28797618E-01 +3.22490050E+00 +1.86756118E+00 
C  -4.61448512E-02 -6.06740849E-01 -3.49532619E-01 
H  -3.96422353E-01 +3.76190327E+00 +1.62928353E-01 
N  -1.15227083E+00 -1.34685940E+00 -2.98434021E-01 
C  -8.54681552E-01 -2.75340706E+00 -6.32146730E-01 
C  +6.83044291E-01 -2.81108718E+00 -5.23338291E-01 
N  +1.00243826E+00 -1.38726255E+00 -6.38806656E-01 
H  +1.01841462E+00 -3.20288055E+00 +4.52268868E-01 
H  -1.36267540E+00 -3.43164580E+00 +6.66904808E-02 
C  +2.19410547E+00 -6.35380345E-01 -3.27631833E-01 
C  +2.41280240E+00 -1.96767349E-01 +1.03491343E+00 
C  +3.26033018E+00 -5.82578051E-01 -1.29652044E+00 
C  +3.73668578E+00 +2.61720861E-01 +1.36991482E+00 
C  +4.48146458E+00 -1.15532979E-01 -9.01742744E-01 
C  +4.74319658E+00 +2.91028175E-01 +4.47751303E-01 
H  +3.92406010E+00 +5.68004145E-01 +2.40180690E+00 
H  +5.28802090E+00 -4.54960970E-02 -1.63599652E+00 
C  -2.48056061E+00 -8.30310381E-01 -1.84241627E-01 
C  -3.13759176E+00 -3.71983663E-01 -1.33737029E+00 
C  -3.08555476E+00 -7.90495560E-01 +1.07653092E+00 
C  -4.43608359E+00 +1.16288368E-01 -1.19553598E+00 
C  -4.38896592E+00 -2.95096186E-01 +1.16866398E+00 
C  -5.07926817E+00 +1.58830053E-01 +4.49812329E-02 
H  -4.95989920E+00 +4.81454664E-01 -2.08293326E+00 
H  -4.87310634E+00 -2.58834817E-01 +2.14810735E+00 
C  +2.95958102E+00 -9.85273254E-01 -2.70978581E+00 
H  +3.83796457E+00 -8.48497671E-01 -3.35441543E+00 
H  +2.64482058E+00 -2.03893152E+00 -2.77634916E+00 
H  +2.13307889E+00 -3.64269066E-01 -3.09144076E+00 
C  +1.27104381E+00 -6.43495355E-02 +1.90127021E+00 
H  -6.34040889E-01 +2.03671814E+00 +5.89659620E-01 
H  +5.78642904E-01 -9.07613691E-01 +1.99066547E+00 
H  +1.46817615E+00 +4.12766108E-01 +2.86830092E+00 
C  -2.33666369E+00 -1.22137151E+00 +2.30969135E+00 
H  -3.01477593E+00 -1.32110991E+00 +3.16783717E+00 
H  -1.82164673E+00 -2.18298018E+00 +2.16613512E+00 
H  -1.56449086E+00 -4.79255280E-01 +2.56700886E+00 
C  -2.44542166E+00 -3.68393929E-01 -2.67301178E+00 
H  -1.56950184E+00 +3.02589437E-01 -2.65500052E+00 
H  -2.08823134E+00 -1.37259419E+00 -2.95005100E+00 
H  -3.12695680E+00 -2.62301803E-02 -3.46311213E+00 
H  +1.14076253E+00 -3.40799214E+00 -1.32306931E+00 
H  -1.20098190E+00 -2.98226068E+00 -1.65297501E+00 
C  -6.48654327E+00 +6.87169700E-01 +1.52814251E-01 
H  -6.83040794E+00 +7.11848394E-01 +1.19612635E+00 
H  -6.55627315E+00 +1.70796296E+00 -2.53240610E-01 
H  -7.18719782E+00 +5.96406856E-02 -4.20029960E-01 
C  +6.12844224E+00 +7.58569891E-01 +8.04187174E-01 
H  +6.87511969E+00 -2.08832947E-02 +5.84512781E-01 
H  +6.40316730E+00 +1.64509397E+00 +2.10395320E-01 
H  +6.20790087E+00 +1.02103411E+00 +1.86807132E+00 
C  +1.31633554E+00 +2.89903141E+00 +1.21812624E+00 
C  +2.24247024E+00 +2.93881211E+00 +1.83621182E-01 
H  +1.64033453E+00 +2.74266731E+00 +2.25062359E+00 
H  +3.29824376E+00 +2.79317173E+00 +4.20491640E-01 
H  +2.00804223E+00 +3.39514280E+00 -7.78883773E-01 
59
TS-13_wB97XD
Ru +9.01227385E-01 +1.12092016E+00 +5.03162414E-02 
Cl -5.40758857E-02 +2.14366114E+00 -1.93222442E+00 
C  +2.42387130E-01 +3.50030082E+00 +1.24814702E+00 
H  +9.07856600E-02 +3.97920957E+00 +2.22633067E+00 
C  -9.02292131E-02 -5.99173432E-01 -3.96285583E-01 
H  +3.50483834E-02 +4.21331470E+00 +4.39381639E-01 
N  -1.18098242E+00 -1.36065409E+00 -3.28339047E-01 
C  -8.54544740E-01 -2.77122426E+00 -6.17801191E-01 
C  +6.82073686E-01 -2.79666972E+00 -4.99827667E-01 
N  +9.73120803E-01 -1.37194372E+00 -6.72714236E-01 
H  +1.01903943E+00 -3.14092983E+00 +4.93129293E-01 
H  -1.35481344E+00 -3.43647610E+00 +9.88187586E-02 
C  +2.13510657E+00 -5.74202521E-01 -3.53402619E-01 
C  +2.34849339E+00 -1.54154688E-01 +1.02389536E+00 
C  +3.23593399E+00 -5.41717709E-01 -1.29746042E+00 
C  +3.68303377E+00 +2.62520745E-01 +1.39507609E+00 
C  +4.45585320E+00 -1.16524333E-01 -8.69162689E-01 
C  +4.70647502E+00 +2.67110226E-01 +4.97848707E-01 
H  +3.86055998E+00 +5.38911527E-01 +2.43707411E+00 
H  +5.28189651E+00 -6.27582188E-02 -1.58340820E+00 
C  -2.52646403E+00 -8.86328512E-01 -2.22184549E-01 
C  -3.20156888E+00 -4.83248207E-01 -1.38495711E+00 
C  -3.13616313E+00 -8.49566504E-01 +1.03619630E+00 
C  -4.52025548E+00 -4.97977309E-02 -1.25559905E+00 
C  -4.46010186E+00 -4.09939797E-01 +1.11602937E+00 
C  -5.16667463E+00 -7.88443530E-03 -1.69840642E-02 
H  -5.05793124E+00 +2.72429802E-01 -2.15124844E+00 
H  -4.94800452E+00 -3.76566240E-01 +2.09368804E+00 
C  +2.95611360E+00 -9.27309757E-01 -2.71987919E+00 
H  +3.84506748E+00 -7.90699778E-01 -3.34994624E+00 
H  +2.63426750E+00 -1.97773294E+00 -2.80114964E+00 
H  +2.13809535E+00 -3.04033413E-01 -3.11526185E+00 
C  +1.19200307E+00 -1.56571780E-02 +1.85734462E+00 
H  -5.48002513E-01 +2.71070025E+00 +1.17742372E+00 
H  +4.81072287E-01 -8.43506855E-01 +1.93388742E+00 
H  +1.35143111E+00 +4.89100775E-01 +2.81687158E+00 
C  -2.37634842E+00 -1.22539262E+00 +2.28065402E+00 
H  -3.05725373E+00 -1.36128891E+00 +3.13161068E+00 
H  -1.80042151E+00 -2.15388345E+00 +2.15125101E+00 
H  -1.65687197E+00 -4.33700875E-01 +2.54269775E+00 
C  -2.50789680E+00 -4.74670730E-01 -2.71972389E+00 
H  -1.69401009E+00 +2.69480855E-01 -2.71748249E+00 
H  -2.06631420E+00 -1.45404033E+00 -2.96066227E+00 
H  -3.21133331E+00 -2.16405768E-01 -3.52243464E+00 
H  +1.15590787E+00 -3.41690276E+00 -1.27197549E+00 
H  -1.19192326E+00 -3.03751162E+00 -1.63268527E+00 
C  -6.58970016E+00 +4.78237874E-01 +8.11734615E-02 
H  -6.98637133E+00 +3.65124072E-01 +1.09963994E+00 
H  -6.65814494E+00 +1.54293423E+00 -1.92097602E-01 
H  -7.24678904E+00 -7.78617754E-02 -6.04848157E-01 
C  +6.10275532E+00 +6.73276124E-01 +8.82969594E-01 
H  +6.81940948E+00 -1.37380524E-01 +6.75511219E-01 
H  +6.42846453E+00 +1.54874245E+00 +2.98382031E-01 
H  +6.17158081E+00 +9.29194783E-01 +1.94908304E+00 
C  +1.61664735E+00 +2.89235287E+00 +1.13531444E+00 
C  +2.34909629E+00 +2.86471046E+00 -3.61804669E-02 
H  +2.10441400E+00 +2.60430635E+00 +2.07202063E+00 
H  +3.39159293E+00 +2.54266890E+00 -1.29966996E-02 
H  +2.01633685E+00 +3.40623065E+00 -9.23043583E-01 
59
Ru-14A_wB97XD
Ru +7.42659841E-02 +1.07317554E+00 +7.28693431E-01 
Cl +1.09283835E+00 +2.21679623E+00 -1.05230650E+00 
C  +1.27829330E-01 -6.39320946E-01 -2.95071242E-01 
N  -9.89871709E-01 -1.37465046E+00 -5.22072163E-01 
C  -6.89595549E-01 -2.69082440E+00 -1.08588176E+00 
C  +8.19012244E-01 -2.78756227E+00 -8.38655333E-01 
N  +1.19402851E+00 -1.38015599E+00 -6.55750310E-01 
H  +1.05590037E+00 -3.34982589E+00 +8.10629571E-02 
H  -1.26028396E+00 -3.47961775E+00 -5.77289221E-01 
C  +2.53212742E+00 -9.38279648E-01 -4.23633312E-01 
C  +2.78728650E+00 -1.66480745E-01 +7.25951943E-01 
C  +3.52789285E+00 -1.18728453E+00 -1.37414631E+00 
C  +4.08301190E+00 +3.10540932E-01 +9.16517935E-01 
C  +4.81781021E+00 -7.09316483E-01 -1.12005330E+00 
C  +5.11580869E+00 +3.74696449E-02 +1.69985449E-02 
H  +4.28690434E+00 +9.22951341E-01 +1.79899998E+00 
H  +5.60149505E+00 -8.98205964E-01 -1.85867645E+00 
C  -2.27966341E+00 -8.32781830E-01 -2.61808889E-01 
C  -3.20575417E+00 -6.43497758E-01 -1.29453567E+00 
C  -2.55679642E+00 -3.86409651E-01 +1.04534581E+00 
C  -4.43163703E+00 -4.35934087E-02 -9.85970078E-01 
C  -3.78409287E+00 +2.19765399E-01 +1.30340044E+00 
C  -4.74005255E+00 +3.96516097E-01 +2.99608903E-01 
H  -5.15509621E+00 +1.10085152E-01 -1.79078804E+00 
H  -3.99920092E+00 +5.68286137E-01 +2.31708599E+00 
C  +3.23937582E+00 -1.87962272E+00 -2.68178270E+00 
H  +3.98936892E+00 -1.59890020E+00 -3.43372959E+00 
H  +3.26780562E+00 -2.97864615E+00 -2.59189810E+00 
H  +2.25085609E+00 -1.59242453E+00 -3.07056925E+00 
C  +1.69043156E+00 +1.69971183E-01 +1.68941208E+00 
H  +1.32850615E+00 -7.68290026E-01 +2.15863557E+00 
H  +2.09857846E+00 +7.92615193E-01 +2.49970028E+00 
C  -1.55294492E+00 -5.57115338E-01 +2.15340303E+00 
H  -2.05009001E+00 -4.84506022E-01 +3.13153761E+00 
H  -1.02634789E+00 -1.51825498E+00 +2.09615443E+00 
H  -7.54813829E-01 +2.33996620E-01 +2.26531707E+00 
C  -2.88003642E+00 -1.00699171E+00 -2.71897877E+00 
H  -1.85979515E+00 -6.86897693E-01 -2.97900816E+00 
H  -2.95090673E+00 -2.09267737E+00 -2.89368106E+00 
H  -3.57691335E+00 -5.16704759E-01 -3.41148716E+00 
H  +1.34622867E+00 -3.25672948E+00 -1.67545752E+00 
H  -9.21901522E-01 -2.72788379E+00 -2.16153205E+00 
C  -6.05827329E+00 +1.05629802E+00 +6.10047434E-01 
H  -6.64102959E+00 +4.55302837E-01 +1.32565239E+00 
H  -5.90543561E+00 +2.04783130E+00 +1.06299974E+00 
H  -6.66672002E+00 +1.18697792E+00 -2.95266793E-01 
C  +6.50434766E+00 +5.67868568E-01 +2.65875208E-01 
H  +7.19277652E+00 +2.94405479E-01 -5.46128201E-01 
H  +6.49646545E+00 +1.66583659E+00 +3.48276791E-01 
H  +6.91735075E+00 +1.72204741E-01 +1.20727141E+00 
C  -8.94622607E-01 +2.77469088E+00 +1.77694118E+00 
C  +4.64807199E-01 +2.94972154E+00 +1.95276022E+00 
H  -1.47430928E+00 +2.36968157E+00 +2.61721199E+00 
H  +9.30125148E-01 +2.68754063E+00 +2.90583525E+00 
H  +1.04164781E+00 +3.59359592E+00 +1.28556817E+00 
C  -1.72262644E+00 +3.44490194E+00 +7.06233994E-01 
H  -1.08573625E+00 +3.89648059E+00 -6.60720630E-02 
H  -2.35460127E+00 +4.23019991E+00 +1.15417925E+00 
H  -2.40553459E+00 +2.72804458E+00 +2.15450935E-01 
59
Ru-14B_wB97XD
Ru -1.13199934E-01 +1.18097918E+00 +6.66973560E-01 
Cl +9.40845293E-01 +2.18112875E+00 -1.20774151E+00 
C  -1.33451133E-01 -4.82711834E-01 -4.37963025E-01 
N  -1.23498019E+00 -1.21236194E+00 -7.52248374E-01 
C  -8.98038262E-01 -2.59785810E+00 -1.08239600E+00 
C  +5.88109175E-01 -2.47666856E+00 -1.42108820E+00 
N  +9.50791386E-01 -1.19779946E+00 -7.99419112E-01 
H  +1.19501197E+00 -3.29246592E+00 -1.00664378E+00 
H  -1.08513128E+00 -3.24712799E+00 -2.09168003E-01 
C  +2.28443094E+00 -8.07892934E-01 -4.68315684E-01 
C  +2.48723475E+00 -1.92252620E-01 +7.83344779E-01 
C  +3.33469249E+00 -9.63891888E-01 -1.37832479E+00 
C  +3.77949000E+00 +2.04274531E-01 +1.12067252E+00 
C  +4.61794610E+00 -5.70163203E-01 -9.79712171E-01 
C  +4.86372879E+00 +7.97168040E-03 +2.62190520E-01 
H  +3.93908195E+00 +6.88387214E-01 +2.08793161E+00 
H  +5.44270977E+00 -6.89466066E-01 -1.68739203E+00 
C  -2.56522152E+00 -7.76442812E-01 -4.98072594E-01 
C  -3.47324666E+00 -6.87926354E-01 -1.56124408E+00 
C  -2.94076506E+00 -4.02399012E-01 +8.03895745E-01 
C  -4.77376521E+00 -2.51000502E-01 -1.28992417E+00 
C  -4.24235050E+00 +4.01221035E-02 +1.02642512E+00 
C  -5.17900188E+00 +1.16330869E-01 -8.50956770E-03 
H  -5.48437800E+00 -1.75743397E-01 -2.11718051E+00 
H  -4.53606752E+00 +3.32581930E-01 +2.03825618E+00 
C  +3.12320525E+00 -1.44506025E+00 -2.79160160E+00 
H  +4.00732047E+00 -1.22004020E+00 -3.40301263E+00 
H  +2.95224325E+00 -2.53160744E+00 -2.85426144E+00 
H  +2.26298063E+00 -9.33124318E-01 -3.24954078E+00 
C  +1.32457862E+00 +8.65848092E-02 +1.68021707E+00 
H  +8.74444904E-01 -8.76316221E-01 +1.99899551E+00 
H  +1.66951825E+00 +5.88935380E-01 +2.59804053E+00 
C  -1.95591743E+00 -4.59415028E-01 +1.93873849E+00 
H  -2.47850023E+00 -4.76542032E-01 +2.90600812E+00 
H  -1.29463719E+00 -1.33199629E+00 +1.88946816E+00 
H  -1.33169506E+00 +4.70566107E-01 +2.05656493E+00 
C  -3.06224544E+00 -1.01451114E+00 -2.97268556E+00 
H  -2.01979794E+00 -7.18387613E-01 -3.15770145E+00 
H  -3.15166127E+00 -2.09319985E+00 -3.18354149E+00 
H  -3.70285250E+00 -4.88772278E-01 -3.69343505E+00 
H  +7.40695191E-01 -2.44368458E+00 -2.50895151E+00 
H  -1.48984213E+00 -2.97512534E+00 -1.92541891E+00 
C  -6.58093516E+00 +5.95258536E-01 +2.65778219E-01 
H  -6.57423939E+00 +1.61074837E+00 +6.90899898E-01 
H  -7.18632528E+00 +6.16009635E-01 -6.50720935E-01 
H  -7.08694209E+00 -6.02149125E-02 +9.91648283E-01 
C  +6.24969997E+00 +4.36647750E-01 +6.69899291E-01 
H  +6.97132642E+00 +3.00373021E-01 -1.47902078E-01 
H  +6.26486731E+00 +1.49801466E+00 +9.62335531E-01 
H  +6.60620982E+00 -1.45499461E-01 +1.53473439E+00 
C  +4.90733063E-01 +3.21271449E+00 +1.57665179E+00 
C  -5.37312310E-01 +2.67378571E+00 +2.32101194E+00 
H  +2.27721029E-01 +3.88412639E+00 +7.53657088E-01 
H  -1.57217139E+00 +2.99117660E+00 +2.15562321E+00 
H  -3.25530110E-01 +2.21872185E+00 +3.29576305E+00 
C  +1.92664953E+00 +3.29697940E+00 +2.01005792E+00 
H  +2.13499931E+00 +2.65429392E+00 +2.87715756E+00 
H  +2.16225917E+00 +4.33546275E+00 +2.29694893E+00 
H  +2.59687728E+00 +3.01579393E+00 +1.18442706E+00 
59
Ru-14C_wB97XD
Ru -5.93235941E-02 +1.24823513E+00 +4.64040102E-01 
Cl +6.82278068E-01 +2.21364757E+00 -1.50577262E+00 
C  -3.29319407E-02 -5.69652790E-01 -3.95096674E-01 
N  -1.12313302E+00 -1.35422827E+00 -5.14545080E-01 
C  -8.11077216E-01 -2.67462950E+00 -1.05813657E+00 
C  +7.04848602E-01 -2.72620415E+00 -8.63511646E-01 
N  +1.04775139E+00 -1.30220352E+00 -7.46241163E-01 
H  +9.85201950E-01 -3.24664927E+00 +6.85196260E-02 
H  -1.34283520E+00 -3.46797303E+00 -5.15308254E-01 
C  +2.37547038E+00 -8.43293270E-01 -4.97037738E-01 
C  +2.59878662E+00 -3.72660793E-02 +6.36238493E-01 
C  +3.40124095E+00 -1.12546921E+00 -1.40502738E+00 
C  +3.89107118E+00 +4.36668601E-01 +8.58193657E-01 
C  +4.68535907E+00 -6.46574299E-01 -1.12233638E+00 
C  +4.95193346E+00 +1.29348721E-01 +2.86540740E-03 
H  +4.07016723E+00 +1.07201178E+00 +1.73001709E+00 
H  +5.49159139E+00 -8.61841262E-01 -1.82873390E+00 
C  -2.45062847E+00 -8.48272641E-01 -3.61509303E-01 
C  -3.05349745E+00 -1.50606630E-01 -1.41978090E+00 
C  -3.10237844E+00 -1.03911166E+00 +8.63046796E-01 
C  -4.33953106E+00 +3.51735209E-01 -1.22015992E+00 
C  -4.38978690E+00 -5.21081479E-01 +1.01625076E+00 
C  -5.02360309E+00 +1.75411696E-01 -1.40176011E-02 
H  -4.82028698E+00 +9.04512007E-01 -2.03173839E+00 
H  -4.90652086E+00 -6.57704125E-01 +1.96978868E+00 
C  +3.15048709E+00 -1.85880798E+00 -2.69777732E+00 
H  +3.91894236E+00 -1.59783814E+00 -3.43813100E+00 
H  +3.18135911E+00 -2.95407599E+00 -2.57173873E+00 
H  +2.17073840E+00 -1.58928545E+00 -3.11956805E+00 
C  +1.47026472E+00 +3.73307373E-01 +1.52991619E+00 
H  +1.00772808E+00 -5.25060432E-01 +2.00129701E+00 
H  +1.86041944E+00 +1.00033841E+00 +2.34327658E+00 
C  -2.40817153E+00 -1.74992531E+00 +1.99536564E+00 
H  -3.05669165E+00 -1.81022611E+00 +2.87945402E+00 
H  -2.11835481E+00 -2.77529456E+00 +1.71785032E+00 
H  -1.48292442E+00 -1.22627087E+00 +2.28521522E+00 
C  -2.31601272E+00 +8.52126679E-02 -2.71067514E+00 
H  -1.43649145E+00 +7.30776192E-01 -2.55078594E+00 
H  -1.95315731E+00 -8.56993138E-01 -3.14916489E+00 
H  -2.96799465E+00 +5.70733059E-01 -3.44883696E+00 
H  +1.21701039E+00 -3.21242998E+00 -1.70011542E+00 
H  -1.09538507E+00 -2.73191508E+00 -2.12287010E+00 
C  -6.41891110E+00 +7.18682763E-01 +1.56231264E-01 
H  -6.48501068E+00 +1.75933823E+00 -1.94591675E-01 
H  -7.14245637E+00 +1.29094582E-01 -4.29268437E-01 
H  -6.73727265E+00 +6.91537058E-01 +1.20758345E+00 
C  +6.33733047E+00 +6.49764408E-01 +2.87546815E-01 
H  +7.03925572E+00 +3.90045396E-01 -5.17302356E-01 
H  +6.33313876E+00 +1.74555682E+00 +3.93707178E-01 
H  +6.73178439E+00 +2.31629980E-01 +1.22733997E+00 
C  +2.87779720E-01 +3.29497398E+00 +1.47664291E+00 
C  -1.03741920E+00 +2.88933761E+00 +1.44991404E+00 
H  +6.54193096E-01 +3.90353240E+00 +6.44751510E-01 
H  -1.72177538E+00 +3.23594571E+00 +6.65115649E-01 
H  -1.52424345E+00 +2.51824954E+00 +2.36377241E+00 
C  +1.11379495E+00 +3.35463376E+00 +2.72995384E+00 
H  +7.41051983E-01 +2.66596923E+00 +3.50464465E+00 
H  +1.08650285E+00 +4.37515689E+00 +3.14824672E+00 
H  +2.17002486E+00 +3.11539746E+00 +2.53289356E+00 
59
Ru-14D_wB97XD
Ru +4.14443526E-01 +1.11716852E+00 +6.18067659E-01 
Cl -1.60830236E+00 +2.27694593E+00 +6.69633688E-01 
C  -3.32450001E-01 -4.65262855E-01 -3.75997589E-01 
N  -1.38799879E+00 -1.25640958E+00 -5.71012999E-01 
C  -1.00007228E+00 -2.50331047E+00 -1.25300546E+00 
C  +5.26950236E-01 -2.51917489E+00 -1.07453302E+00 
N  +7.72094719E-01 -1.09592616E+00 -8.25592706E-01 
H  +8.38256255E-01 -3.11962591E+00 -2.02090604E-01 
H  -1.49995085E+00 -3.36783199E+00 -7.96068820E-01 
C  +1.94677719E+00 -4.73991133E-01 -2.76075523E-01 
C  +2.08204185E+00 -3.47154652E-01 +1.14246929E+00 
C  +3.06583206E+00 -2.56620346E-01 -1.13926555E+00 
C  +3.37433976E+00 -9.53461710E-03 +1.65115055E+00 
C  +4.27909018E+00 +5.87255754E-02 -5.80075058E-01 
C  +4.45772784E+00 +1.64098495E-01 +8.27862260E-01 
H  +3.49237395E+00 +6.90606586E-02 +2.73459404E+00 
H  +5.13713463E+00 +2.34913563E-01 -1.23448019E+00 
C  -2.75926255E+00 -8.90649755E-01 -3.91982401E-01 
C  -3.39318972E+00 -1.18313545E-01 -1.37330050E+00 
C  -3.42933812E+00 -1.32111469E+00 +7.56522664E-01 
C  -4.74067274E+00 +1.89187982E-01 -1.19517359E+00 
C  -4.77909378E+00 -9.92083478E-01 +8.93169250E-01 
C  -5.45094759E+00 -2.41695723E-01 -7.20986108E-02 
H  -5.24787625E+00 +7.96002451E-01 -1.94988729E+00 
H  -5.31550394E+00 -1.32088469E+00 +1.78707632E+00 
C  +2.87702298E+00 -3.71760166E-01 -2.62601438E+00 
H  +3.77497528E+00 -3.95488100E-02 -3.16414286E+00 
H  +2.66716703E+00 -1.40943450E+00 -2.93154609E+00 
H  +2.02217533E+00 +2.39754123E-01 -2.95323071E+00 
C  +8.79948221E-01 -4.05316003E-01 +1.95881451E+00 
H  +2.36330752E-01 -1.28773886E+00 +1.84906868E+00 
H  +1.02641025E+00 -1.45677129E-01 +3.01365804E+00 
C  -2.69727062E+00 -2.05327433E+00 +1.84888012E+00 
H  -3.39845796E+00 -2.46594797E+00 +2.58659586E+00 
H  -2.08264272E+00 -2.88019144E+00 +1.46204501E+00 
H  -2.01946484E+00 -1.35960097E+00 +2.37131099E+00 
C  -2.61955573E+00 +4.29438974E-01 -2.54136553E+00 
H  -1.94244316E+00 +1.22404249E+00 -2.18824710E+00 
H  -2.00288968E+00 -3.37847713E-01 -3.03348355E+00 
H  -3.29364202E+00 +8.60540121E-01 -3.29353484E+00 
H  +1.05496606E+00 -2.88560497E+00 -1.96480861E+00 
H  -1.29088589E+00 -2.45785927E+00 -2.31618373E+00 
C  -6.89827020E+00 +1.37311470E-01 +1.07757835E-01 
H  -6.98381611E+00 +1.17859339E+00 +4.57902660E-01 
H  -7.45285354E+00 +6.25111018E-02 -8.39353047E-01 
H  -7.39516086E+00 -5.05278053E-01 +8.48175552E-01 
C  +5.81991000E+00 +5.01291029E-01 +1.37182351E+00 
H  +6.57910747E+00 -2.08647559E-01 +1.00841893E+00 
H  +6.13130465E+00 +1.50624097E+00 +1.04275027E+00 
H  +5.83244909E+00 +4.85378703E-01 +2.47021040E+00 
C  +1.52766350E+00 +3.08115461E+00 +8.98219654E-01 
C  +1.23077509E+00 +2.60679378E+00 +2.15588782E+00 
H  +7.70044383E-01 +3.70638687E+00 +4.09438031E-01 
H  +3.06745211E-01 +2.89114090E+00 +2.66178203E+00 
H  +2.02232164E+00 +2.17364930E+00 +2.77481123E+00 
C  +2.90706795E+00 +3.18111626E+00 +3.10703802E-01 
H  +3.63841086E+00 +2.60867630E+00 +8.94162744E-01 
H  +3.22352570E+00 +4.23800501E+00 +3.04189079E-01 
H  +2.93582869E+00 +2.82228362E+00 -7.29602099E-01 
9
propene_wB97XD
C  +9.88776782E-01 +4.50540229E-02 +1.12230979E-01 
C  +2.47836453E+00 +7.44026521E-02 +2.76807206E-01 
C  +3.21775498E+00 -9.26313200E-01 +7.53804800E-01 
H  +7.05814581E-01 +2.10134150E-01 -9.40347682E-01 
H  +5.12166926E-01 +8.48075746E-01 +6.98089226E-01 
H  +5.64830045E-01 -9.16821611E-01 +4.36647453E-01 
H  +2.97871966E+00 +1.00234825E+00 -2.54170417E-02 
H  +2.76334274E+00 -1.87120508E+00 +1.06806514E+00 
H  +4.30252975E+00 -8.39574934E-01 +8.48119918E-01 
50
Ru-15_wB97XD
Ru -1.07572198E+00 -1.46069931E+00 +8.82912852E-01 
Cl -4.76063586E-01 +4.23727216E-01 +2.04647986E+00 
N  -3.34857067E+00 -2.67372069E+00 +4.91755031E-01 
N  -3.58927610E+00 -1.99448045E+00 +2.56800042E+00 
C  -7.14626233E-01 -3.45910238E+00 +1.33627259E+00 
H  +3.18950248E-01 -3.74085729E+00 +1.57363910E+00 
H  -1.43046589E+00 -3.91559054E+00 +2.03110426E+00 
C  -1.03833968E+00 -3.42838572E+00 -7.77963651E-02 
C  -7.77114950E-02 -3.68012227E+00 -1.11493923E+00 
H  +8.87708168E-01 -4.10069880E+00 -8.22622781E-01 
C  -3.53856500E-01 -3.44320251E+00 -2.43584419E+00 
C  +6.52575539E-01 -3.72504125E+00 -3.51887694E+00 
H  +2.49090536E-01 -4.43863908E+00 -4.25459232E+00 
H  +1.58187120E+00 -4.14373050E+00 -3.10928879E+00 
H  +9.05050722E-01 -2.80267741E+00 -4.06545612E+00 
C  -1.63110407E+00 -2.91783502E+00 -2.79643721E+00 
H  -1.84282938E+00 -2.72993245E+00 -3.85237564E+00 
C  -2.59099858E+00 -2.63312758E+00 -1.86178011E+00 
C  -3.93335500E+00 -2.07143796E+00 -2.23494768E+00 
H  -3.98648100E+00 -1.85636097E+00 -3.31051461E+00 
H  -4.12877105E+00 -1.14234432E+00 -1.67783051E+00 
H  -4.74709018E+00 -2.77238051E+00 -1.98859004E+00 
C  -2.29450538E+00 -2.85469304E+00 -4.75629652E-01 
C  -2.80908204E+00 -1.91761400E+00 +1.48059897E+00 
C  -4.36638628E+00 -3.58378829E+00 +1.01516305E+00 
H  -3.93157845E+00 -4.56864804E+00 +1.25968846E+00 
H  -5.20146902E+00 -3.72575239E+00 +3.16206632E-01 
C  -4.78140418E+00 -2.80846475E+00 +2.28074279E+00 
H  -5.65163389E+00 -2.15653053E+00 +2.09126807E+00 
H  -5.01991539E+00 -3.46413591E+00 +3.12875648E+00 
C  -3.46584040E+00 -1.18782708E+00 +3.74063773E+00 
C  -2.94737428E+00 -1.76509933E+00 +4.90506753E+00 
C  -2.43518353E+00 -3.18070956E+00 +4.90055949E+00 
H  -2.17015051E+00 -3.50684767E+00 +5.91522356E+00 
H  -1.53429828E+00 -3.25195538E+00 +4.27113278E+00 
H  -3.17210376E+00 -3.89188958E+00 +4.49716501E+00 
C  -2.86394767E+00 -9.74646181E-01 +6.05188249E+00 
H  -2.46085209E+00 -1.41313317E+00 +6.96852198E+00 
C  -3.26501030E+00 +3.62446636E-01 +6.05031790E+00 
C  -3.12927892E+00 +1.21309373E+00 +7.28668352E+00 
H  -3.96599261E+00 +1.92069546E+00 +7.38065928E+00 
H  -2.20033347E+00 +1.80463231E+00 +7.24761077E+00 
H  -3.09453139E+00 +5.98913503E-01 +8.19763647E+00 
C  -3.75754736E+00 +9.09023097E-01 +4.86363576E+00 
H  -4.06070699E+00 +1.95907018E+00 +4.84242525E+00 
C  -3.86354334E+00 +1.54663371E-01 +3.69551036E+00 
C  -4.33092387E+00 +7.80667618E-01 +2.40953944E+00 
H  -4.80538165E+00 +1.75355140E+00 +2.59505566E+00 
H  -5.05060047E+00 +1.43883111E-01 +1.87346749E+00 
H  -3.46880948E+00 +9.40334283E-01 +1.74190118E+00 
50
Ru-15_triplet_wB97XD
Ru -8.62774541E-01 -1.10711934E+00 +1.65884365E+00 
Cl -5.67693855E-01 +1.21588650E+00 +1.66253228E+00 
N  -3.12462740E+00 -2.52713110E+00 +5.13434342E-01 
N  -3.57273697E+00 -1.86493715E+00 +2.55772678E+00 
C  -4.50319848E-01 -3.12405668E+00 +1.26434829E+00 
H  +6.17157912E-01 -3.38091180E+00 +1.36220772E+00 
H  -1.03097900E+00 -3.82391061E+00 +1.89471739E+00 
C  -8.89783055E-01 -3.21501744E+00 -1.67223413E-01 
C  +4.34100210E-03 -3.52297047E+00 -1.19628633E+00 
H  +1.04391560E+00 -3.73912862E+00 -9.35952219E-01 
C  -3.95478019E-01 -3.57735903E+00 -2.53370109E+00 
C  +5.97523142E-01 -3.93273590E+00 -3.61031980E+00 
H  +1.46602722E-01 -3.87464088E+00 -4.61071016E+00 
H  +9.81060148E-01 -4.95575851E+00 -3.47103950E+00 
H  +1.46343518E+00 -3.25337211E+00 -3.58778061E+00 
C  -1.72411938E+00 -3.28744153E+00 -2.84153944E+00 
H  -2.04761546E+00 -3.30031527E+00 -3.88565957E+00 
C  -2.65231823E+00 -2.93769466E+00 -1.85524134E+00 
C  -4.05483158E+00 -2.54569127E+00 -2.24066778E+00 
H  -4.09096379E+00 -2.21943397E+00 -3.28890209E+00 
H  -4.41951047E+00 -1.72006302E+00 -1.61156398E+00 
H  -4.76010826E+00 -3.38707015E+00 -2.13668185E+00 
C  -2.22653353E+00 -2.92151469E+00 -5.23196670E-01 
C  -2.65170657E+00 -1.81397605E+00 +1.57655033E+00 
C  -4.30194594E+00 -3.31289315E+00 +8.96277602E-01 
H  -3.99938191E+00 -4.35028865E+00 +1.12135134E+00 
H  -5.06023312E+00 -3.33473427E+00 +1.04710960E-01 
C  -4.78380215E+00 -2.57299715E+00 +2.14649863E+00 
H  -5.59083343E+00 -1.85524861E+00 +1.92042000E+00 
H  -5.13615342E+00 -3.24870553E+00 +2.93752356E+00 
C  -3.47877228E+00 -1.12451818E+00 +3.77714856E+00 
C  -3.01814438E+00 -1.78303403E+00 +4.92375872E+00 
C  -2.58553973E+00 -3.22456627E+00 +4.86009655E+00 
H  -2.29648264E+00 -3.59218441E+00 +5.85363801E+00 
H  -1.72217523E+00 -3.34446083E+00 +4.18653447E+00 
H  -3.38504789E+00 -3.87777761E+00 +4.47719605E+00 
C  -2.93922190E+00 -1.05803774E+00 +6.11435733E+00 
H  -2.57950895E+00 -1.55891498E+00 +7.01681309E+00 
C  -3.29837164E+00 +2.89245841E-01 +6.17411162E+00 
C  -3.18450517E+00 +1.07006241E+00 +7.45775307E+00 
H  -4.10804176E+00 +1.63132505E+00 +7.66497753E+00 
H  -2.36363578E+00 +1.80181402E+00 +7.39474591E+00 
H  -2.98398812E+00 +4.12429846E-01 +8.31488804E+00 
C  -3.74622208E+00 +9.13692938E-01 +5.00708076E+00 
H  -4.01976881E+00 +1.97157196E+00 +5.03720832E+00 
C  -3.84327714E+00 +2.29944594E-01 +3.79591046E+00 
C  -4.26820429E+00 +9.38311473E-01 +2.53850790E+00 
H  -4.72866504E+00 +1.90741207E+00 +2.77206190E+00 
H  -4.98887265E+00 +3.48801099E-01 +1.95279556E+00 
H  -3.38954031E+00 +1.12271386E+00 +1.89943912E+00 
59
Ru-16_wB97XD
Ru -7.55742594E-01 -1.35906843E+00 +1.32656606E+00 
Cl -9.28206819E-01 +5.67974625E-01 -6.21987293E-02 
N  -3.04147851E+00 -2.71378291E+00 +6.60240419E-01 
N  -3.37994085E+00 -2.06884860E+00 +2.72811404E+00 
C  -3.62023420E-01 -3.40542265E+00 +1.21476405E+00 
H  +6.96403236E-01 -3.69417953E+00 +1.27726530E+00 
H  -9.65597532E-01 -4.05803179E+00 +1.86465989E+00 
C  -8.39936318E-01 -3.33109721E+00 -1.86157771E-01 
C  +3.34804396E-02 -3.44942205E+00 -1.28603538E+00 
H  +1.07656197E+00 -3.71130266E+00 -1.09225794E+00 
C  -3.99232175E-01 -3.25589420E+00 -2.58878675E+00 
C  +5.41635492E-01 -3.38283475E+00 -3.75808723E+00 
H  +1.61142934E-01 -4.10428249E+00 -4.49751224E+00 
H  +1.53863933E+00 -3.71551821E+00 -3.43849355E+00 
H  +6.55939372E-01 -2.41503140E+00 -4.27075214E+00 
C  -1.74163766E+00 -2.90290689E+00 -2.80238837E+00 
H  -2.08406620E+00 -2.71596546E+00 -3.82380958E+00 
C  -2.63943084E+00 -2.73412901E+00 -1.75676827E+00 
C  -4.04541347E+00 -2.26153946E+00 -2.00489468E+00 
H  -4.14402981E+00 -1.84319991E+00 -3.01520135E+00 
H  -4.31961590E+00 -1.48147946E+00 -1.27893107E+00 
H  -4.77680469E+00 -3.08150384E+00 -1.91307704E+00 
C  -2.17834785E+00 -2.95959079E+00 -4.47298767E-01 
C  -2.50715246E+00 -1.99862003E+00 +1.69367055E+00 
C  -4.17909274E+00 -3.52383709E+00 +1.07743218E+00 
H  -3.86084483E+00 -4.55967209E+00 +1.28762979E+00 
H  -4.97194273E+00 -3.54664729E+00 +3.18764922E-01 
C  -4.60411328E+00 -2.78339722E+00 +2.34782780E+00 
H  -5.41670830E+00 -2.06216678E+00 +2.15316668E+00 
H  -4.92742551E+00 -3.45968648E+00 +3.15036997E+00 
C  -3.39814303E+00 -1.20183750E+00 +3.86269228E+00 
C  -3.16068174E+00 -1.74524718E+00 +5.13059078E+00 
C  -2.88808029E+00 -3.21578389E+00 +5.31186568E+00 
H  -2.28926578E+00 -3.39559604E+00 +6.21533661E+00 
H  -2.35322230E+00 -3.63614110E+00 +4.44878096E+00 
H  -3.82914435E+00 -3.77993479E+00 +5.42464982E+00 
C  -3.19083051E+00 -8.89262721E-01 +6.23446321E+00 
H  -2.99028122E+00 -1.30037336E+00 +7.22729695E+00 
C  -3.46391013E+00 +4.71084988E-01 +6.09853998E+00 
C  -3.46552195E+00 +1.39064147E+00 +7.29221188E+00 
H  -4.35977818E+00 +2.03181261E+00 +7.29899977E+00 
H  -2.58687291E+00 +2.05482085E+00 +7.27271790E+00 
H  -3.44031254E+00 +8.28273980E-01 +8.23588863E+00 
C  -3.72396475E+00 +9.73341950E-01 +4.81998289E+00 
H  -3.94842919E+00 +2.03638312E+00 +4.69817320E+00 
C  -3.70014963E+00 +1.59874629E-01 +3.68785660E+00 
C  -3.94990464E+00 +7.38728309E-01 +2.32122153E+00 
H  -4.40947722E+00 +1.73295772E+00 +2.39879329E+00 
H  -4.61573118E+00 +1.00999940E-01 +1.72051827E+00 
H  -3.01051418E+00 +8.36299783E-01 +1.75262836E+00 
C  -3.11343897E-01 -2.20697175E-01 +3.00242842E+00 
H  +5.24712571E-01 +4.54074270E-01 +2.77414817E+00 
H  -1.17326624E+00 +2.81133051E-01 +3.44705930E+00 
C  -3.20061957E-02 -1.58738423E+00 +3.29470213E+00 
H  -7.28313942E-01 -2.11122178E+00 +3.95599330E+00 
C  +1.39933490E+00 -2.06175461E+00 +3.42422396E+00 
H  +1.81900393E+00 -1.75071533E+00 +4.39655765E+00 
H  +1.48048667E+00 -3.15707731E+00 +3.36341231E+00 
H  +2.04458966E+00 -1.62971562E+00 +2.64034539E+00 
